# Supplementary material for: Genome-wide identification, expression profiles and phylogenetic analysis of Trihelix transcription factor family genes in sugar beet (Beta vulgaris L.) under abiotic stresses
Source: Research Square preprint supplement (doi:10.21203/rs.3.rs-7657378/v1), 2025-12-11
Supplement: Supplementary file 1 [file 04ff9e3274fd6dd8deda2dce.xlsx]

## Sheet: Primer
Table S7. Primers of sequences.
Group	Gene	Forward primer (5`- 3`)	Reverse primer (5`- 3`)
	Actin	ACTGGTATTGTGCTTGACTC	ATGAGATAATCAGTGAGATC
GT2	BvGT2	ATGGGCGAGTAGGGAAA	CTGTTGCTTGAGGCGAA
SIP1	BvGT3	ACCTTCAGAGCAACCG	TTCGCCTTCTCAACCT
GT3	BvGT4	GTTTGGAAGAGGCACT	CCAGAGGCATTAGGAT
SH4	BvGT5	GTGGGAATCCTTGGTT	GCTCTATCTGGTGCCT
GT1	BvGT10	ACACAGGTGATAGGTTCCC	CGAGTGACAAGATTTTTCC
SIP1	BvGT11	CCCGTTGTTCGTAAGTTTC	GCTACCGCTTCCCAATCAG
GT3	BvGT13	CCCTGTTCTCTCTTTTATCG	CTCCATTTTTCGCTTTACGG
GTY	BvGT23	GAGGTGCTGGTTTATTGC	CTACAAGCAGTTCCTTTACC
GT3	BvGT34	CAACTTCCAAGCGTCCAAT	TCCTTACACTCTTCAGCGG
		.	.
