# Supplementary material for: Genome-wide identification, expression profiles and phylogenetic analysis of Trihelix transcription factor family genes in sugar beet (Beta vulgaris L.) under abiotic stresses
Source: Research Square preprint supplement (doi:10.21203/rs.3.rs-7657378/v1), 2025-12-11
Supplement: Supplementary file 2 [file 6d64f15c27ef1b759d59a44c.xlsx]

## Sheet: Sheet1
Table S3. Cis-regulatory elements in the promoter region of BvGT genes.
Gene name	Cis-regulatory elements	Sequence	position	Base number	Strand Matrix	Organism	Function	Category
BvGT1	MYB	CAACCA	237	6	-	Arabidopsis thaliana		Other elements
BvGT1	MYB	TAACCA	475	6	-	Arabidopsis thaliana		Other elements
BvGT1	MYB	CAACCA	1181	6	-	Arabidopsis thaliana		Other elements
BvGT1	MYB	TAACCA	1317	6	-	Arabidopsis thaliana		Other elements
BvGT1	MYB	CAACAG	1637	6	-	Arabidopsis thaliana		Other elements
BvGT1	TCA-element	CCATCTTTTT	39	9	-	Nicotiana tabacum	cis-acting element involved in salicylic acid responsiveness	Other elements
BvGT1	Unnamed__4	CTCC	1	4	-	Petroselinum hortense		Other elements
BvGT1	Unnamed__4	CTCC	179	4	-	Petroselinum hortense		Other elements
BvGT1	Unnamed__4	CTCC	217	4	+	Petroselinum hortense		Other elements
BvGT1	Unnamed__4	CTCC	482	4	-	Petroselinum hortense		Other elements
BvGT1	Unnamed__4	CTCC	619	4	-	Petroselinum hortense		Other elements
BvGT1	Unnamed__4	CTCC	1116	4	-	Petroselinum hortense		Other elements
BvGT1	Unnamed__4	CTCC	1187	4	-	Petroselinum hortense		Other elements
BvGT1	Unnamed__4	CTCC	1650	4	-	Petroselinum hortense		Other elements
BvGT1	Unnamed__4	CTCC	1740	4	-	Petroselinum hortense		Other elements
BvGT1	chs-CMA1a	TTACTTAA	414	8	-	Daucus carota	part of a light responsive element	Light responsive elements
BvGT1	Unnamed__2	AACCTAACCT	1093	9	-	Petroselinum hortense		Other elements
BvGT1	MYB-like sequence	TAACCA	475	6	-	Arabidopsis thaliana		Other elements
BvGT1	MYB-like sequence	TAACCA	1317	6	-	Arabidopsis thaliana		Other elements
BvGT1	TATA-box	TATA	152	4	+	Arabidopsis thaliana	core promoter element around -30 of transcription start	Promoter related element
BvGT1	TATA-box	TATACA	268	6	-	Helianthus annuus	core promoter element around -30 of transcription start	Promoter related element
BvGT1	TATA-box	TATA	270	4	+	Arabidopsis thaliana	core promoter element around -30 of transcription start	Promoter related element
BvGT1	TATA-box	TATA	276	4	+	Arabidopsis thaliana	core promoter element around -30 of transcription start	Promoter related element
BvGT1	TATA-box	TATAAAA	301	7	-	Pisum sativum	core promoter element around -30 of transcription start	Promoter related element
BvGT1	TATA-box	TATAAA	302	6	-	Helianthus annuus	core promoter element around -30 of transcription start	Promoter related element
BvGT1	TATA-box	TATAA	303	5	-	Arabidopsis thaliana	core promoter element around -30 of transcription start	Promoter related element
BvGT1	TATA-box	TATA	304	4	+	Arabidopsis thaliana	core promoter element around -30 of transcription start	Promoter related element
BvGT1	TATA-box	ATATAT	340	6	+	Brassica napus	core promoter element around -30 of transcription start	Promoter related element
BvGT1	TATA-box	TATA	341	4	+	Arabidopsis thaliana	core promoter element around -30 of transcription start	Promoter related element
BvGT1	TATA-box	ATATAT	453	6	+	Brassica napus	core promoter element around -30 of transcription start	Promoter related element
BvGT1	TATA-box	TATATA	454	6	+	Arabidopsis thaliana	core promoter element around -30 of transcription start	Promoter related element
BvGT1	TATA-box	TATA	456	4	+	Arabidopsis thaliana	core promoter element around -30 of transcription start	Promoter related element
BvGT1	TATA-box	TATA	542	4	+	Arabidopsis thaliana	core promoter element around -30 of transcription start	Promoter related element
BvGT1	TATA-box	ccTATAAAaa	665	9	-	Arabidopsis thaliana	core promoter element around -30 of transcription start	Promoter related element
BvGT1	TATA-box	TATAAAA	666	7	-	Pisum sativum	core promoter element around -30 of transcription start	Promoter related element
BvGT1	TATA-box	TATAAA	667	6	-	Helianthus annuus	core promoter element around -30 of transcription start	Promoter related element
BvGT1	TATA-box	TATAA	668	5	-	Arabidopsis thaliana	core promoter element around -30 of transcription start	Promoter related element
BvGT1	TATA-box	TATA	669	4	+	Arabidopsis thaliana	core promoter element around -30 of transcription start	Promoter related element
BvGT1	TATA-box	TACAAAA	773	7	+	Oryza sativa	core promoter element around -30 of transcription start	Promoter related element
BvGT1	TATA-box	TACAAAA	956	7	+	Oryza sativa	core promoter element around -30 of transcription start	Promoter related element
BvGT1	TATA-box	ATATAT	1001	6	-	Brassica napus	core promoter element around -30 of transcription start	Promoter related element
BvGT1	TATA-box	TATA	1002	4	-	Arabidopsis thaliana	core promoter element around -30 of transcription start	Promoter related element
BvGT1	TATA-box	taTATAAAtc	1162	9	-	Arabidopsis thaliana	core promoter element around -30 of transcription start	Promoter related element
BvGT1	TATA-box	TATAAAT	1163	7	-	Brassica juncea	core promoter element around -30 of transcription start	Promoter related element
BvGT1	TATA-box	TATAAA	1164	6	-	Helianthus annuus	core promoter element around -30 of transcription start	Promoter related element
BvGT1	TATA-box	TATATAA	1165	7	-	Arabidopsis thaliana	core promoter element around -30 of transcription start	Promoter related element
BvGT1	TATA-box	TATATA	1166	6	-	Arabidopsis thaliana	core promoter element around -30 of transcription start	Promoter related element
BvGT1	TATA-box	ATATAT	1167	6	-	Brassica napus	core promoter element around -30 of transcription start	Promoter related element
BvGT1	TATA-box	TATA	1168	4	-	Arabidopsis thaliana	core promoter element around -30 of transcription start	Promoter related element
BvGT1	TATA-box	TATA	1284	4	-	Arabidopsis thaliana	core promoter element around -30 of transcription start	Promoter related element
BvGT1	TATA-box	ATTATA	1300	6	+	Brassica napus	core promoter element around -30 of transcription start	Promoter related element
BvGT1	TATA-box	TATAA	1301	5	-	Arabidopsis thaliana	core promoter element around -30 of transcription start	Promoter related element
BvGT1	TATA-box	TATA	1302	4	-	Arabidopsis thaliana	core promoter element around -30 of transcription start	Promoter related element
BvGT1	TATA-box	ATATAT	1629	6	-	Brassica napus	core promoter element around -30 of transcription start	Promoter related element
BvGT1	TATA-box	TATA	1630	4	-	Arabidopsis thaliana	core promoter element around -30 of transcription start	Promoter related element
BvGT1	TATA-box	TATACA	1757	6	-	Helianthus annuus	core promoter element around -30 of transcription start	Promoter related element
BvGT1	TATA-box	TATA	1759	4	-	Arabidopsis thaliana	core promoter element around -30 of transcription start	Promoter related element
BvGT1	TATA-box	ATATAT	1905	6	-	Brassica napus	core promoter element around -30 of transcription start	Promoter related element
BvGT1	TATA-box	TATA	1906	4	-	Arabidopsis thaliana	core promoter element around -30 of transcription start	Promoter related element
BvGT1	TATA-box	TATACA	1910	6	-	Helianthus annuus	core promoter element around -30 of transcription start	Promoter related element
BvGT1	TATA-box	TATATA	1912	6	-	Arabidopsis thaliana	core promoter element around -30 of transcription start	Promoter related element
BvGT1	TATA-box	ATATAT	1913	6	-	Brassica napus	core promoter element around -30 of transcription start	Promoter related element
BvGT1	TATA-box	TATATA	1914	6	-	Arabidopsis thaliana	core promoter element around -30 of transcription start	Promoter related element
BvGT1	TATA-box	ATATAT	1915	6	-	Brassica napus	core promoter element around -30 of transcription start	Promoter related element
BvGT1	TATA-box	TATATA	1916	6	-	Arabidopsis thaliana	core promoter element around -30 of transcription start	Promoter related element
BvGT1	TATA-box	ATATAA	1917	6	+	Brassica oleracea	core promoter element around -30 of transcription start	Promoter related element
BvGT1	TATA-box	TATA	1918	4	-	Arabidopsis thaliana	core promoter element around -30 of transcription start	Promoter related element
BvGT1	STRE	AGGGG	1079	5	+	Arabidopsis thaliana	Stress response element	Environmental stress-related element
BvGT1	ARE	AAACCA	930	6	-	Zea mays	cis-acting regulatory element essential for the anaerobic induction	Environmental stress-related element
BvGT1	ARE	AAACCA	1775	6	+	Zea mays	cis-acting regulatory element essential for the anaerobic induction	Environmental stress-related element
BvGT1	Myb-binding site	CAACAG	1637	6	-	Nicotiana tabacum		Site-binding related elements
BvGT1	ABRE	ACGTG	1437	5	+	Arabidopsis thaliana	cis-acting element involved in the abscisic acid responsiveness	Hormone responsive elements
BvGT1	TGACG-motif	TGACG	1394	5	+	Hordeum vulgare	cis-acting regulatory element involved in the MeJA-responsiveness	Hormone responsive elements
BvGT1	W box	TTGACC	1899	6	+	Arabidopsis thaliana		Environmental stress-related element
BvGT1	SARE	TTCGACCATCTT	42	11	-	Nicotiana tabacum	cis-acting element involved in salicylic acid responsiveness	Hormone responsive elements
BvGT1	CAAT-box	CAAT	77	4	-	Nicotiana glutinosa	common cis-acting element in promoter and enhancer regions	Site-binding related elements
BvGT1	CAAT-box	CAAT	134	4	-	Nicotiana glutinosa	common cis-acting element in promoter and enhancer regions	Site-binding related elements
BvGT1	CAAT-box	CCAAT	204	5	-	Arabidopsis thaliana	common cis-acting element in promoter and enhancer regions	Site-binding related elements
BvGT1	CAAT-box	CAAT	227	4	+	Nicotiana glutinosa	common cis-acting element in promoter and enhancer regions	Site-binding related elements
BvGT1	CAAT-box	CAAT	229	4	-	Nicotiana glutinosa	common cis-acting element in promoter and enhancer regions	Site-binding related elements
BvGT1	CAAT-box	CAAT	312	4	-	Nicotiana glutinosa	common cis-acting element in promoter and enhancer regions	Site-binding related elements
BvGT1	CAAT-box	CAAAT	369	5	-	Pisum sativum	common cis-acting element in promoter and enhancer regions	Site-binding related elements
BvGT1	CAAT-box	CAAT	375	4	-	Nicotiana glutinosa	common cis-acting element in promoter and enhancer regions	Site-binding related elements
BvGT1	CAAT-box	CAAT	383	4	+	Nicotiana glutinosa	common cis-acting element in promoter and enhancer regions	Site-binding related elements
BvGT1	CAAT-box	CAAT	385	4	-	Nicotiana glutinosa	common cis-acting element in promoter and enhancer regions	Site-binding related elements
BvGT1	CAAT-box	CAAT	432	4	-	Nicotiana glutinosa	common cis-acting element in promoter and enhancer regions	Site-binding related elements
BvGT1	CAAT-box	CAAT	447	4	-	Nicotiana glutinosa	common cis-acting element in promoter and enhancer regions	Site-binding related elements
BvGT1	CAAT-box	CAAAT	548	5	-	Pisum sativum	common cis-acting element in promoter and enhancer regions	Site-binding related elements
BvGT1	CAAT-box	CCAAT	606	5	+	Arabidopsis thaliana	common cis-acting element in promoter and enhancer regions	Site-binding related elements
BvGT1	CAAT-box	CAAT	607	4	+	Nicotiana glutinosa	common cis-acting element in promoter and enhancer regions	Site-binding related elements
BvGT1	CAAT-box	CAAT	704	4	-	Nicotiana glutinosa	common cis-acting element in promoter and enhancer regions	Site-binding related elements
BvGT1	CAAT-box	CAAT	792	4	+	Nicotiana glutinosa	common cis-acting element in promoter and enhancer regions	Site-binding related elements
BvGT1	CAAT-box	CAAT	836	4	+	Nicotiana glutinosa	common cis-acting element in promoter and enhancer regions	Site-binding related elements
BvGT1	CAAT-box	CAAT	977	4	-	Nicotiana glutinosa	common cis-acting element in promoter and enhancer regions	Site-binding related elements
BvGT1	CAAT-box	CAAAT	988	5	-	Pisum sativum	common cis-acting element in promoter and enhancer regions	Site-binding related elements
BvGT1	CAAT-box	CAAT	1036	4	-	Nicotiana glutinosa	common cis-acting element in promoter and enhancer regions	Site-binding related elements
BvGT1	CAAT-box	CAAAT	1129	5	+	Pisum sativum	common cis-acting element in promoter and enhancer regions	Site-binding related elements
BvGT1	CAAT-box	CAAT	1161	4	+	Nicotiana glutinosa	common cis-acting element in promoter and enhancer regions	Site-binding related elements
BvGT1	CAAT-box	CAAT	1298	4	+	Nicotiana glutinosa	common cis-acting element in promoter and enhancer regions	Site-binding related elements
BvGT1	CAAT-box	CAAAT	1421	5	-	Pisum sativum	common cis-acting element in promoter and enhancer regions	Site-binding related elements
BvGT1	CAAT-box	CAAAT	1429	5	-	Pisum sativum	common cis-acting element in promoter and enhancer regions	Site-binding related elements
BvGT1	CAAT-box	CAAT	1473	4	+	Nicotiana glutinosa	common cis-acting element in promoter and enhancer regions	Site-binding related elements
BvGT1	CAAT-box	CAAT	1504	4	-	Nicotiana glutinosa	common cis-acting element in promoter and enhancer regions	Site-binding related elements
BvGT1	CAAT-box	CAAT	1680	4	+	Nicotiana glutinosa	common cis-acting element in promoter and enhancer regions	Site-binding related elements
BvGT1	CAAT-box	CAAT	1696	4	-	Nicotiana glutinosa	common cis-acting element in promoter and enhancer regions	Site-binding related elements
BvGT1	CAAT-box	CAAAT	1748	5	+	Pisum sativum	common cis-acting element in promoter and enhancer regions	Site-binding related elements
BvGT1	CAAT-box	CAAT	1898	4	-	Nicotiana glutinosa	common cis-acting element in promoter and enhancer regions	Site-binding related elements
BvGT1	CAAT-box	CAAT	1936	4	+	Nicotiana glutinosa	common cis-acting element in promoter and enhancer regions	Site-binding related elements
BvGT1	CAAT-box	CAAT	1946	4	-	Nicotiana glutinosa	common cis-acting element in promoter and enhancer regions	Site-binding related elements
BvGT1	CAAT-box	CAAAT	1952	5	-	Pisum sativum	common cis-acting element in promoter and enhancer regions	Site-binding related elements
BvGT1	CAAT-box	CCAAT	1987	5	-	Arabidopsis thaliana	common cis-acting element in promoter and enhancer regions	Site-binding related elements
BvGT1	Unnamed__6	taTAAATATct	1918	10	+	Zea mays		Other elements
BvGT1	AT~TATA-box	TATATA	454	6	+	Arabidopsis thaliana	Site-binding related elements	Promoter related element
BvGT1	AT~TATA-box	TATATAAA	1164	8	-	Arabidopsis thaliana	Site-binding related elements	Promoter related element
BvGT1	AT~TATA-box	TATATA	1166	6	-	Arabidopsis thaliana	Site-binding related elements	Promoter related element
BvGT1	AT~TATA-box	TATATA	1912	6	-	Arabidopsis thaliana	Site-binding related elements	Promoter related element
BvGT1	AT~TATA-box	TATATA	1914	6	-	Arabidopsis thaliana	Site-binding related elements	Promoter related element
BvGT1	AT~TATA-box	TATATA	1916	6	-	Arabidopsis thaliana	Site-binding related elements	Promoter related element
BvGT1	Myb	TAACTG	1577	6	-	Arabidopsis thaliana		Other elements
BvGT1	LTR	CCGAAA	115	6	+	Hordeum vulgare	cis-acting element involved in low-temperature responsiveness	Environmental stress-related element
BvGT1	TCT-motif	TCTTAC	1121	6	+	Arabidopsis thaliana	part of a light responsive element	Light responsive elements
BvGT1	as-1	TGACG	1394	5	+	Arabidopsis thaliana		Site-binding related elements
BvGT1	O2-site	GATGACATGG	1666	9	+	Zea mays	cis-acting regulatory element involved in zein metabolism regulation	development related elements
BvGT1	GARE-motif	TCTGTTG	1636	7	+	Brassica oleracea	gibberellin-responsive element	Hormone responsive elements
BvGT1	CGTCA-motif	CGTCA	1394	5	-	Hordeum vulgare	cis-acting regulatory element involved in the MeJA-responsiveness	Hormone responsive elements
BvGT1		motif_sequence	174	4	-	organism	short_function	Other elements
BvGT1		motif_sequence	260	4	-	organism	short_function	Other elements
BvGT1		motif_sequence	428	4	-	organism	short_function	Other elements
BvGT1		motif_sequence	461	4	-	organism	short_function	Other elements
BvGT1		motif_sequence	482	4	-	organism	short_function	Other elements
BvGT1		motif_sequence	505	4	+	organism	short_function	Other elements
BvGT1		motif_sequence	653	4	-	organism	short_function	Other elements
BvGT1		motif_sequence	753	4	+	organism	short_function	Other elements
BvGT1		motif_sequence	853	4	+	organism	short_function	Other elements
BvGT1		motif_sequence	984	4	-	organism	short_function	Other elements
BvGT1		motif_sequence	1116	4	-	organism	short_function	Other elements
BvGT1		motif_sequence	1197	4	-	organism	short_function	Other elements
BvGT1		motif_sequence	1445	4	+	organism	short_function	Other elements
BvGT1		motif_sequence	1462	4	-	organism	short_function	Other elements
BvGT1		motif_sequence	1625	4	-	organism	short_function	Other elements
BvGT1		motif_sequence	1655	4	+	organism	short_function	Other elements
BvGT1		motif_sequence	1956	4	-	organism	short_function	Other elements
BvGT1		motif_sequence	1960	4	+	organism	short_function	Other elements
BvGT1		motif_sequence	1965	4	+	organism	short_function	Other elements
BvGT1	CAT-box	GCCACT	810	6	-	Arabidopsis thaliana	cis-acting regulatory element related to meristem expression	development related elements
BvGT1	circadian	CAAAGATATC	1411	9	+	Lycopersicon esculentum	cis-acting regulatory element involved in circadian control	development related elements
BvGT1	MRE	AACCTAA	1096	7	-	Petroselinum crispum	MYB binding site involved in light responsiveness	Light responsive elements
BvGT1	Unnamed__1	CGTGG	1438	5	+	Zea mays	60K protein binding site	Other elements
BvGT1	MYC	CAATTG	227	6	+	Arabidopsis thaliana		Other elements
BvGT1	MYC	CAATTG	383	6	+	Arabidopsis thaliana		Other elements
BvGT1	MYC	CATTTG	547	6	+	Arabidopsis thaliana		Other elements
BvGT1	MYC	CATTTG	1129	6	-	Arabidopsis thaliana		Other elements
BvGT1	MYC	CATGTG	1198	6	-	Arabidopsis thaliana		Other elements
BvGT1	MYC	CATTTG	1420	6	+	Arabidopsis thaliana		Other elements
BvGT1	MYC	CATTTG	1748	6	-	Arabidopsis thaliana		Other elements
BvGT1	MYC	CATGTG	1764	6	-	Arabidopsis thaliana		Other elements
BvGT1	MYC	CATTTG	1951	6	+	Arabidopsis thaliana		Other elements
BvGT1	GATA-motif	AAGGATAAGG	1086	9	+	Solanum tuberosum	part of a light responsive element	Light responsive elements
BvGT1	AAGAA-motif	GAAAGAA	508	7	-	Avena sativa	Relevant elements of Abscisic acid	Hormone responsive elements
BvGT1	G-Box	CACGTT	1436	6	-	Pisum sativum	cis-acting regulatory element involved in light responsiveness	Light responsive elements
BvGT1	WRE3	CCACCT	921	6	-	Pisum sativum		Other elements
BvGT1	Box 4	ATTAAT	997	6	+	Petroselinum crispum	part of a conserved DNA module involved in light responsiveness	Light responsive elements
BvGT1	Box 4	ATTAAT	1791	6	-	Petroselinum crispum	part of a conserved DNA module involved in light responsiveness	Light responsive elements
BvGT10	CCGTCC motif	CCGTCC	406	6	+	Nicotiana tabacum		development related elements
BvGT10	CCGTCC motif	CCGTCC	645	6	-	Nicotiana tabacum		development related elements
BvGT10	MYB	CAACAG	1508	6	-	Arabidopsis thaliana		Other elements
BvGT10	ERE	ATTTTAAA	449	8	-	Nicotiana glutinos	estrogen response element	Hormone responsive elements
BvGT10	ERE	ATTTTAAA	1327	8	-	Nicotiana glutinos	estrogen response element	Hormone responsive elements
BvGT10	Unnamed__10	TCCACGTAGA	1586	9	+	Zea mays		Other elements
BvGT10	Unnamed__8	TCCACGTAGA	1586	9	+	Zea mays		Other elements
BvGT10	Unnamed__4	CTCC	400	4	+	Petroselinum hortense		Other elements
BvGT10	Unnamed__4	CTCC	404	4	+	Petroselinum hortense		Other elements
BvGT10	Unnamed__4	CTCC	649	4	-	Petroselinum hortense		Other elements
BvGT10	Unnamed__4	CTCC	653	4	-	Petroselinum hortense		Other elements
BvGT10	Unnamed__4	CTCC	766	4	-	Petroselinum hortense		Other elements
BvGT10	Unnamed__4	CTCC	1532	4	-	Petroselinum hortense		Other elements
BvGT10	Unnamed__4	CTCC	1545	4	-	Petroselinum hortense		Other elements
BvGT10	Unnamed__4	CTCC	1548	4	-	Petroselinum hortense		Other elements
BvGT10	Unnamed__4	CTCC	1787	4	+	Petroselinum hortense		Other elements
BvGT10	Unnamed__4	CTCC	1882	4	+	Petroselinum hortense		Other elements
BvGT10	TATA-box	TATA	26	4	+	Arabidopsis thaliana	core promoter element around -30 of transcription start	Promoter related element
BvGT10	TATA-box	TATAA	117	5	-	Arabidopsis thaliana	core promoter element around -30 of transcription start	Promoter related element
BvGT10	TATA-box	TATA	118	4	+	Arabidopsis thaliana	core promoter element around -30 of transcription start	Promoter related element
BvGT10	TATA-box	TATA	138	4	+	Arabidopsis thaliana	core promoter element around -30 of transcription start	Promoter related element
BvGT10	TATA-box	ATATAT	152	6	+	Brassica napus	core promoter element around -30 of transcription start	Promoter related element
BvGT10	TATA-box	TATA	153	4	+	Arabidopsis thaliana	core promoter element around -30 of transcription start	Promoter related element
BvGT10	TATA-box	TATA	170	4	+	Arabidopsis thaliana	core promoter element around -30 of transcription start	Promoter related element
BvGT10	TATA-box	ATATAA	189	6	+	Brassica oleracea	core promoter element around -30 of transcription start	Promoter related element
BvGT10	TATA-box	TATA	190	4	+	Arabidopsis thaliana	core promoter element around -30 of transcription start	Promoter related element
BvGT10	TATA-box	TATA	232	4	+	Arabidopsis thaliana	core promoter element around -30 of transcription start	Promoter related element
BvGT10	TATA-box	TATA	252	4	+	Arabidopsis thaliana	core promoter element around -30 of transcription start	Promoter related element
BvGT10	TATA-box	TATA	273	4	+	Arabidopsis thaliana	core promoter element around -30 of transcription start	Promoter related element
BvGT10	TATA-box	TATA	297	4	+	Arabidopsis thaliana	core promoter element around -30 of transcription start	Promoter related element
BvGT10	TATA-box	ATTATA	353	6	+	Brassica napus	core promoter element around -30 of transcription start	Promoter related element
BvGT10	TATA-box	TATAA	354	5	-	Arabidopsis thaliana	core promoter element around -30 of transcription start	Promoter related element
BvGT10	TATA-box	TATA	355	4	+	Arabidopsis thaliana	core promoter element around -30 of transcription start	Promoter related element
BvGT10	TATA-box	TATA	373	4	+	Arabidopsis thaliana	core promoter element around -30 of transcription start	Promoter related element
BvGT10	TATA-box	ATATAA	389	6	+	Brassica oleracea	core promoter element around -30 of transcription start	Promoter related element
BvGT10	TATA-box	TATA	390	4	+	Arabidopsis thaliana	core promoter element around -30 of transcription start	Promoter related element
BvGT10	TATA-box	TATA	417	4	+	Arabidopsis thaliana	core promoter element around -30 of transcription start	Promoter related element
BvGT10	TATA-box	TATACA	478	6	-	Helianthus annuus	core promoter element around -30 of transcription start	Promoter related element
BvGT10	TATA-box	TATATA	480	6	+	Arabidopsis thaliana	core promoter element around -30 of transcription start	Promoter related element
BvGT10	TATA-box	ATATAT	481	6	+	Brassica napus	core promoter element around -30 of transcription start	Promoter related element
BvGT10	TATA-box	TATATA	482	6	+	Arabidopsis thaliana	core promoter element around -30 of transcription start	Promoter related element
BvGT10	TATA-box	ATATAA	483	6	+	Brassica oleracea	core promoter element around -30 of transcription start	Promoter related element
BvGT10	TATA-box	TATA	484	4	+	Arabidopsis thaliana	core promoter element around -30 of transcription start	Promoter related element
BvGT10	TATA-box	TATAAAA	552	7	-	Pisum sativum	core promoter element around -30 of transcription start	Promoter related element
BvGT10	TATA-box	TATAAA	553	6	-	Helianthus annuus	core promoter element around -30 of transcription start	Promoter related element
BvGT10	TATA-box	TATAA	554	5	-	Arabidopsis thaliana	core promoter element around -30 of transcription start	Promoter related element
BvGT10	TATA-box	TATA	555	4	+	Arabidopsis thaliana	core promoter element around -30 of transcription start	Promoter related element
BvGT10	TATA-box	TATA	636	4	+	Arabidopsis thaliana	core promoter element around -30 of transcription start	Promoter related element
BvGT10	TATA-box	TATAAAA	662	7	-	Pisum sativum	core promoter element around -30 of transcription start	Promoter related element
BvGT10	TATA-box	TATAAA	663	6	-	Helianthus annuus	core promoter element around -30 of transcription start	Promoter related element
BvGT10	TATA-box	TATAA	664	5	-	Arabidopsis thaliana	core promoter element around -30 of transcription start	Promoter related element
BvGT10	TATA-box	TATA	665	4	+	Arabidopsis thaliana	core promoter element around -30 of transcription start	Promoter related element
BvGT10	TATA-box	TATA	895	4	+	Arabidopsis thaliana	core promoter element around -30 of transcription start	Promoter related element
BvGT10	TATA-box	TATA	909	4	+	Arabidopsis thaliana	core promoter element around -30 of transcription start	Promoter related element
BvGT10	TATA-box	TATA	928	4	+	Arabidopsis thaliana	core promoter element around -30 of transcription start	Promoter related element
BvGT10	TATA-box	TATA	1004	4	-	Arabidopsis thaliana	core promoter element around -30 of transcription start	Promoter related element
BvGT10	TATA-box	ATTATA	1015	6	+	Brassica napus	core promoter element around -30 of transcription start	Promoter related element
BvGT10	TATA-box	TATAA	1016	5	-	Arabidopsis thaliana	core promoter element around -30 of transcription start	Promoter related element
BvGT10	TATA-box	TATA	1017	4	-	Arabidopsis thaliana	core promoter element around -30 of transcription start	Promoter related element
BvGT10	TATA-box	ATATAT	1029	6	-	Brassica napus	core promoter element around -30 of transcription start	Promoter related element
BvGT10	TATA-box	TATA	1030	4	-	Arabidopsis thaliana	core promoter element around -30 of transcription start	Promoter related element
BvGT10	TATA-box	ATATAA	1058	6	+	Brassica oleracea	core promoter element around -30 of transcription start	Promoter related element
BvGT10	TATA-box	TATA	1059	4	-	Arabidopsis thaliana	core promoter element around -30 of transcription start	Promoter related element
BvGT10	TATA-box	ATTATA	1094	6	+	Brassica napus	core promoter element around -30 of transcription start	Promoter related element
BvGT10	TATA-box	TATATAA	1095	7	-	Arabidopsis thaliana	core promoter element around -30 of transcription start	Promoter related element
BvGT10	TATA-box	TATATA	1096	6	-	Arabidopsis thaliana	core promoter element around -30 of transcription start	Promoter related element
BvGT10	TATA-box	ATATAA	1097	6	+	Brassica oleracea	core promoter element around -30 of transcription start	Promoter related element
BvGT10	TATA-box	TATA	1098	4	-	Arabidopsis thaliana	core promoter element around -30 of transcription start	Promoter related element
BvGT10	TATA-box	TATA	1362	4	-	Arabidopsis thaliana	core promoter element around -30 of transcription start	Promoter related element
BvGT10	TATA-box	TATA	1489	4	-	Arabidopsis thaliana	core promoter element around -30 of transcription start	Promoter related element
BvGT10	TATA-box	ccTATAAAaa	1560	10	+	Arabidopsis thaliana	core promoter element around -30 of transcription start	Promoter related element
BvGT10	TATA-box	TATA	1562	4	-	Arabidopsis thaliana	core promoter element around -30 of transcription start	Promoter related element
BvGT10	TATA-box	ATTATA	1798	6	+	Brassica napus	core promoter element around -30 of transcription start	Promoter related element
BvGT10	TATA-box	TATAA	1799	5	-	Arabidopsis thaliana	core promoter element around -30 of transcription start	Promoter related element
BvGT10	TATA-box	TATA	1800	4	-	Arabidopsis thaliana	core promoter element around -30 of transcription start	Promoter related element
BvGT10	TATA-box	ccTATAAAaa	1884	9	+	Arabidopsis thaliana	core promoter element around -30 of transcription start	Promoter related element
BvGT10	TATA-box	TATA	1886	4	-	Arabidopsis thaliana	core promoter element around -30 of transcription start	Promoter related element
BvGT10	TATA-box	ATATAT	1924	6	-	Brassica napus	core promoter element around -30 of transcription start	Promoter related element
BvGT10	TATA-box	TATA	1925	4	-	Arabidopsis thaliana	core promoter element around -30 of transcription start	Promoter related element
BvGT10	TATA-box	TATAAA	1955	6	-	Helianthus annuus	core promoter element around -30 of transcription start	Promoter related element
BvGT10	TATA-box	TATAA	1956	5	-	Arabidopsis thaliana	core promoter element around -30 of transcription start	Promoter related element
BvGT10	TATA-box	TATA	1957	4	-	Arabidopsis thaliana	core promoter element around -30 of transcription start	Promoter related element
BvGT10	TATA-box	TATATA	1962	6	-	Arabidopsis thaliana	core promoter element around -30 of transcription start	Promoter related element
BvGT10	TATA-box	TATA	1964	4	-	Arabidopsis thaliana	core promoter element around -30 of transcription start	Promoter related element
BvGT10	TATA-box	TATA	1971	4	-	Arabidopsis thaliana	core promoter element around -30 of transcription start	Promoter related element
BvGT10	TATA-box	TATATA	1978	6	-	Arabidopsis thaliana	core promoter element around -30 of transcription start	Promoter related element
BvGT10	TATA-box	ATATAT	1979	6	-	Brassica napus	core promoter element around -30 of transcription start	Promoter related element
BvGT10	TATA-box	TATA	1980	4	-	Arabidopsis thaliana	core promoter element around -30 of transcription start	Promoter related element
BvGT10	TATA-box	ATTATA	1983	6	+	Brassica napus	core promoter element around -30 of transcription start	Promoter related element
BvGT10	TATA-box	TATAA	1984	5	-	Arabidopsis thaliana	core promoter element around -30 of transcription start	Promoter related element
BvGT10	TATA-box	TATA	1985	4	-	Arabidopsis thaliana	core promoter element around -30 of transcription start	Promoter related element
BvGT10	STRE	AGGGG	1120	5	+	Arabidopsis thaliana	Stress response element	Environmental stress-related element
BvGT10	STRE	AGGGG	1282	5	-	Arabidopsis thaliana	Stress response element	Environmental stress-related element
BvGT10	STRE	AGGGG	1420	5	-	Arabidopsis thaliana	Stress response element	Environmental stress-related element
BvGT10	STRE	AGGGG	1700	5	+	Arabidopsis thaliana	Stress response element	Environmental stress-related element
BvGT10	STRE	AGGGG	1729	5	-	Arabidopsis thaliana	Stress response element	Environmental stress-related element
BvGT10	ARE	AAACCA	1167	6	+	Zea mays	cis-acting regulatory element essential for the anaerobic induction	Environmental stress-related element
BvGT10	ARE	AAACCA	1215	6	-	Zea mays	cis-acting regulatory element essential for the anaerobic induction	Environmental stress-related element
BvGT10	Myc	TCTCTTA	10	7	-	Arabidopsis thaliana		Other elements
BvGT10	Myc	TCTCTTA	162	7	-	Arabidopsis thaliana		Other elements
BvGT10	Myc	TCTCTTA	992	7	+	Arabidopsis thaliana		Other elements
BvGT10	W box	TTGACC	441	6	-	Arabidopsis thaliana		Environmental stress-related element
BvGT10	W box	TTGACC	459	6	+	Arabidopsis thaliana		Environmental stress-related element
BvGT10	W box	TTGACC	591	6	-	Arabidopsis thaliana		Environmental stress-related element
BvGT10	TGACG-motif	TGACG	607	5	+	Hordeum vulgare	cis-acting regulatory element involved in the MeJA-responsiveness	Hormone responsive elements
BvGT10	ABRE	ACGTG	94	5	-	Arabidopsis thaliana	cis-acting element involved in the abscisic acid responsiveness	Hormone responsive elements
BvGT10	Myb-binding site	CAACAG	1508	6	-	Nicotiana tabacum		Site-binding related elements
BvGT10	Unnamed__12	TCCACGTAGA	1586	9	+	Zea mays		Other elements
BvGT10	Unnamed__6	taTAAATATct	1017	10	+	Zea mays		Other elements
BvGT10	CAAT-box	CAAT	29	4	-	Nicotiana glutinosa	common cis-acting element in promoter and enhancer regions	Site-binding related elements
BvGT10	CAAT-box	CAAT	38	4	+	Nicotiana glutinosa	common cis-acting element in promoter and enhancer regions	Site-binding related elements
BvGT10	CAAT-box	CCCAATTT	99	8	-	Arabidopsis thaliana	common cis-acting element in promoter and enhancer regions	Site-binding related elements
BvGT10	CAAT-box	CCAAT	101	5	-	Arabidopsis thaliana	common cis-acting element in promoter and enhancer regions	Site-binding related elements
BvGT10	CAAT-box	CAAAT	181	5	+	Pisum sativum	common cis-acting element in promoter and enhancer regions	Site-binding related elements
BvGT10	CAAT-box	CAAT	187	4	+	Nicotiana glutinosa	common cis-acting element in promoter and enhancer regions	Site-binding related elements
BvGT10	CAAT-box	CAAT	218	4	+	Nicotiana glutinosa	common cis-acting element in promoter and enhancer regions	Site-binding related elements
BvGT10	CAAT-box	CAAAT	322	5	+	Pisum sativum	common cis-acting element in promoter and enhancer regions	Site-binding related elements
BvGT10	CAAT-box	CAAT	387	4	+	Nicotiana glutinosa	common cis-acting element in promoter and enhancer regions	Site-binding related elements
BvGT10	CAAT-box	CAAAT	475	5	-	Pisum sativum	common cis-acting element in promoter and enhancer regions	Site-binding related elements
BvGT10	CAAT-box	CAAT	526	4	+	Nicotiana glutinosa	common cis-acting element in promoter and enhancer regions	Site-binding related elements
BvGT10	CAAT-box	CAAT	541	4	+	Nicotiana glutinosa	common cis-acting element in promoter and enhancer regions	Site-binding related elements
BvGT10	CAAT-box	CAAT	576	4	-	Nicotiana glutinosa	common cis-acting element in promoter and enhancer regions	Site-binding related elements
BvGT10	CAAT-box	CCAAT	822	5	-	Arabidopsis thaliana	common cis-acting element in promoter and enhancer regions	Site-binding related elements
BvGT10	CAAT-box	CAAAT	948	5	-	Pisum sativum	common cis-acting element in promoter and enhancer regions	Site-binding related elements
BvGT10	CAAT-box	CAAAT	961	5	-	Pisum sativum	common cis-acting element in promoter and enhancer regions	Site-binding related elements
BvGT10	CAAT-box	CAAAT	1024	5	-	Pisum sativum	common cis-acting element in promoter and enhancer regions	Site-binding related elements
BvGT10	CAAT-box	CAAAT	1033	5	-	Pisum sativum	common cis-acting element in promoter and enhancer regions	Site-binding related elements
BvGT10	CAAT-box	CAAT	1048	4	-	Nicotiana glutinosa	common cis-acting element in promoter and enhancer regions	Site-binding related elements
BvGT10	CAAT-box	CAAT	1103	4	+	Nicotiana glutinosa	common cis-acting element in promoter and enhancer regions	Site-binding related elements
BvGT10	CAAT-box	CAAAT	1247	5	-	Pisum sativum	common cis-acting element in promoter and enhancer regions	Site-binding related elements
BvGT10	CAAT-box	CAAAT	1457	5	+	Pisum sativum	common cis-acting element in promoter and enhancer regions	Site-binding related elements
BvGT10	CAAT-box	CAAT	1621	4	-	Nicotiana glutinosa	common cis-acting element in promoter and enhancer regions	Site-binding related elements
BvGT10	CAAT-box	CAAT	1711	4	+	Nicotiana glutinosa	common cis-acting element in promoter and enhancer regions	Site-binding related elements
BvGT10	CAAT-box	CAAT	1796	4	+	Nicotiana glutinosa	common cis-acting element in promoter and enhancer regions	Site-binding related elements
BvGT10	CAAT-box	CAAT	1808	4	+	Nicotiana glutinosa	common cis-acting element in promoter and enhancer regions	Site-binding related elements
BvGT10	F-box	CTATTCTCATT	467	10	+	Lycopersicon esculentum	Elements related to flower development	development related elements
BvGT10	ABRE3a	TACGTG	94	6	-	Zea mays	Relevant elements of Abscisic acid	Hormone responsive elements
BvGT10	Myb	TAACTG	727	6	-	Arabidopsis thaliana		Other elements
BvGT10	AT~TATA-box	TATATA	480	6	+	Arabidopsis thaliana	Site-binding related elements	Promoter related element
BvGT10	AT~TATA-box	TATATA	482	6	+	Arabidopsis thaliana	Site-binding related elements	Promoter related element
BvGT10	AT~TATA-box	TATATA	1096	6	-	Arabidopsis thaliana	Site-binding related elements	Promoter related element
BvGT10	AT~TATA-box	TATATA	1962	6	-	Arabidopsis thaliana	Site-binding related elements	Promoter related element
BvGT10	AT~TATA-box	TATATA	1978	6	-	Arabidopsis thaliana	Site-binding related elements	Promoter related element
BvGT10	TCT-motif	TCTTAC	698	6	-	Arabidopsis thaliana	part of a light responsive element	Light responsive elements
BvGT10	TATA	TATAAAAT	661	8	-	Arabidopsis thaliana		Other elements
BvGT10	CGTCA-motif	CGTCA	607	5	-	Hordeum vulgare	cis-acting regulatory element involved in the MeJA-responsiveness	Hormone responsive elements
BvGT10	GARE-motif	TCTGTTG	1507	7	+	Brassica oleracea	gibberellin-responsive element	Hormone responsive elements
BvGT10	as-1	TGACG	607	5	+	Arabidopsis thaliana		Site-binding related elements
BvGT10	O2-site	GTTGACGTGA	1662	9	-	Zea mays	cis-acting regulatory element involved in zein metabolism regulation	development related elements
BvGT10	ABRE4	CACGTA	94	6	+	Zea mays	Relevant elements of Abscisic acid	Hormone responsive elements
BvGT10	G-box	TACGTG	94	6	-	Arabidopsis thaliana	cis-acting regulatory element involved in light responsiveness	Light responsive elements
BvGT10		motif_sequence	339	4	-	organism	short_function	Other elements
BvGT10		motif_sequence	579	4	-	organism	short_function	Other elements
BvGT10		motif_sequence	766	4	-	organism	short_function	Other elements
BvGT10		motif_sequence	1237	4	+	organism	short_function	Other elements
BvGT10		motif_sequence	1481	4	-	organism	short_function	Other elements
BvGT10		motif_sequence	1517	4	-	organism	short_function	Other elements
BvGT10		motif_sequence	1532	4	-	organism	short_function	Other elements
BvGT10		motif_sequence	1548	4	-	organism	short_function	Other elements
BvGT10		motif_sequence	1736	4	+	organism	short_function	Other elements
BvGT10	circadian	CAAAGATATC	1028	9	-	Lycopersicon esculentum	cis-acting regulatory element involved in circadian control	development related elements
BvGT10	Unnamed__14	TCCACGTAGA	1586	9	+	Zea mays		Other elements
BvGT10	ATCT-motif	AATCTAATCC	388	9	+	Pisum sativum	part of a conserved DNA module involved in light responsiveness	Light responsive elements
BvGT10	AE-box	AGAAACAA	624	8	+	Arabidopsis thaliana	part of a module for light response	Light responsive elements
BvGT10	A-box	CCGTCC	406	6	+	Petroselinum crispum	cis-acting regulatory element	Promoter related element
BvGT10	A-box	CCGTCC	645	6	-	Petroselinum crispum	cis-acting regulatory element	Promoter related element
BvGT10	MYC	CATTTG	474	6	+	Arabidopsis thaliana		Other elements
BvGT10	MYC	CATGTG	500	6	+	Arabidopsis thaliana		Other elements
BvGT10	MYC	CATTTG	947	6	+	Arabidopsis thaliana		Other elements
BvGT10	MYC	CATTTG	960	6	+	Arabidopsis thaliana		Other elements
BvGT10	HD-Zip 3	GTAAT(G/C)ATTAC	795	10	+	Arabidopsis thaliana	protein binding site	Site-binding related elements
BvGT10	CCGTCC-box	CCGTCC	406	6	+	Petroselinum hortense		development related elements
BvGT10	CCGTCC-box	CCGTCC	645	6	-	Petroselinum hortense		development related elements
BvGT10	AAGAA-motif	GAAAGAA	1513	7	+	Avena sativa	Relevant elements of Abscisic acid	Hormone responsive elements
BvGT10	AAGAA-motif	GAAAGAA	1756	7	-	Avena sativa	Relevant elements of Abscisic acid	Hormone responsive elements
BvGT10	AAGAA-motif	GAAAGAA	1760	7	-	Avena sativa	Relevant elements of Abscisic acid	Hormone responsive elements
BvGT10	AAGAA-motif	GAAAGAA	1856	7	-	Avena sativa	Relevant elements of Abscisic acid	Hormone responsive elements
BvGT10	AAGAA-motif	GAAAGAA	1860	7	-	Avena sativa	Relevant elements of Abscisic acid	Hormone responsive elements
BvGT10	AAGAA-motif	GAAAGAA	1864	7	-	Avena sativa	Relevant elements of Abscisic acid	Hormone responsive elements
BvGT10	AAGAA-motif	GAAAGAA	1868	7	-	Avena sativa	Relevant elements of Abscisic acid	Hormone responsive elements
BvGT10	AAGAA-motif	GAAAGAA	1872	7	-	Avena sativa	Relevant elements of Abscisic acid	Hormone responsive elements
BvGT10	AAGAA-motif	GAAAGAA	1876	7	-	Avena sativa	Relevant elements of Abscisic acid	Hormone responsive elements
BvGT10	AAGAA-motif	GAAAGAA	1906	7	-	Avena sativa	Relevant elements of Abscisic acid	Hormone responsive elements
BvGT10	AACA_motif	TAACAAACTCCA	1780	11	+	Oryza sativa	involved in endosperm-specific negative expression	development related elements
BvGT10	WRE3	CCACCT	1173	6	-	Pisum sativum		Other elements
BvGT10	Box 4	ATTAAT	565	6	+	Petroselinum crispum	part of a conserved DNA module involved in light responsiveness	Light responsive elements
BvGT10	Box 4	ATTAAT	875	6	+	Petroselinum crispum	part of a conserved DNA module involved in light responsiveness	Light responsive elements
BvGT10	Box 4	ATTAAT	1435	6	-	Petroselinum crispum	part of a conserved DNA module involved in light responsiveness	Light responsive elements
BvGT10	Box 4	ATTAAT	1656	6	-	Petroselinum crispum	part of a conserved DNA module involved in light responsiveness	Light responsive elements
BvGT10	Box 4	ATTAAT	1931	6	-	Petroselinum crispum	part of a conserved DNA module involved in light responsiveness	Light responsive elements
BvGT11	MYB-like sequence	TAACCA	207	6	-	Arabidopsis thaliana		Other elements
BvGT11	MYB-like sequence	TAACCA	727	6	-	Arabidopsis thaliana		Other elements
BvGT11	TC-rich repeats	ATTCTCTAAC	917	9	-	Nicotiana tabacum	cis-acting element involved in defense and stress responsiveness	Environmental stress-related element
BvGT11	Unnamed__4	CTCC	159	4	+	Petroselinum hortense		Other elements
BvGT11	Unnamed__4	CTCC	318	4	-	Petroselinum hortense		Other elements
BvGT11	Unnamed__4	CTCC	763	4	-	Petroselinum hortense		Other elements
BvGT11	Unnamed__4	CTCC	1178	4	+	Petroselinum hortense		Other elements
BvGT11	Unnamed__4	CTCC	1238	4	-	Petroselinum hortense		Other elements
BvGT11	Unnamed__4	CTCC	1413	4	+	Petroselinum hortense		Other elements
BvGT11	Unnamed__4	CTCC	1461	4	-	Petroselinum hortense		Other elements
BvGT11	Unnamed__4	CTCC	1556	4	-	Petroselinum hortense		Other elements
BvGT11	Unnamed__4	CTCC	1694	4	+	Petroselinum hortense		Other elements
BvGT11	Unnamed__4	CTCC	1697	4	+	Petroselinum hortense		Other elements
BvGT11	Unnamed__4	CTCC	1713	4	+	Petroselinum hortense		Other elements
BvGT11	Unnamed__4	CTCC	1812	4	+	Petroselinum hortense		Other elements
BvGT11	Unnamed__4	CTCC	1858	4	+	Petroselinum hortense		Other elements
BvGT11	Unnamed__4	CTCC	1861	4	+	Petroselinum hortense		Other elements
BvGT11	Unnamed__4	CTCC	1907	4	+	Petroselinum hortense		Other elements
BvGT11	Unnamed__4	CTCC	1918	4	+	Petroselinum hortense		Other elements
BvGT11	Unnamed__4	CTCC	1924	4	+	Petroselinum hortense		Other elements
BvGT11	Unnamed__4	CTCC	1930	4	+	Petroselinum hortense		Other elements
BvGT11	Unnamed__4	CTCC	1944	4	+	Petroselinum hortense		Other elements
BvGT11	Unnamed__4	CTCC	1961	4	+	Petroselinum hortense		Other elements
BvGT11	Unnamed__4	CTCC	1964	4	+	Petroselinum hortense		Other elements
BvGT11	Unnamed__4	CTCC	1967	4	+	Petroselinum hortense		Other elements
BvGT11	Unnamed__4	CTCC	1982	4	+	Petroselinum hortense		Other elements
BvGT11	TCA-element	CCATCTTTTT	1486	9	-	Nicotiana tabacum	cis-acting element involved in salicylic acid responsiveness	Hormone responsive elements
BvGT11	MYB	CAACAG	74	6	+	Arabidopsis thaliana		Other elements
BvGT11	MYB	TAACCA	207	6	-	Arabidopsis thaliana		Other elements
BvGT11	MYB	TAACCA	727	6	-	Arabidopsis thaliana		Other elements
BvGT11	MYB	CAACCA	1543	6	-	Arabidopsis thaliana		Other elements
BvGT11	MYB	CAACCA	1612	6	+	Arabidopsis thaliana		Other elements
BvGT11	MYB	CAACCA	1633	6	+	Arabidopsis thaliana		Other elements
BvGT11	MYB	CAACCA	1649	6	+	Arabidopsis thaliana		Other elements
BvGT11	ERE	ATTTTAAA	505	8	+	Nicotiana glutinos	estrogen response element	Hormone responsive elements
BvGT11	ERE	ATTTTAAA	1109	8	-	Nicotiana glutinos	estrogen response element	Hormone responsive elements
BvGT11	ARE	AAACCA	17	6	-	Zea mays	cis-acting regulatory element essential for the anaerobic induction	Environmental stress-related element
BvGT11	ARE	AAACCA	1477	6	+	Zea mays	cis-acting regulatory element essential for the anaerobic induction	Environmental stress-related element
BvGT11	STRE	AGGGG	262	5	+	Arabidopsis thaliana	Stress response element	Environmental stress-related element
BvGT11	STRE	AGGGG	760	5	+	Arabidopsis thaliana	Stress response element	Environmental stress-related element
BvGT11	STRE	AGGGG	774	5	+	Arabidopsis thaliana	Stress response element	Environmental stress-related element
BvGT11	STRE	AGGGG	1458	5	+	Arabidopsis thaliana	Stress response element	Environmental stress-related element
BvGT11	STRE	AGGGG	1467	5	+	Arabidopsis thaliana	Stress response element	Environmental stress-related element
BvGT11	TATA-box	TACAAAA	24	7	-	Oryza sativa	core promoter element around -30 of transcription start	Promoter related element
BvGT11	TATA-box	ATATAT	132	6	+	Brassica napus	core promoter element around -30 of transcription start	Promoter related element
BvGT11	TATA-box	TATA	133	4	+	Arabidopsis thaliana	core promoter element around -30 of transcription start	Promoter related element
BvGT11	TATA-box	TATACA	352	6	-	Helianthus annuus	core promoter element around -30 of transcription start	Promoter related element
BvGT11	TATA-box	TATA	354	4	+	Arabidopsis thaliana	core promoter element around -30 of transcription start	Promoter related element
BvGT11	TATA-box	TACATAAA	444	8	-	Oryza sativa	core promoter element around -30 of transcription start	Promoter related element
BvGT11	TATA-box	TATA	634	4	+	Arabidopsis thaliana	core promoter element around -30 of transcription start	Promoter related element
BvGT11	TATA-box	TATA	643	4	+	Arabidopsis thaliana	core promoter element around -30 of transcription start	Promoter related element
BvGT11	TATA-box	TATTTAAA	703	8	-	Arabidopsis thaliana	core promoter element around -30 of transcription start	Promoter related element
BvGT11	TATA-box	TATA	821	4	+	Arabidopsis thaliana	core promoter element around -30 of transcription start	Promoter related element
BvGT11	TATA-box	ATTATA	976	6	+	Brassica napus	core promoter element around -30 of transcription start	Promoter related element
BvGT11	TATA-box	TATAA	977	5	-	Arabidopsis thaliana	core promoter element around -30 of transcription start	Promoter related element
BvGT11	TATA-box	TATA	978	4	+	Arabidopsis thaliana	core promoter element around -30 of transcription start	Promoter related element
BvGT11	TATA-box	ATATAT	1392	6	-	Brassica napus	core promoter element around -30 of transcription start	Promoter related element
BvGT11	TATA-box	TATATA	1393	6	-	Arabidopsis thaliana	core promoter element around -30 of transcription start	Promoter related element
BvGT11	TATA-box	ATATAA	1394	6	+	Brassica oleracea	core promoter element around -30 of transcription start	Promoter related element
BvGT11	TATA-box	TATA	1395	4	-	Arabidopsis thaliana	core promoter element around -30 of transcription start	Promoter related element
BvGT11	TATA-box	ATTATA	1401	6	+	Brassica napus	core promoter element around -30 of transcription start	Promoter related element
BvGT11	TATA-box	TATAA	1402	5	-	Arabidopsis thaliana	core promoter element around -30 of transcription start	Promoter related element
BvGT11	TATA-box	TATA	1403	4	-	Arabidopsis thaliana	core promoter element around -30 of transcription start	Promoter related element
BvGT11	AC-I	(T/C)C(T/C)(C/T)ACC(T/C)ACC	1815	9	+	Phaseolus vulgaris	MYB binding site element	Site-binding related elements
BvGT11	GT1-motif	GGTTAA	728	6	+	Arabidopsis thaliana	light responsive element	Light responsive elements
BvGT11	GT1-motif	GGTTAA	1805	6	-	Arabidopsis thaliana	light responsive element	Light responsive elements
BvGT11	chs-CMA2a	TCACTTGA	740	8	-	Petroselinum crispum	part of a light responsive element	Light responsive elements
BvGT11	chs-CMA2a	TCACTTGA	1261	8	+	Petroselinum crispum	part of a light responsive element	Light responsive elements
BvGT11	TGA-element	AACGAC	382	6	-	Brassica oleracea	auxin-responsive element	Hormone responsive elements
BvGT11	TGA-element	AACGAC	417	6	-	Brassica oleracea	auxin-responsive element	Hormone responsive elements
BvGT11	CAAT-box	CAAAT	14	5	-	Pisum sativum	common cis-acting element in promoter and enhancer regions	Site-binding related elements
BvGT11	CAAT-box	CCAAT	43	5	+	Arabidopsis thaliana	common cis-acting element in promoter and enhancer regions	Site-binding related elements
BvGT11	CAAT-box	CAAT	44	4	+	Nicotiana glutinosa	common cis-acting element in promoter and enhancer regions	Site-binding related elements
BvGT11	CAAT-box	CAAT	63	4	-	Nicotiana glutinosa	common cis-acting element in promoter and enhancer regions	Site-binding related elements
BvGT11	CAAT-box	CAAAT	167	5	+	Pisum sativum	common cis-acting element in promoter and enhancer regions	Site-binding related elements
BvGT11	CAAT-box	CAAT	325	4	+	Nicotiana glutinosa	common cis-acting element in promoter and enhancer regions	Site-binding related elements
BvGT11	CAAT-box	CAAAT	349	5	-	Pisum sativum	common cis-acting element in promoter and enhancer regions	Site-binding related elements
BvGT11	CAAT-box	CAAAT	470	5	-	Pisum sativum	common cis-acting element in promoter and enhancer regions	Site-binding related elements
BvGT11	CAAT-box	CAAT	536	4	-	Nicotiana glutinosa	common cis-acting element in promoter and enhancer regions	Site-binding related elements
BvGT11	CAAT-box	CAAT	601	4	+	Nicotiana glutinosa	common cis-acting element in promoter and enhancer regions	Site-binding related elements
BvGT11	CAAT-box	CAAT	808	4	-	Nicotiana glutinosa	common cis-acting element in promoter and enhancer regions	Site-binding related elements
BvGT11	CAAT-box	CCAAT	880	5	+	Arabidopsis thaliana	common cis-acting element in promoter and enhancer regions	Site-binding related elements
BvGT11	CAAT-box	CAAT	881	4	+	Nicotiana glutinosa	common cis-acting element in promoter and enhancer regions	Site-binding related elements
BvGT11	CAAT-box	CAAT	930	4	-	Nicotiana glutinosa	common cis-acting element in promoter and enhancer regions	Site-binding related elements
BvGT11	CAAT-box	CCAAT	1045	5	-	Arabidopsis thaliana	common cis-acting element in promoter and enhancer regions	Site-binding related elements
BvGT11	CAAT-box	CCAAT	1194	5	+	Arabidopsis thaliana	common cis-acting element in promoter and enhancer regions	Site-binding related elements
BvGT11	CAAT-box	CAAT	1195	4	+	Nicotiana glutinosa	common cis-acting element in promoter and enhancer regions	Site-binding related elements
BvGT11	CAAT-box	CAAT	1247	4	-	Nicotiana glutinosa	common cis-acting element in promoter and enhancer regions	Site-binding related elements
BvGT11	CAAT-box	CAAT	1299	4	-	Nicotiana glutinosa	common cis-acting element in promoter and enhancer regions	Site-binding related elements
BvGT11	CAAT-box	CAAAT	1451	5	+	Pisum sativum	common cis-acting element in promoter and enhancer regions	Site-binding related elements
BvGT11	CAAT-box	CAAAT	1495	5	+	Pisum sativum	common cis-acting element in promoter and enhancer regions	Site-binding related elements
BvGT11	CAAT-box	CAAT	1550	4	-	Nicotiana glutinosa	common cis-acting element in promoter and enhancer regions	Site-binding related elements
BvGT11	CAAT-box	CAAT	1725	4	+	Nicotiana glutinosa	common cis-acting element in promoter and enhancer regions	Site-binding related elements
BvGT11	CAAT-box	CAAT	1871	4	+	Nicotiana glutinosa	common cis-acting element in promoter and enhancer regions	Site-binding related elements
BvGT11	CAAT-box	CAAT	1880	4	+	Nicotiana glutinosa	common cis-acting element in promoter and enhancer regions	Site-binding related elements
BvGT11	ABRE3a	TACGTG	1776	6	+	Zea mays	Relevant elements of Abscisic acid	Hormone responsive elements
BvGT11	TGACG-motif	TGACG	936	5	-	Hordeum vulgare	cis-acting regulatory element involved in the MeJA-responsiveness	Hormone responsive elements
BvGT11	TGACG-motif	TGACG	957	5	+	Hordeum vulgare	cis-acting regulatory element involved in the MeJA-responsiveness	Hormone responsive elements
BvGT11	ACE	CTAACGTATT	1320	9	-	Petroselinum crispum	cis-acting element involved in light responsiveness	Light responsive elements
BvGT11	ABRE	ACGTG	188	5	+	Arabidopsis thaliana	cis-acting element involved in the abscisic acid responsiveness	Hormone responsive elements
BvGT11	ABRE	CACGTG	895	6	+	Arabidopsis thaliana	cis-acting element involved in the abscisic acid responsiveness	Hormone responsive elements
BvGT11	ABRE	ACGTG	896	5	+	Arabidopsis thaliana	cis-acting element involved in the abscisic acid responsiveness	Hormone responsive elements
BvGT11	ABRE	ACGTG	1777	5	+	Arabidopsis thaliana	cis-acting element involved in the abscisic acid responsiveness	Hormone responsive elements
BvGT11	ABRE	ACGTG	1801	5	-	Arabidopsis thaliana	cis-acting element involved in the abscisic acid responsiveness	Hormone responsive elements
BvGT11	Myb-binding site	CAACAG	74	6	+	Nicotiana tabacum		Site-binding related elements
BvGT11	TCT-motif	TCTTAC	712	6	-	Arabidopsis thaliana	part of a light responsive element	Light responsive elements
BvGT11	I-box	AGATAAGG	1366	8	+	Triticum aestivum	part of a light responsive element	Light responsive elements
BvGT11	I-box	gGATAAGGTG	1912	9	-	Zea mays	part of a light responsive element	Light responsive elements
BvGT11	TATA	TATAAAAT	1395	8	+	Arabidopsis thaliana		Other elements
BvGT11	Myb	TAACTG	77	6	-	Arabidopsis thaliana		Other elements
BvGT11	AT~TATA-box	TATATA	1393	6	-	Arabidopsis thaliana	Site-binding related elements	Promoter related element
BvGT11	ABRE4	CACGTA	1776	6	-	Zea mays	Relevant elements of Abscisic acid	Hormone responsive elements
BvGT11	G-box	CACGTG	895	6	+	Arabidopsis thaliana	cis-acting regulatory element involved in light responsiveness	Light responsive elements
BvGT11	G-box	TAACACGTAG	1775	9	-	Brassica oleracea	cis-acting regulatory element involved in light responsiveness	Light responsive elements
BvGT11	G-box	TACGTG	1776	6	+	Arabidopsis thaliana	cis-acting regulatory element involved in light responsiveness	Light responsive elements
BvGT11		motif_sequence	49	4	-	organism	short_function	Other elements
BvGT11		motif_sequence	53	4	+	organism	short_function	Other elements
BvGT11		motif_sequence	162	4	+	organism	short_function	Other elements
BvGT11		motif_sequence	176	4	-	organism	short_function	Other elements
BvGT11		motif_sequence	318	4	-	organism	short_function	Other elements
BvGT11		motif_sequence	340	4	+	organism	short_function	Other elements
BvGT11		motif_sequence	539	4	-	organism	short_function	Other elements
BvGT11		motif_sequence	720	4	+	organism	short_function	Other elements
BvGT11		motif_sequence	852	4	+	organism	short_function	Other elements
BvGT11		motif_sequence	890	4	+	organism	short_function	Other elements
BvGT11		motif_sequence	1064	4	+	organism	short_function	Other elements
BvGT11		motif_sequence	1173	4	+	organism	short_function	Other elements
BvGT11		motif_sequence	1461	4	-	organism	short_function	Other elements
BvGT11		motif_sequence	1537	4	-	organism	short_function	Other elements
BvGT11		motif_sequence	1564	4	-	organism	short_function	Other elements
BvGT11		motif_sequence	1571	4	-	organism	short_function	Other elements
BvGT11		motif_sequence	1810	4	+	organism	short_function	Other elements
BvGT11		motif_sequence	1856	4	+	organism	short_function	Other elements
BvGT11		motif_sequence	1899	4	+	organism	short_function	Other elements
BvGT11		motif_sequence	1905	4	+	organism	short_function	Other elements
BvGT11		motif_sequence	1942	4	+	organism	short_function	Other elements
BvGT11		motif_sequence	1959	4	+	organism	short_function	Other elements
BvGT11		motif_sequence	1980	4	+	organism	short_function	Other elements
BvGT11	CGTCA-motif	CGTCA	936	5	+	Hordeum vulgare	cis-acting regulatory element involved in the MeJA-responsiveness	Hormone responsive elements
BvGT11	CGTCA-motif	CGTCA	957	5	-	Hordeum vulgare	cis-acting regulatory element involved in the MeJA-responsiveness	Hormone responsive elements
BvGT11	O2-site	GTTGACGTGA	1731	9	-	Zea mays	cis-acting regulatory element involved in zein metabolism regulation	development related elements
BvGT11	as-1	TGACG	936	5	-	Arabidopsis thaliana		Site-binding related elements
BvGT11	as-1	TGACG	957	5	+	Arabidopsis thaliana		Site-binding related elements
BvGT11	AE-box	AGAAACAA	1446	8	+	Arabidopsis thaliana	part of a module for light response	Light responsive elements
BvGT11	P-box	CCTTTTG	519	7	+	Oryza sativa	gibberellin-responsive element	Hormone responsive elements
BvGT11	P-box	CCTTTTG	756	7	-	Oryza sativa	gibberellin-responsive element	Hormone responsive elements
BvGT11	MYC	CATGTG	578	6	-	Arabidopsis thaliana		Other elements
BvGT11	TATC-box	TATCCCA	672	7	-	Oryza sativa	cis-acting element involved in gibberellin-responsiveness	Hormone responsive elements
BvGT11	L-box	ATCCCACCTAC	667	11	-	Petroselinum crispum	part of a light responsive element	Light responsive elements
BvGT11	TCCC-motif	TCTCCCT	316	7	-	Spinacia oleracea	part of a light responsive element	Light responsive elements
BvGT11	TCCC-motif	TCTCCCT	1177	7	+	Spinacia oleracea	part of a light responsive element	Light responsive elements
BvGT11	AAGAA-motif	gGTAAAGAAA	103	9	+	Avena sativa	Relevant elements of Abscisic acid	Hormone responsive elements
BvGT11	AAGAA-motif	gGTAAAGAAA	233	9	+	Avena sativa	Relevant elements of Abscisic acid	Hormone responsive elements
BvGT11	AAGAA-motif	GAAAGAA	1934	7	-	Avena sativa	Relevant elements of Abscisic acid	Hormone responsive elements
BvGT11	GATA-motif	AAGATAAGATT	1112	10	+	Arabidopsis thaliana	part of a light responsive element	Light responsive elements
BvGT11	GATA-motif	AAGGATAAGG	1914	9	-	Solanum tuberosum	part of a light responsive element	Light responsive elements
BvGT11	GATA-motif	AAGGATAAGG	1920	9	-	Solanum tuberosum	part of a light responsive element	Light responsive elements
BvGT11	GATA-motif	AAGGATAAGG	1926	9	-	Solanum tuberosum	part of a light responsive element	Light responsive elements
BvGT11	Box 4	ATTAAT	1021	6	-	Petroselinum crispum	part of a conserved DNA module involved in light responsiveness	Light responsive elements
BvGT11	Box 4	ATTAAT	1098	6	-	Petroselinum crispum	part of a conserved DNA module involved in light responsiveness	Light responsive elements
BvGT11	Box 4	ATTAAT	1680	6	-	Petroselinum crispum	part of a conserved DNA module involved in light responsiveness	Light responsive elements
BvGT11	WRE3	CCACCT	669	6	-	Pisum sativum		Other elements
BvGT11	WRE3	CCACCT	1895	6	+	Pisum sativum		Other elements
BvGT11	G-Box	CACGTT	187	6	-	Pisum sativum	cis-acting regulatory element involved in light responsiveness	Light responsive elements
BvGT11	G-Box	CACGTG	895	6	+	Pisum sativum	cis-acting regulatory element involved in light responsiveness	Light responsive elements
BvGT11	G-Box	CACGTT	1801	6	+	Pisum sativum	cis-acting regulatory element involved in light responsiveness	Light responsive elements
BvGT12	MYB	CAACAG	1123	6	+	Arabidopsis thaliana		Other elements
BvGT12	MYB	CAACCA	1395	6	-	Arabidopsis thaliana		Other elements
BvGT12	AAAC-motif	CAATCAAAACCT	1793	11	+	Spinacia oleracea	light responsive element	Light responsive elements
BvGT12	Unnamed__4	CTCC	45	4	-	Petroselinum hortense		Other elements
BvGT12	Unnamed__4	CTCC	66	4	-	Petroselinum hortense		Other elements
BvGT12	Unnamed__4	CTCC	92	4	-	Petroselinum hortense		Other elements
BvGT12	Unnamed__4	CTCC	139	4	-	Petroselinum hortense		Other elements
BvGT12	Unnamed__4	CTCC	1067	4	+	Petroselinum hortense		Other elements
BvGT12	Unnamed__4	CTCC	1073	4	+	Petroselinum hortense		Other elements
BvGT12	Unnamed__4	CTCC	1159	4	+	Petroselinum hortense		Other elements
BvGT12	Unnamed__4	CTCC	1383	4	-	Petroselinum hortense		Other elements
BvGT12	Unnamed__4	CTCC	1467	4	-	Petroselinum hortense		Other elements
BvGT12	Unnamed__4	CTCC	1621	4	-	Petroselinum hortense		Other elements
BvGT12	Unnamed__4	CTCC	1733	4	-	Petroselinum hortense		Other elements
BvGT12	TC-rich repeats	ATTCTCTAAC	180	9	+	Nicotiana tabacum	cis-acting element involved in defense and stress responsiveness	Environmental stress-related element
BvGT12	TC-rich repeats	GTTTTCTTAC	488	9	-	Nicotiana tabacum	cis-acting element involved in defense and stress responsiveness	Environmental stress-related element
BvGT12	TC-rich repeats	GTTTTCTTAC	1204	9	-	Nicotiana tabacum	cis-acting element involved in defense and stress responsiveness	Environmental stress-related element
BvGT12	TC-rich repeats	GTTTTCTTAC	1987	9	-	Nicotiana tabacum	cis-acting element involved in defense and stress responsiveness	Environmental stress-related element
BvGT12	Unnamed__2	AACCTAACCT	1022	10	+	Petroselinum hortense		Other elements
BvGT12	Unnamed__2	AACCTAACCT	1027	9	+	Petroselinum hortense		Other elements
BvGT12	Unnamed__2	AACCTAACCT	1513	9	-	Petroselinum hortense		Other elements
BvGT12	GT1-motif	GGTTAA	965	6	-	Arabidopsis thaliana	light responsive element	Light responsive elements
BvGT12	GT1-motif	GGTTAAT	1002	7	-	Avena sativa	light responsive element	Light responsive elements
BvGT12	GT1-motif	GGTTAA	1003	6	-	Arabidopsis thaliana	light responsive element	Light responsive elements
BvGT12	MBS	CAACTG	274	6	+	Arabidopsis thaliana	MYB binding site involved in drought-inducibility	Environmental stress-related element
BvGT12	TATA-box	TATAAA	172	6	-	Helianthus annuus	core promoter element around -30 of transcription start	Promoter related element
BvGT12	TATA-box	TATAA	173	5	-	Arabidopsis thaliana	core promoter element around -30 of transcription start	Promoter related element
BvGT12	TATA-box	TATA	174	4	+	Arabidopsis thaliana	core promoter element around -30 of transcription start	Promoter related element
BvGT12	TATA-box	ATTATA	299	6	+	Brassica napus	core promoter element around -30 of transcription start	Promoter related element
BvGT12	TATA-box	TATAA	300	5	-	Arabidopsis thaliana	core promoter element around -30 of transcription start	Promoter related element
BvGT12	TATA-box	TATA	301	4	+	Arabidopsis thaliana	core promoter element around -30 of transcription start	Promoter related element
BvGT12	TATA-box	TATTTAAA	324	8	-	Arabidopsis thaliana	core promoter element around -30 of transcription start	Promoter related element
BvGT12	TATA-box	TATAA	334	5	-	Arabidopsis thaliana	core promoter element around -30 of transcription start	Promoter related element
BvGT12	TATA-box	TATA	335	4	+	Arabidopsis thaliana	core promoter element around -30 of transcription start	Promoter related element
BvGT12	TATA-box	ATTATA	426	6	+	Brassica napus	core promoter element around -30 of transcription start	Promoter related element
BvGT12	TATA-box	TATAA	427	5	-	Arabidopsis thaliana	core promoter element around -30 of transcription start	Promoter related element
BvGT12	TATA-box	TATA	428	4	+	Arabidopsis thaliana	core promoter element around -30 of transcription start	Promoter related element
BvGT12	TATA-box	TATAAAA	561	7	-	Pisum sativum	core promoter element around -30 of transcription start	Promoter related element
BvGT12	TATA-box	TATAAA	562	6	-	Helianthus annuus	core promoter element around -30 of transcription start	Promoter related element
BvGT12	TATA-box	TATAA	563	5	-	Arabidopsis thaliana	core promoter element around -30 of transcription start	Promoter related element
BvGT12	TATA-box	TATA	564	4	+	Arabidopsis thaliana	core promoter element around -30 of transcription start	Promoter related element
BvGT12	TATA-box	TATA	611	4	+	Arabidopsis thaliana	core promoter element around -30 of transcription start	Promoter related element
BvGT12	TATA-box	TATACA	615	6	-	Helianthus annuus	core promoter element around -30 of transcription start	Promoter related element
BvGT12	TATA-box	TATA	617	4	+	Arabidopsis thaliana	core promoter element around -30 of transcription start	Promoter related element
BvGT12	TATA-box	ATATAA	691	6	+	Brassica oleracea	core promoter element around -30 of transcription start	Promoter related element
BvGT12	TATA-box	TATA	692	4	+	Arabidopsis thaliana	core promoter element around -30 of transcription start	Promoter related element
BvGT12	TATA-box	TATA	726	4	+	Arabidopsis thaliana	core promoter element around -30 of transcription start	Promoter related element
BvGT12	TATA-box	TATAA	739	5	-	Arabidopsis thaliana	core promoter element around -30 of transcription start	Promoter related element
BvGT12	TATA-box	TATA	740	4	+	Arabidopsis thaliana	core promoter element around -30 of transcription start	Promoter related element
BvGT12	TATA-box	TATA	882	4	+	Arabidopsis thaliana	core promoter element around -30 of transcription start	Promoter related element
BvGT12	TATA-box	TATA	911	4	+	Arabidopsis thaliana	core promoter element around -30 of transcription start	Promoter related element
BvGT12	TATA-box	TATA	1678	4	-	Arabidopsis thaliana	core promoter element around -30 of transcription start	Promoter related element
BvGT12	TATA-box	ATATAT	1706	6	-	Brassica napus	core promoter element around -30 of transcription start	Promoter related element
BvGT12	TATA-box	TATA	1707	4	-	Arabidopsis thaliana	core promoter element around -30 of transcription start	Promoter related element
BvGT12	TATA-box	TATA	1764	4	-	Arabidopsis thaliana	core promoter element around -30 of transcription start	Promoter related element
BvGT12	TATA-box	TATA	1850	4	-	Arabidopsis thaliana	core promoter element around -30 of transcription start	Promoter related element
BvGT12	ARE	AAACCA	544	6	-	Zea mays	cis-acting regulatory element essential for the anaerobic induction	Environmental stress-related element
BvGT12	STRE	AGGGG	1050	5	-	Arabidopsis thaliana	Stress response element	Environmental stress-related element
BvGT12	STRE	AGGGG	1070	5	-	Arabidopsis thaliana	Stress response element	Environmental stress-related element
BvGT12	STRE	AGGGG	1218	5	+	Arabidopsis thaliana	Stress response element	Environmental stress-related element
BvGT12	STRE	AGGGG	1231	5	+	Arabidopsis thaliana	Stress response element	Environmental stress-related element
BvGT12	STRE	AGGGG	1255	5	+	Arabidopsis thaliana	Stress response element	Environmental stress-related element
BvGT12	STRE	AGGGG	1287	5	+	Arabidopsis thaliana	Stress response element	Environmental stress-related element
BvGT12	STRE	AGGGG	1324	5	+	Arabidopsis thaliana	Stress response element	Environmental stress-related element
BvGT12	STRE	AGGGG	1342	5	+	Arabidopsis thaliana	Stress response element	Environmental stress-related element
BvGT12	STRE	AGGGG	1385	5	+	Arabidopsis thaliana	Stress response element	Environmental stress-related element
BvGT12	STRE	AGGGG	1414	5	+	Arabidopsis thaliana	Stress response element	Environmental stress-related element
BvGT12	STRE	AGGGG	1455	5	+	Arabidopsis thaliana	Stress response element	Environmental stress-related element
BvGT12	STRE	AGGGG	1471	5	+	Arabidopsis thaliana	Stress response element	Environmental stress-related element
BvGT12	STRE	AGGGG	1487	5	+	Arabidopsis thaliana	Stress response element	Environmental stress-related element
BvGT12	STRE	AGGGG	1495	5	+	Arabidopsis thaliana	Stress response element	Environmental stress-related element
BvGT12	STRE	AGGGG	1673	5	+	Arabidopsis thaliana	Stress response element	Environmental stress-related element
BvGT12	AC-I	(T/C)C(T/C)(C/T)ACC(T/C)ACC	1510	8.5	-	Phaseolus vulgaris	MYB binding site element	Site-binding related elements
BvGT12	ABRE	ACGTG	148	5	+	Arabidopsis thaliana	cis-acting element involved in the abscisic acid responsiveness	Hormone responsive elements
BvGT12	ABRE	ACGTG	485	5	-	Arabidopsis thaliana	cis-acting element involved in the abscisic acid responsiveness	Hormone responsive elements
BvGT12	ABRE	ACGTG	932	5	+	Arabidopsis thaliana	cis-acting element involved in the abscisic acid responsiveness	Hormone responsive elements
BvGT12	MBSI	aaaAaaC(G/C)GTTA	1749	10.5	-	Petunia hybrida	MYB binding site involved in flavonoid biosynthetic genes regulation	Site-binding related elements
BvGT12	ACE	CTAACGTATT	328	9	-	Petroselinum crispum	cis-acting element involved in light responsiveness	Light responsive elements
BvGT12	Myb-binding site	CAACAG	1123	6	+	Nicotiana tabacum		Site-binding related elements
BvGT12	TGACG-motif	TGACG	1307	5	+	Hordeum vulgare	cis-acting regulatory element involved in the MeJA-responsiveness	Hormone responsive elements
BvGT12	CAAT-box	CAAAT	6	5	+	Pisum sativum	common cis-acting element in promoter and enhancer regions	Site-binding related elements
BvGT12	CAAT-box	CCAAT	39	5	-	Arabidopsis thaliana	common cis-acting element in promoter and enhancer regions	Site-binding related elements
BvGT12	CAAT-box	CAAT	115	4	+	Nicotiana glutinosa	common cis-acting element in promoter and enhancer regions	Site-binding related elements
BvGT12	CAAT-box	CAAAT	266	5	-	Pisum sativum	common cis-acting element in promoter and enhancer regions	Site-binding related elements
BvGT12	CAAT-box	CCAAT	340	5	-	Arabidopsis thaliana	common cis-acting element in promoter and enhancer regions	Site-binding related elements
BvGT12	CAAT-box	CAAAT	345	5	+	Pisum sativum	common cis-acting element in promoter and enhancer regions	Site-binding related elements
BvGT12	CAAT-box	CAAAT	390	5	+	Pisum sativum	common cis-acting element in promoter and enhancer regions	Site-binding related elements
BvGT12	CAAT-box	CAAT	456	4	-	Nicotiana glutinosa	common cis-acting element in promoter and enhancer regions	Site-binding related elements
BvGT12	CAAT-box	CAAT	527	4	+	Nicotiana glutinosa	common cis-acting element in promoter and enhancer regions	Site-binding related elements
BvGT12	CAAT-box	CAAT	568	4	-	Nicotiana glutinosa	common cis-acting element in promoter and enhancer regions	Site-binding related elements
BvGT12	CAAT-box	CAAT	576	4	-	Nicotiana glutinosa	common cis-acting element in promoter and enhancer regions	Site-binding related elements
BvGT12	CAAT-box	CAAT	603	4	+	Nicotiana glutinosa	common cis-acting element in promoter and enhancer regions	Site-binding related elements
BvGT12	CAAT-box	CAAT	689	4	+	Nicotiana glutinosa	common cis-acting element in promoter and enhancer regions	Site-binding related elements
BvGT12	CAAT-box	CAAAT	850	5	+	Pisum sativum	common cis-acting element in promoter and enhancer regions	Site-binding related elements
BvGT12	CAAT-box	CAAAT	863	5	+	Pisum sativum	common cis-acting element in promoter and enhancer regions	Site-binding related elements
BvGT12	CAAT-box	CAAT	879	4	+	Nicotiana glutinosa	common cis-acting element in promoter and enhancer regions	Site-binding related elements
BvGT12	CAAT-box	CAAT	890	4	+	Nicotiana glutinosa	common cis-acting element in promoter and enhancer regions	Site-binding related elements
BvGT12	CAAT-box	CAAT	989	4	+	Nicotiana glutinosa	common cis-acting element in promoter and enhancer regions	Site-binding related elements
BvGT12	CAAT-box	CAAAT	1167	5	+	Pisum sativum	common cis-acting element in promoter and enhancer regions	Site-binding related elements
BvGT12	CAAT-box	CAAT	1170	4	-	Nicotiana glutinosa	common cis-acting element in promoter and enhancer regions	Site-binding related elements
BvGT12	CAAT-box	CAAAT	1648	5	-	Pisum sativum	common cis-acting element in promoter and enhancer regions	Site-binding related elements
BvGT12	CAAT-box	CAAT	1688	4	-	Nicotiana glutinosa	common cis-acting element in promoter and enhancer regions	Site-binding related elements
BvGT12	CAAT-box	CAAT	1699	4	-	Nicotiana glutinosa	common cis-acting element in promoter and enhancer regions	Site-binding related elements
BvGT12	CAAT-box	CAAT	1710	4	-	Nicotiana glutinosa	common cis-acting element in promoter and enhancer regions	Site-binding related elements
BvGT12	CAAT-box	CAAAT	1738	5	-	Pisum sativum	common cis-acting element in promoter and enhancer regions	Site-binding related elements
BvGT12	CAAT-box	CAAT	1776	4	-	Nicotiana glutinosa	common cis-acting element in promoter and enhancer regions	Site-binding related elements
BvGT12	CAAT-box	CAAT	1883	4	-	Nicotiana glutinosa	common cis-acting element in promoter and enhancer regions	Site-binding related elements
BvGT12	CAAT-box	CAAT	1896	4	+	Nicotiana glutinosa	common cis-acting element in promoter and enhancer regions	Site-binding related elements
BvGT12	CAAT-box	CAAT	1928	4	-	Nicotiana glutinosa	common cis-acting element in promoter and enhancer regions	Site-binding related elements
BvGT12	CAAT-box	CAAT	1952	4	-	Nicotiana glutinosa	common cis-acting element in promoter and enhancer regions	Site-binding related elements
BvGT12	ABRE3a	TACGTG	485	6	-	Zea mays	Relevant elements of Abscisic acid	Hormone responsive elements
BvGT12	AC-II	CCACCAACCCCC	1386	11	-	Phaseolus vulgaris	MYB binding site element	Site-binding related elements
BvGT12	TGA-element	AACGAC	961	6	-	Brassica oleracea	auxin-responsive element	Hormone responsive elements
BvGT12	Myb	CAACTG	274	6	+	Arabidopsis thaliana		Other elements
BvGT12	Myb	TAACTG	281	6	+	Arabidopsis thaliana		Other elements
BvGT12	Myb	TAACTG	956	6	+	Arabidopsis thaliana		Other elements
BvGT12	TCT-motif	TCTTAC	355	6	-	Arabidopsis thaliana	part of a light responsive element	Light responsive elements
BvGT12	TCT-motif	TCTTAC	1987	6	-	Arabidopsis thaliana	part of a light responsive element	Light responsive elements
BvGT12	as-1	TGACG	1307	5	+	Arabidopsis thaliana		Site-binding related elements
BvGT12	CGTCA-motif	CGTCA	1307	5	-	Hordeum vulgare	cis-acting regulatory element involved in the MeJA-responsiveness	Hormone responsive elements
BvGT12		motif_sequence	382	4	+	organism	short_function	Other elements
BvGT12		motif_sequence	384	4	-	organism	short_function	Other elements
BvGT12		motif_sequence	1147	4	-	organism	short_function	Other elements
BvGT12		motif_sequence	1157	4	+	organism	short_function	Other elements
BvGT12		motif_sequence	1467	4	-	organism	short_function	Other elements
BvGT12		motif_sequence	1491	4	-	organism	short_function	Other elements
BvGT12		motif_sequence	1860	4	+	organism	short_function	Other elements
BvGT12	CAT-box	GCCACT	1110	6	+	Arabidopsis thaliana	cis-acting regulatory element related to meristem expression	development related elements
BvGT12	G-box	TACGTG	485	6	-	Arabidopsis thaliana	cis-acting regulatory element involved in light responsiveness	Light responsive elements
BvGT12	ABRE4	CACGTA	485	6	+	Zea mays	Relevant elements of Abscisic acid	Hormone responsive elements
BvGT12	MRE	AACCTAA	1022	7	+	Petroselinum crispum	MYB binding site involved in light responsiveness	Light responsive elements
BvGT12	MRE	AACCTAA	1027	7	+	Petroselinum crispum	MYB binding site involved in light responsiveness	Light responsive elements
BvGT12	MRE	AACCTAA	1536	7	-	Petroselinum crispum	MYB binding site involved in light responsiveness	Light responsive elements
BvGT12	Unnamed__1	CGTGG	1099	5	-	Zea mays	60K protein binding site	Other elements
BvGT12	Unnamed__1	CGTGG	1143	5	-	Zea mays	60K protein binding site	Other elements
BvGT12	Unnamed__1	CGTGG	1371	5	+	Zea mays	60K protein binding site	Other elements
BvGT12	Unnamed__1	CGTGG	1827	5	-	Zea mays	60K protein binding site	Other elements
BvGT12	ACTCATCCT sequence	ACTCATCCT	251	9	-	Arabidopsis thaliana	Pro- or hypoosmolarity-responsive element (PRE)in drought stresses	Environmental stress-related element
BvGT12	P-box	CCTTTTG	947	7	+	Oryza sativa	gibberellin-responsive element	Hormone responsive elements
BvGT12	ATCT-motif	AATCTAATCC	1032	9	+	Pisum sativum	part of a conserved DNA module involved in light responsiveness	Light responsive elements
BvGT12	ATCT-motif	AATCTAATCC	1562	9	-	Pisum sativum	part of a conserved DNA module involved in light responsiveness	Light responsive elements
BvGT12	AE-box	AGAAACAA	94	8	+	Arabidopsis thaliana	part of a module for light response	Light responsive elements
BvGT12	3-AF3 binding site	CACTATCTAAC	1548	10	-	Pisum sativum	part of a conserved DNA module array (CMA3)	Promoter related element
BvGT12	GC-motif	CCCCCG	856	6	+	Zea mays	enhancer-like element involved in anoxic specific inducibility	Environmental stress-related element
BvGT12	GC-motif	CCCCCG	1310	6	-	Zea mays	enhancer-like element involved in anoxic specific inducibility	Environmental stress-related element
BvGT12	GATA-motif	GATAGGA	597	7	-	Arabidopsis thaliana	part of a light responsive element	Light responsive elements
BvGT12	GATA-motif	GATAGGG	1552	7	+	Pisum sativum	part of a light responsive element	Light responsive elements
BvGT12	AAGAA-motif	GAAAGAA	48	7	+	Avena sativa	Relevant elements of Abscisic acid	Hormone responsive elements
BvGT12	AAGAA-motif	gGTAAAGAAA	712	9	-	Avena sativa	Relevant elements of Abscisic acid	Hormone responsive elements
BvGT12	G-Box	CACGTT	147	6	-	Pisum sativum	cis-acting regulatory element involved in light responsiveness	Light responsive elements
BvGT12	G-Box	CACGTT	931	6	-	Pisum sativum	cis-acting regulatory element involved in light responsiveness	Light responsive elements
BvGT12	Box 4	ATTAAT	815	6	+	Petroselinum crispum	part of a conserved DNA module involved in light responsiveness	Light responsive elements
BvGT12	Box 4	ATTAAT	830	6	+	Petroselinum crispum	part of a conserved DNA module involved in light responsiveness	Light responsive elements
BvGT12	Box 4	ATTAAT	1588	6	-	Petroselinum crispum	part of a conserved DNA module involved in light responsiveness	Light responsive elements
BvGT12	Box 4	ATTAAT	1832	6	-	Petroselinum crispum	part of a conserved DNA module involved in light responsiveness	Light responsive elements
BvGT13	AuxRR-core	GGTCCAT	1723	7	+	Nicotiana tabacum	cis-acting regulatory element involved in auxin responsiveness	Hormone responsive elements
BvGT13	MYB	CAACAG	856	6	-	Arabidopsis thaliana		Other elements
BvGT13	MYB	TAACCA	1175	6	-	Arabidopsis thaliana		Other elements
BvGT13	MYB	TAACCA	1419	6	-	Arabidopsis thaliana		Other elements
BvGT13	TC-rich repeats	ATTCTCTAAC	396	9	-	Nicotiana tabacum	cis-acting element involved in defense and stress responsiveness	Environmental stress-related element
BvGT13	MYB-like sequence	TAACCA	1175	6	-	Arabidopsis thaliana		Other elements
BvGT13	MYB-like sequence	TAACCA	1419	6	-	Arabidopsis thaliana		Other elements
BvGT13	Unnamed__2	AACCTAACCT	444	9	+	Petroselinum hortense		Other elements
BvGT13	Unnamed__4	CTCC	57	4	+	Petroselinum hortense		Other elements
BvGT13	Unnamed__4	CTCC	198	4	+	Petroselinum hortense		Other elements
BvGT13	Unnamed__4	CTCC	215	4	+	Petroselinum hortense		Other elements
BvGT13	Unnamed__4	CTCC	467	4	+	Petroselinum hortense		Other elements
BvGT13	Unnamed__4	CTCC	499	4	+	Petroselinum hortense		Other elements
BvGT13	Unnamed__4	CTCC	521	4	-	Petroselinum hortense		Other elements
BvGT13	Unnamed__4	CTCC	600	4	-	Petroselinum hortense		Other elements
BvGT13	Unnamed__4	CTCC	1036	4	+	Petroselinum hortense		Other elements
BvGT13	Unnamed__4	CTCC	1063	4	+	Petroselinum hortense		Other elements
BvGT13	Unnamed__4	CTCC	1139	4	+	Petroselinum hortense		Other elements
BvGT13	Unnamed__4	CTCC	1295	4	+	Petroselinum hortense		Other elements
BvGT13	Unnamed__4	CTCC	1802	4	+	Petroselinum hortense		Other elements
BvGT13	Unnamed__4	CTCC	1819	4	+	Petroselinum hortense		Other elements
BvGT13	Unnamed__4	CTCC	1829	4	+	Petroselinum hortense		Other elements
BvGT13	Unnamed__4	CTCC	1836	4	+	Petroselinum hortense		Other elements
BvGT13	Unnamed__4	CTCC	1961	4	+	Petroselinum hortense		Other elements
BvGT13	HD-Zip 1	CAAT(A/T)ATTG	901	8	+	Arabidopsis thaliana	element involved in differentiation of the palisade mesophyll cells	development related elements
BvGT13	GT1-motif	GGTTAAT	1231	7	+	Avena sativa	light responsive element	Light responsive elements
BvGT13	GT1-motif	GGTTAA	1420	6	+	Arabidopsis thaliana	light responsive element	Light responsive elements
BvGT13	chs-CMA2a	TCACTTGA	815	8	+	Petroselinum crispum	part of a light responsive element	Light responsive elements
BvGT13	STRE	AGGGG	579	5	+	Arabidopsis thaliana	Stress response element	Environmental stress-related element
BvGT13	STRE	AGGGG	794	5	-	Arabidopsis thaliana	Stress response element	Environmental stress-related element
BvGT13	STRE	AGGGG	1795	5	-	Arabidopsis thaliana	Stress response element	Environmental stress-related element
BvGT13	TATA-box	TATA	8	4	+	Arabidopsis thaliana	core promoter element around -30 of transcription start	Promoter related element
BvGT13	TATA-box	TATAA	187	5	-	Arabidopsis thaliana	core promoter element around -30 of transcription start	Promoter related element
BvGT13	TATA-box	TATA	188	4	+	Arabidopsis thaliana	core promoter element around -30 of transcription start	Promoter related element
BvGT13	TATA-box	TATAA	279	5	-	Arabidopsis thaliana	core promoter element around -30 of transcription start	Promoter related element
BvGT13	TATA-box	TATA	280	4	+	Arabidopsis thaliana	core promoter element around -30 of transcription start	Promoter related element
BvGT13	TATA-box	ATATAT	330	6	+	Brassica napus	core promoter element around -30 of transcription start	Promoter related element
BvGT13	TATA-box	TATA	331	4	+	Arabidopsis thaliana	core promoter element around -30 of transcription start	Promoter related element
BvGT13	TATA-box	TATAAA	415	6	-	Helianthus annuus	core promoter element around -30 of transcription start	Promoter related element
BvGT13	TATA-box	TATAA	416	5	-	Arabidopsis thaliana	core promoter element around -30 of transcription start	Promoter related element
BvGT13	TATA-box	TATA	417	4	+	Arabidopsis thaliana	core promoter element around -30 of transcription start	Promoter related element
BvGT13	TATA-box	TATA	557	4	+	Arabidopsis thaliana	core promoter element around -30 of transcription start	Promoter related element
BvGT13	TATA-box	ATTATA	737	6	+	Brassica napus	core promoter element around -30 of transcription start	Promoter related element
BvGT13	TATA-box	TATAA	738	5	-	Arabidopsis thaliana	core promoter element around -30 of transcription start	Promoter related element
BvGT13	TATA-box	TATA	739	4	+	Arabidopsis thaliana	core promoter element around -30 of transcription start	Promoter related element
BvGT13	TATA-box	TATA	1003	4	-	Arabidopsis thaliana	core promoter element around -30 of transcription start	Promoter related element
BvGT13	TATA-box	TATA	1051	4	-	Arabidopsis thaliana	core promoter element around -30 of transcription start	Promoter related element
BvGT13	TATA-box	ATTATA	1363	6	+	Brassica napus	core promoter element around -30 of transcription start	Promoter related element
BvGT13	TATA-box	TATAA	1364	5	-	Arabidopsis thaliana	core promoter element around -30 of transcription start	Promoter related element
BvGT13	TATA-box	TATA	1365	4	-	Arabidopsis thaliana	core promoter element around -30 of transcription start	Promoter related element
BvGT13	TATA-box	TATA	1496	4	-	Arabidopsis thaliana	core promoter element around -30 of transcription start	Promoter related element
BvGT13	TATA-box	TATATA	1955	6	-	Arabidopsis thaliana	core promoter element around -30 of transcription start	Promoter related element
BvGT13	TATA-box	TATA	1957	4	-	Arabidopsis thaliana	core promoter element around -30 of transcription start	Promoter related element
BvGT13	ARE	AAACCA	514	6	-	Zea mays	cis-acting regulatory element essential for the anaerobic induction	Environmental stress-related element
BvGT13	Myc	TCTCTTA	1526	7	-	Arabidopsis thaliana		Other elements
BvGT13	Myc	TCTCTTA	1772	7	-	Arabidopsis thaliana		Other elements
BvGT13	TGACG-motif	TGACG	781	5	-	Hordeum vulgare	cis-acting regulatory element involved in the MeJA-responsiveness	Hormone responsive elements
BvGT13	ABRE	CACGTG	802	6	+	Arabidopsis thaliana	cis-acting element involved in the abscisic acid responsiveness	Hormone responsive elements
BvGT13	ABRE	ACGTG	803	5	+	Arabidopsis thaliana	cis-acting element involved in the abscisic acid responsiveness	Hormone responsive elements
BvGT13	ABRE	ACGTG	1114	5	-	Arabidopsis thaliana	cis-acting element involved in the abscisic acid responsiveness	Hormone responsive elements
BvGT13	Myb-binding site	CAACAG	856	6	-	Nicotiana tabacum		Site-binding related elements
BvGT13	CAAT-box	CAAT	191	4	-	Nicotiana glutinosa	common cis-acting element in promoter and enhancer regions	Site-binding related elements
BvGT13	CAAT-box	CAAAT	410	5	-	Pisum sativum	common cis-acting element in promoter and enhancer regions	Site-binding related elements
BvGT13	CAAT-box	CCAAT	541	5	+	Arabidopsis thaliana	common cis-acting element in promoter and enhancer regions	Site-binding related elements
BvGT13	CAAT-box	CAAT	542	4	+	Nicotiana glutinosa	common cis-acting element in promoter and enhancer regions	Site-binding related elements
BvGT13	CAAT-box	CAAT	544	4	-	Nicotiana glutinosa	common cis-acting element in promoter and enhancer regions	Site-binding related elements
BvGT13	CAAT-box	CAAT	563	4	+	Nicotiana glutinosa	common cis-acting element in promoter and enhancer regions	Site-binding related elements
BvGT13	CAAT-box	CAAT	589	4	-	Nicotiana glutinosa	common cis-acting element in promoter and enhancer regions	Site-binding related elements
BvGT13	CAAT-box	CAAAT	633	5	-	Pisum sativum	common cis-acting element in promoter and enhancer regions	Site-binding related elements
BvGT13	CAAT-box	CAAT	669	4	+	Nicotiana glutinosa	common cis-acting element in promoter and enhancer regions	Site-binding related elements
BvGT13	CAAT-box	CAAT	684	4	+	Nicotiana glutinosa	common cis-acting element in promoter and enhancer regions	Site-binding related elements
BvGT13	CAAT-box	CAAT	719	4	+	Nicotiana glutinosa	common cis-acting element in promoter and enhancer regions	Site-binding related elements
BvGT13	CAAT-box	CAAT	746	4	+	Nicotiana glutinosa	common cis-acting element in promoter and enhancer regions	Site-binding related elements
BvGT13	CAAT-box	CAAAT	895	5	+	Pisum sativum	common cis-acting element in promoter and enhancer regions	Site-binding related elements
BvGT13	CAAT-box	CAAT	901	4	+	Nicotiana glutinosa	common cis-acting element in promoter and enhancer regions	Site-binding related elements
BvGT13	CAAT-box	CAAT	906	4	-	Nicotiana glutinosa	common cis-acting element in promoter and enhancer regions	Site-binding related elements
BvGT13	CAAT-box	CAAT	916	4	-	Nicotiana glutinosa	common cis-acting element in promoter and enhancer regions	Site-binding related elements
BvGT13	CAAT-box	CCAAT	1144	5	+	Arabidopsis thaliana	common cis-acting element in promoter and enhancer regions	Site-binding related elements
BvGT13	CAAT-box	CAAT	1145	4	+	Nicotiana glutinosa	common cis-acting element in promoter and enhancer regions	Site-binding related elements
BvGT13	CAAT-box	CAAT	1171	4	+	Nicotiana glutinosa	common cis-acting element in promoter and enhancer regions	Site-binding related elements
BvGT13	CAAT-box	CCAAT	1173	5	-	Arabidopsis thaliana	common cis-acting element in promoter and enhancer regions	Site-binding related elements
BvGT13	CAAT-box	CAAAT	1236	5	-	Pisum sativum	common cis-acting element in promoter and enhancer regions	Site-binding related elements
BvGT13	CAAT-box	CAAAT	1380	5	-	Pisum sativum	common cis-acting element in promoter and enhancer regions	Site-binding related elements
BvGT13	CAAT-box	CAAT	1395	4	+	Nicotiana glutinosa	common cis-acting element in promoter and enhancer regions	Site-binding related elements
BvGT13	CAAT-box	CAAT	1453	4	+	Nicotiana glutinosa	common cis-acting element in promoter and enhancer regions	Site-binding related elements
BvGT13	CAAT-box	CAAT	1463	4	-	Nicotiana glutinosa	common cis-acting element in promoter and enhancer regions	Site-binding related elements
BvGT13	CAAT-box	CAAT	1577	4	-	Nicotiana glutinosa	common cis-acting element in promoter and enhancer regions	Site-binding related elements
BvGT13	CAAT-box	CAAAT	1620	5	+	Pisum sativum	common cis-acting element in promoter and enhancer regions	Site-binding related elements
BvGT13	CAAT-box	CAAT	1640	4	-	Nicotiana glutinosa	common cis-acting element in promoter and enhancer regions	Site-binding related elements
BvGT13	CAAT-box	CAAT	1645	4	-	Nicotiana glutinosa	common cis-acting element in promoter and enhancer regions	Site-binding related elements
BvGT13	CAAT-box	CAAT	1655	4	-	Nicotiana glutinosa	common cis-acting element in promoter and enhancer regions	Site-binding related elements
BvGT13	CAAT-box	CAAT	1672	4	-	Nicotiana glutinosa	common cis-acting element in promoter and enhancer regions	Site-binding related elements
BvGT13	CAAT-box	CAAT	1676	4	+	Nicotiana glutinosa	common cis-acting element in promoter and enhancer regions	Site-binding related elements
BvGT13	CAAT-box	CAAT	1698	4	-	Nicotiana glutinosa	common cis-acting element in promoter and enhancer regions	Site-binding related elements
BvGT13	CAAT-box	CAAT	1744	4	-	Nicotiana glutinosa	common cis-acting element in promoter and enhancer regions	Site-binding related elements
BvGT13	CAAT-box	CAAAT	1786	5	+	Pisum sativum	common cis-acting element in promoter and enhancer regions	Site-binding related elements
BvGT13	CAAT-box	CAAT	1868	4	+	Nicotiana glutinosa	common cis-acting element in promoter and enhancer regions	Site-binding related elements
BvGT13	Myb	TAACTG	510	6	+	Arabidopsis thaliana		Other elements
BvGT13	Myb	TAACTG	1202	6	+	Arabidopsis thaliana		Other elements
BvGT13	AT~TATA-box	TATATA	1955	6	-	Arabidopsis thaliana	Site-binding related elements	Promoter related element
BvGT13	TCT-motif	TCTTAC	726	6	+	Arabidopsis thaliana	part of a light responsive element	Light responsive elements
BvGT13	CGTCA-motif	CGTCA	781	5	+	Hordeum vulgare	cis-acting regulatory element involved in the MeJA-responsiveness	Hormone responsive elements
BvGT13	GARE-motif	TCTGTTG	855	7	+	Brassica oleracea	gibberellin-responsive element	Hormone responsive elements
BvGT13	as-1	TGACG	781	5	-	Arabidopsis thaliana		Site-binding related elements
BvGT13	G-box	CACGTG	802	6	+	Arabidopsis thaliana	cis-acting regulatory element involved in light responsiveness	Light responsive elements
BvGT13	G-box	TAAACGTG	1114	8	-	Brassica oleracea	cis-acting regulatory element involved in light responsiveness	Light responsive elements
BvGT13		motif_sequence	234	4	+	organism	short_function	Other elements
BvGT13		motif_sequence	248	4	+	organism	short_function	Other elements
BvGT13		motif_sequence	373	4	-	organism	short_function	Other elements
BvGT13		motif_sequence	655	4	-	organism	short_function	Other elements
BvGT13		motif_sequence	671	4	+	organism	short_function	Other elements
BvGT13		motif_sequence	676	4	+	organism	short_function	Other elements
BvGT13		motif_sequence	748	4	+	organism	short_function	Other elements
BvGT13		motif_sequence	1089	4	+	organism	short_function	Other elements
BvGT13		motif_sequence	1246	4	-	organism	short_function	Other elements
BvGT13		motif_sequence	1817	4	+	organism	short_function	Other elements
BvGT13		motif_sequence	1901	4	+	organism	short_function	Other elements
BvGT13		motif_sequence	1935	4	+	organism	short_function	Other elements
BvGT13	Unnamed__1	CGTGG	1113	5	-	Zea mays	60K protein binding site	Other elements
BvGT13	ATCT-motif	AATCTAATCC	1482	9	+	Pisum sativum	part of a conserved DNA module involved in light responsiveness	Light responsive elements
BvGT13	AE-box	AGAAACTT	131	8	+	Arabidopsis thaliana	part of a module for light response	Light responsive elements
BvGT13	MYC	CATGTG	387	6	-	Arabidopsis thaliana		Other elements
BvGT13	MYC	CATTTG	409	6	+	Arabidopsis thaliana		Other elements
BvGT13	MYC	CAATTG	542	6	+	Arabidopsis thaliana		Other elements
BvGT13	MYC	CAATTG	1171	6	-	Arabidopsis thaliana		Other elements
BvGT13	AAGAA-motif	GAAAGAA	1904	7	-	Avena sativa	Relevant elements of Abscisic acid	Hormone responsive elements
BvGT13	GCN4_motif	TGAGTCA	438	7	-	Oryza sativa	cis-regulatory element involved in endosperm expression	development related elements
BvGT13	G-Box	CACGTG	802	6	+	Pisum sativum	cis-acting regulatory element involved in light responsiveness	Light responsive elements
BvGT13	G-Box	CACGTT	1114	6	+	Pisum sativum	cis-acting regulatory element involved in light responsiveness	Light responsive elements
BvGT13	Box 4	ATTAAT	360	6	+	Petroselinum crispum	part of a conserved DNA module involved in light responsiveness	Light responsive elements
BvGT13	Box 4	ATTAAT	1329	6	-	Petroselinum crispum	part of a conserved DNA module involved in light responsiveness	Light responsive elements
BvGT13	Box 4	ATTAAT	1351	6	-	Petroselinum crispum	part of a conserved DNA module involved in light responsiveness	Light responsive elements
BvGT14	Box 4	ATTAAT	1016	6	-	Petroselinum crispum	part of a conserved DNA module involved in light responsiveness	Light responsive elements
BvGT14	AAGAA-motif	gGTAAAGAAA	261	9	+	Avena sativa	Relevant elements of Abscisic acid	Hormone responsive elements
BvGT14	AAGAA-motif	gGTAAAGAAA	897	9	-	Avena sativa	Relevant elements of Abscisic acid	Hormone responsive elements
BvGT14	AAGAA-motif	GAAAGAA	1863	7	-	Avena sativa	Relevant elements of Abscisic acid	Hormone responsive elements
BvGT14	AAGAA-motif	GAAAGAA	1867	7	-	Avena sativa	Relevant elements of Abscisic acid	Hormone responsive elements
BvGT14	GATA-motif	AAGATAAGATT	862	10	-	Arabidopsis thaliana	part of a light responsive element	Light responsive elements
BvGT14	MYC	CATTTG	516	6	+	Arabidopsis thaliana		Other elements
BvGT14	MYC	CATGTG	544	6	-	Arabidopsis thaliana		Other elements
BvGT14	MYC	CATTTG	625	6	+	Arabidopsis thaliana		Other elements
BvGT14	MYC	CATTTG	652	6	+	Arabidopsis thaliana		Other elements
BvGT14	MYC	CAATTG	1042	6	-	Arabidopsis thaliana		Other elements
BvGT14	MYC	CATGTG	1099	6	+	Arabidopsis thaliana		Other elements
BvGT14	MYC	CATTTG	1521	6	-	Arabidopsis thaliana		Other elements
BvGT14	ATCT-motif	AATCTAATCC	1688	9	+	Pisum sativum	part of a conserved DNA module involved in light responsiveness	Light responsive elements
BvGT14	MRE	AACCTAA	953	7	-	Petroselinum crispum	MYB binding site involved in light responsiveness	Light responsive elements
BvGT14	MRE	AACCTAA	1324	7	+	Petroselinum crispum	MYB binding site involved in light responsiveness	Light responsive elements
BvGT14	TCCC-motif	TCTCCCT	72	7	-	Spinacia oleracea	part of a light responsive element	Light responsive elements
BvGT14	TCCC-motif	TCTCCCT	799	7	+	Spinacia oleracea	part of a light responsive element	Light responsive elements
BvGT14		motif_sequence	68	4	-	organism	short_function	Other elements
BvGT14		motif_sequence	109	4	-	organism	short_function	Other elements
BvGT14		motif_sequence	132	4	-	organism	short_function	Other elements
BvGT14		motif_sequence	672	4	+	organism	short_function	Other elements
BvGT14		motif_sequence	720	4	+	organism	short_function	Other elements
BvGT14		motif_sequence	730	4	-	organism	short_function	Other elements
BvGT14		motif_sequence	750	4	+	organism	short_function	Other elements
BvGT14		motif_sequence	816	4	+	organism	short_function	Other elements
BvGT14		motif_sequence	843	4	+	organism	short_function	Other elements
BvGT14		motif_sequence	1081	4	-	organism	short_function	Other elements
BvGT14		motif_sequence	1188	4	+	organism	short_function	Other elements
BvGT14		motif_sequence	1190	4	-	organism	short_function	Other elements
BvGT14		motif_sequence	1337	4	+	organism	short_function	Other elements
BvGT14		motif_sequence	1378	4	-	organism	short_function	Other elements
BvGT14		motif_sequence	1461	4	-	organism	short_function	Other elements
BvGT14		motif_sequence	1491	4	+	organism	short_function	Other elements
BvGT14		motif_sequence	1493	4	-	organism	short_function	Other elements
BvGT14		motif_sequence	1649	4	-	organism	short_function	Other elements
BvGT14		motif_sequence	1679	4	+	organism	short_function	Other elements
BvGT14		motif_sequence	1718	4	+	organism	short_function	Other elements
BvGT14		motif_sequence	1745	4	-	organism	short_function	Other elements
BvGT14	as-1	TGACG	115	5	+	Arabidopsis thaliana		Site-binding related elements
BvGT14	CGTCA-motif	CGTCA	115	5	-	Hordeum vulgare	cis-acting regulatory element involved in the MeJA-responsiveness	Hormone responsive elements
BvGT14	GARE-motif	TCTGTTG	1562	7	+	Brassica oleracea	gibberellin-responsive element	Hormone responsive elements
BvGT14	WUN-motif	AAATTACT	642	8	+	Nicotiana glutinosa	wound-responsive element	wound-responsive element
BvGT14	TATA	TATAAAAT	333	8	+	Arabidopsis thaliana		Other elements
BvGT14	I-box	cCATATCCAAT	573	10	-	Flaveria trinervia	part of a light responsive element	Light responsive elements
BvGT14	GA-motif	ATAGATAA	1000	8	-	Arabidopsis thaliana	part of a light responsive element	Light responsive elements
BvGT14	Myb	CAACTG	1433	6	-	Arabidopsis thaliana		Other elements
BvGT14	Myb	TAACTG	1546	6	-	Arabidopsis thaliana		Other elements
BvGT14	AT~TATA-box	TATATA	464	6	+	Arabidopsis thaliana	Site-binding related elements	Promoter related element
BvGT14	AT~TATA-box	TATATA	990	6	+	Arabidopsis thaliana	Site-binding related elements	Promoter related element
BvGT14	CAAT-box	CAAAT	154	5	-	Pisum sativum	common cis-acting element in promoter and enhancer regions	Site-binding related elements
BvGT14	CAAT-box	CAAAT	169	5	-	Pisum sativum	common cis-acting element in promoter and enhancer regions	Site-binding related elements
BvGT14	CAAT-box	CCAAT	212	5	+	Arabidopsis thaliana	common cis-acting element in promoter and enhancer regions	Site-binding related elements
BvGT14	CAAT-box	CAAT	213	4	+	Nicotiana glutinosa	common cis-acting element in promoter and enhancer regions	Site-binding related elements
BvGT14	CAAT-box	CCAAT	292	5	+	Arabidopsis thaliana	common cis-acting element in promoter and enhancer regions	Site-binding related elements
BvGT14	CAAT-box	CAAT	293	4	+	Nicotiana glutinosa	common cis-acting element in promoter and enhancer regions	Site-binding related elements
BvGT14	CAAT-box	CAAAT	370	5	-	Pisum sativum	common cis-acting element in promoter and enhancer regions	Site-binding related elements
BvGT14	CAAT-box	CAAAT	517	5	-	Pisum sativum	common cis-acting element in promoter and enhancer regions	Site-binding related elements
BvGT14	CAAT-box	CCAAT	532	5	-	Arabidopsis thaliana	common cis-acting element in promoter and enhancer regions	Site-binding related elements
BvGT14	CAAT-box	CAAT	555	4	+	Nicotiana glutinosa	common cis-acting element in promoter and enhancer regions	Site-binding related elements
BvGT14	CAAT-box	CAAAT	566	5	-	Pisum sativum	common cis-acting element in promoter and enhancer regions	Site-binding related elements
BvGT14	CAAT-box	CCAAT	573	5	-	Arabidopsis thaliana	common cis-acting element in promoter and enhancer regions	Site-binding related elements
BvGT14	CAAT-box	CAAAT	578	5	-	Pisum sativum	common cis-acting element in promoter and enhancer regions	Site-binding related elements
BvGT14	CAAT-box	CCAAT	586	5	+	Arabidopsis thaliana	common cis-acting element in promoter and enhancer regions	Site-binding related elements
BvGT14	CAAT-box	CAAT	587	4	+	Nicotiana glutinosa	common cis-acting element in promoter and enhancer regions	Site-binding related elements
BvGT14	CAAT-box	CAAAT	626	5	-	Pisum sativum	common cis-acting element in promoter and enhancer regions	Site-binding related elements
BvGT14	CAAT-box	CAAAT	653	5	-	Pisum sativum	common cis-acting element in promoter and enhancer regions	Site-binding related elements
BvGT14	CAAT-box	CCAAT	727	5	-	Arabidopsis thaliana	common cis-acting element in promoter and enhancer regions	Site-binding related elements
BvGT14	CAAT-box	CAAT	795	4	-	Nicotiana glutinosa	common cis-acting element in promoter and enhancer regions	Site-binding related elements
BvGT14	CAAT-box	CAAT	855	4	-	Nicotiana glutinosa	common cis-acting element in promoter and enhancer regions	Site-binding related elements
BvGT14	CAAT-box	CAAT	887	4	+	Nicotiana glutinosa	common cis-acting element in promoter and enhancer regions	Site-binding related elements
BvGT14	CAAT-box	CAAAT	911	5	-	Pisum sativum	common cis-acting element in promoter and enhancer regions	Site-binding related elements
BvGT14	CAAT-box	CAAT	923	4	-	Nicotiana glutinosa	common cis-acting element in promoter and enhancer regions	Site-binding related elements
BvGT14	CAAT-box	CAAT	947	4	-	Nicotiana glutinosa	common cis-acting element in promoter and enhancer regions	Site-binding related elements
BvGT14	CAAT-box	CAAT	970	4	-	Nicotiana glutinosa	common cis-acting element in promoter and enhancer regions	Site-binding related elements
BvGT14	CAAT-box	CAAT	974	4	-	Nicotiana glutinosa	common cis-acting element in promoter and enhancer regions	Site-binding related elements
BvGT14	CAAT-box	CAAT	1038	4	-	Nicotiana glutinosa	common cis-acting element in promoter and enhancer regions	Site-binding related elements
BvGT14	CAAT-box	CAAT	1042	4	+	Nicotiana glutinosa	common cis-acting element in promoter and enhancer regions	Site-binding related elements
BvGT14	CAAT-box	CAAT	1044	4	-	Nicotiana glutinosa	common cis-acting element in promoter and enhancer regions	Site-binding related elements
BvGT14	CAAT-box	CAAT	1143	4	-	Nicotiana glutinosa	common cis-acting element in promoter and enhancer regions	Site-binding related elements
BvGT14	CAAT-box	CAAT	1176	4	+	Nicotiana glutinosa	common cis-acting element in promoter and enhancer regions	Site-binding related elements
BvGT14	CAAT-box	CAAT	1183	4	+	Nicotiana glutinosa	common cis-acting element in promoter and enhancer regions	Site-binding related elements
BvGT14	CAAT-box	CAAT	1245	4	-	Nicotiana glutinosa	common cis-acting element in promoter and enhancer regions	Site-binding related elements
BvGT14	CAAT-box	CAAAT	1288	5	+	Pisum sativum	common cis-acting element in promoter and enhancer regions	Site-binding related elements
BvGT14	CAAT-box	CAAAT	1346	5	+	Pisum sativum	common cis-acting element in promoter and enhancer regions	Site-binding related elements
BvGT14	CAAT-box	CCAAT	1444	5	-	Arabidopsis thaliana	common cis-acting element in promoter and enhancer regions	Site-binding related elements
BvGT14	CAAT-box	CAAAT	1470	5	+	Pisum sativum	common cis-acting element in promoter and enhancer regions	Site-binding related elements
BvGT14	CAAT-box	CAAT	1497	4	-	Nicotiana glutinosa	common cis-acting element in promoter and enhancer regions	Site-binding related elements
BvGT14	CAAT-box	CAAAT	1521	5	+	Pisum sativum	common cis-acting element in promoter and enhancer regions	Site-binding related elements
BvGT14	CAAT-box	CAAT	1530	4	-	Nicotiana glutinosa	common cis-acting element in promoter and enhancer regions	Site-binding related elements
BvGT14	CAAT-box	CCAAT	1534	5	+	Arabidopsis thaliana	common cis-acting element in promoter and enhancer regions	Site-binding related elements
BvGT14	CAAT-box	CAAT	1535	4	+	Nicotiana glutinosa	common cis-acting element in promoter and enhancer regions	Site-binding related elements
BvGT14	CAAT-box	CCAAT	1608	5	-	Arabidopsis thaliana	common cis-acting element in promoter and enhancer regions	Site-binding related elements
BvGT14	CAAT-box	CAAAT	1691	5	+	Pisum sativum	common cis-acting element in promoter and enhancer regions	Site-binding related elements
BvGT14	CAAT-box	CAAAT	1754	5	+	Pisum sativum	common cis-acting element in promoter and enhancer regions	Site-binding related elements
BvGT14	CAAT-box	CAAT	1780	4	+	Nicotiana glutinosa	common cis-acting element in promoter and enhancer regions	Site-binding related elements
BvGT14	CAAT-box	CAAT	1958	4	+	Nicotiana glutinosa	common cis-acting element in promoter and enhancer regions	Site-binding related elements
BvGT14	CAAT-box	CAAAT	1992	5	-	Pisum sativum	common cis-acting element in promoter and enhancer regions	Site-binding related elements
BvGT14	Myb-binding site	CAACAG	1484	6	-	Nicotiana tabacum		Site-binding related elements
BvGT14	Myb-binding site	CAACAG	1563	6	-	Nicotiana tabacum		Site-binding related elements
BvGT14	TGACG-motif	TGACG	115	5	+	Hordeum vulgare	cis-acting regulatory element involved in the MeJA-responsiveness	Hormone responsive elements
BvGT14	ARE	AAACCA	764	6	-	Zea mays	cis-acting regulatory element essential for the anaerobic induction	Environmental stress-related element
BvGT14	ARE	AAACCA	879	6	-	Zea mays	cis-acting regulatory element essential for the anaerobic induction	Environmental stress-related element
BvGT14	ARE	AAACCA	1846	6	-	Zea mays	cis-acting regulatory element essential for the anaerobic induction	Environmental stress-related element
BvGT14	TATA-box	TATAAATA	186	8	-	Daucus carota	core promoter element around -30 of transcription start	Promoter related element
BvGT14	TATA-box	TATAAAT	187	7	-	Brassica juncea	core promoter element around -30 of transcription start	Promoter related element
BvGT14	TATA-box	TATAAA	188	6	-	Helianthus annuus	core promoter element around -30 of transcription start	Promoter related element
BvGT14	TATA-box	TATAA	189	5	-	Arabidopsis thaliana	core promoter element around -30 of transcription start	Promoter related element
BvGT14	TATA-box	TATA	190	4	+	Arabidopsis thaliana	core promoter element around -30 of transcription start	Promoter related element
BvGT14	TATA-box	TATAA	332	5	-	Arabidopsis thaliana	core promoter element around -30 of transcription start	Promoter related element
BvGT14	TATA-box	TATA	333	4	+	Arabidopsis thaliana	core promoter element around -30 of transcription start	Promoter related element
BvGT14	TATA-box	ATTATA	436	6	+	Brassica napus	core promoter element around -30 of transcription start	Promoter related element
BvGT14	TATA-box	TATAA	437	5	-	Arabidopsis thaliana	core promoter element around -30 of transcription start	Promoter related element
BvGT14	TATA-box	TATA	438	4	+	Arabidopsis thaliana	core promoter element around -30 of transcription start	Promoter related element
BvGT14	TATA-box	TATATTTATATTT	463	12	-	Avena sativa	core promoter element around -30 of transcription start	Promoter related element
BvGT14	TATA-box	TATATA	464	6	+	Arabidopsis thaliana	core promoter element around -30 of transcription start	Promoter related element
BvGT14	TATA-box	ATATAA	465	6	+	Brassica oleracea	core promoter element around -30 of transcription start	Promoter related element
BvGT14	TATA-box	TATA	466	4	+	Arabidopsis thaliana	core promoter element around -30 of transcription start	Promoter related element
BvGT14	TATA-box	TATA	472	4	+	Arabidopsis thaliana	core promoter element around -30 of transcription start	Promoter related element
BvGT14	TATA-box	ATATAT	483	6	+	Brassica napus	core promoter element around -30 of transcription start	Promoter related element
BvGT14	TATA-box	TATA	484	4	+	Arabidopsis thaliana	core promoter element around -30 of transcription start	Promoter related element
BvGT14	TATA-box	TATA	608	4	+	Arabidopsis thaliana	core promoter element around -30 of transcription start	Promoter related element
BvGT14	TATA-box	TATAA	939	5	-	Arabidopsis thaliana	core promoter element around -30 of transcription start	Promoter related element
BvGT14	TATA-box	TATA	940	4	+	Arabidopsis thaliana	core promoter element around -30 of transcription start	Promoter related element
BvGT14	TATA-box	TATATA	990	6	+	Arabidopsis thaliana	core promoter element around -30 of transcription start	Promoter related element
BvGT14	TATA-box	ATATAT	991	6	+	Brassica napus	core promoter element around -30 of transcription start	Promoter related element
BvGT14	TATA-box	TATA	992	4	+	Arabidopsis thaliana	core promoter element around -30 of transcription start	Promoter related element
BvGT14	TATA-box	TATA	1005	4	-	Arabidopsis thaliana	core promoter element around -30 of transcription start	Promoter related element
BvGT14	TATA-box	TATAAA	1091	6	-	Helianthus annuus	core promoter element around -30 of transcription start	Promoter related element
BvGT14	TATA-box	TATAA	1092	5	-	Arabidopsis thaliana	core promoter element around -30 of transcription start	Promoter related element
BvGT14	TATA-box	TATA	1093	4	-	Arabidopsis thaliana	core promoter element around -30 of transcription start	Promoter related element
BvGT14	TATA-box	TATA	1260	4	-	Arabidopsis thaliana	core promoter element around -30 of transcription start	Promoter related element
BvGT14	TATA-box	ATATAA	1382	6	+	Brassica oleracea	core promoter element around -30 of transcription start	Promoter related element
BvGT14	TATA-box	TATA	1383	4	-	Arabidopsis thaliana	core promoter element around -30 of transcription start	Promoter related element
BvGT14	TATA-box	ATATAA	1451	6	+	Brassica oleracea	core promoter element around -30 of transcription start	Promoter related element
BvGT14	TATA-box	TATA	1452	4	-	Arabidopsis thaliana	core promoter element around -30 of transcription start	Promoter related element
BvGT14	TATA-box	TATA	1574	4	-	Arabidopsis thaliana	core promoter element around -30 of transcription start	Promoter related element
BvGT14	TATA-box	TATAA	1666	5	-	Arabidopsis thaliana	core promoter element around -30 of transcription start	Promoter related element
BvGT14	TATA-box	TATA	1667	4	-	Arabidopsis thaliana	core promoter element around -30 of transcription start	Promoter related element
BvGT14	TATA-box	TATAA	1735	5	-	Arabidopsis thaliana	core promoter element around -30 of transcription start	Promoter related element
BvGT14	TATA-box	TATA	1736	4	-	Arabidopsis thaliana	core promoter element around -30 of transcription start	Promoter related element
BvGT14	TATA-box	TATA	1788	4	-	Arabidopsis thaliana	core promoter element around -30 of transcription start	Promoter related element
BvGT14	TATA-box	ATATAT	1858	6	-	Brassica napus	core promoter element around -30 of transcription start	Promoter related element
BvGT14	TATA-box	TATA	1859	4	-	Arabidopsis thaliana	core promoter element around -30 of transcription start	Promoter related element
BvGT14	TATA-box	TATA	1919	4	-	Arabidopsis thaliana	core promoter element around -30 of transcription start	Promoter related element
BvGT14	TATA-box	ATTATA	1962	6	+	Brassica napus	core promoter element around -30 of transcription start	Promoter related element
BvGT14	TATA-box	TATAA	1963	5	-	Arabidopsis thaliana	core promoter element around -30 of transcription start	Promoter related element
BvGT14	TATA-box	TATA	1964	4	-	Arabidopsis thaliana	core promoter element around -30 of transcription start	Promoter related element
BvGT14	STRE	AGGGG	125	5	+	Arabidopsis thaliana	Stress response element	Environmental stress-related element
BvGT14	MBS	CAACTG	1433	6	-	Arabidopsis thaliana	MYB binding site involved in drought-inducibility	Environmental stress-related element
BvGT14	DRE core	GCCGAC	15	6	-	Arabidopsis thaliana	Dehydration Response Element (DRE)	Environmental stress-related element
BvGT14	Unnamed__4	CTCC	44	4	-	Petroselinum hortense		Other elements
BvGT14	Unnamed__4	CTCC	47	4	-	Petroselinum hortense		Other elements
BvGT14	Unnamed__4	CTCC	68	4	-	Petroselinum hortense		Other elements
BvGT14	Unnamed__4	CTCC	74	4	-	Petroselinum hortense		Other elements
BvGT14	Unnamed__4	CTCC	109	4	-	Petroselinum hortense		Other elements
BvGT14	Unnamed__4	CTCC	128	4	-	Petroselinum hortense		Other elements
BvGT14	Unnamed__4	CTCC	219	4	-	Petroselinum hortense		Other elements
BvGT14	Unnamed__4	CTCC	318	4	+	Petroselinum hortense		Other elements
BvGT14	Unnamed__4	CTCC	730	4	-	Petroselinum hortense		Other elements
BvGT14	Unnamed__4	CTCC	752	4	+	Petroselinum hortense		Other elements
BvGT14	Unnamed__4	CTCC	800	4	+	Petroselinum hortense		Other elements
BvGT14	Unnamed__4	CTCC	818	4	+	Petroselinum hortense		Other elements
BvGT14	Unnamed__4	CTCC	845	4	+	Petroselinum hortense		Other elements
BvGT14	Unnamed__4	CTCC	1104	4	-	Petroselinum hortense		Other elements
BvGT14	Unnamed__4	CTCC	1390	4	-	Petroselinum hortense		Other elements
BvGT14	Unnamed__4	CTCC	1611	4	-	Petroselinum hortense		Other elements
BvGT14	Unnamed__4	CTCC	1821	4	+	Petroselinum hortense		Other elements
BvGT14	MYB-like sequence	TAACCA	1732	6	-	Arabidopsis thaliana		Other elements
BvGT14	MYB-like sequence	TAACCA	1835	6	-	Arabidopsis thaliana		Other elements
BvGT14	Gap-box	CAAATGAA(A/G)A	1521	9.5	+	Arabidopsis thaliana	part of a light responsive element	Light responsive elements
BvGT14	TC-rich repeats	ATTCTCTAAC	282	9	+	Nicotiana tabacum	cis-acting element involved in defense and stress responsiveness	Environmental stress-related element
BvGT14	Unnamed__2	AACCTAACCT	1319	9	+	Petroselinum hortense		Other elements
BvGT14	MYB	CAACCA	931	6	-	Arabidopsis thaliana		Other elements
BvGT14	MYB	CAACAG	1484	6	-	Arabidopsis thaliana		Other elements
BvGT14	MYB	CAACAG	1563	6	-	Arabidopsis thaliana		Other elements
BvGT14	MYB	TAACCA	1732	6	-	Arabidopsis thaliana		Other elements
BvGT14	MYB	TAACCA	1835	6	-	Arabidopsis thaliana		Other elements
BvGT14	MYB	CAACCA	1912	6	-	Arabidopsis thaliana		Other elements
BvGT14	GATT-motif	CTCCTGATTGGA	211	11	-	Oryza sativa	part of a light responsive element	Light responsive elements
BvGT15	Unnamed__4	CTCC	69	4	-	Petroselinum hortense		Other elements
BvGT15	Unnamed__4	CTCC	109	4	-	Petroselinum hortense		Other elements
BvGT15	Unnamed__4	CTCC	178	4	+	Petroselinum hortense		Other elements
BvGT15	Unnamed__4	CTCC	777	4	+	Petroselinum hortense		Other elements
BvGT15	Unnamed__4	CTCC	1727	4	-	Petroselinum hortense		Other elements
BvGT15	TC-rich repeats	GTTTTCTTAC	344	9	+	Nicotiana tabacum	cis-acting element involved in defense and stress responsiveness	Environmental stress-related element
BvGT15	MYB-like sequence	TAACCA	281	6	+	Arabidopsis thaliana		Other elements
BvGT15	MYB	TAACCA	281	6	+	Arabidopsis thaliana		Other elements
BvGT15	MYB	CAACAG	1105	6	-	Arabidopsis thaliana		Other elements
BvGT15	MYB	CAACCA	1551	6	-	Arabidopsis thaliana		Other elements
BvGT15	MYB	CAACAG	1731	6	-	Arabidopsis thaliana		Other elements
BvGT15	AuxRR-core	GGTCCAT	1535	7	-	Nicotiana tabacum	cis-acting regulatory element involved in auxin responsiveness	Hormone responsive elements
BvGT15	TCA-element	TCAGAAGAGG	629	9	-	Brassica oleracea	cis-acting element involved in salicylic acid responsiveness	Hormone responsive elements
BvGT15	ARE	AAACCA	126	6	+	Zea mays	cis-acting regulatory element essential for the anaerobic induction	Environmental stress-related element
BvGT15	ARE	AAACCA	289	6	+	Zea mays	cis-acting regulatory element essential for the anaerobic induction	Environmental stress-related element
BvGT15	ARE	AAACCA	1308	6	+	Zea mays	cis-acting regulatory element essential for the anaerobic induction	Environmental stress-related element
BvGT15	ARE	AAACCA	1964	6	-	Zea mays	cis-acting regulatory element essential for the anaerobic induction	Environmental stress-related element
BvGT15	TATA-box	ATATAT	131	6	+	Brassica napus	core promoter element around -30 of transcription start	Promoter related element
BvGT15	TATA-box	TATA	132	4	+	Arabidopsis thaliana	core promoter element around -30 of transcription start	Promoter related element
BvGT15	TATA-box	TATA	237	4	+	Arabidopsis thaliana	core promoter element around -30 of transcription start	Promoter related element
BvGT15	TATA-box	ccTATAAAaa	383	9	-	Arabidopsis thaliana	core promoter element around -30 of transcription start	Promoter related element
BvGT15	TATA-box	TATAAAA	384	7	-	Pisum sativum	core promoter element around -30 of transcription start	Promoter related element
BvGT15	TATA-box	TATAAA	385	6	-	Helianthus annuus	core promoter element around -30 of transcription start	Promoter related element
BvGT15	TATA-box	TATAA	386	5	-	Arabidopsis thaliana	core promoter element around -30 of transcription start	Promoter related element
BvGT15	TATA-box	TATA	387	4	+	Arabidopsis thaliana	core promoter element around -30 of transcription start	Promoter related element
BvGT15	TATA-box	TATAA	398	5	-	Arabidopsis thaliana	core promoter element around -30 of transcription start	Promoter related element
BvGT15	TATA-box	TATA	399	4	+	Arabidopsis thaliana	core promoter element around -30 of transcription start	Promoter related element
BvGT15	TATA-box	TATAAAA	409	7	-	Pisum sativum	core promoter element around -30 of transcription start	Promoter related element
BvGT15	TATA-box	TATAAA	410	6	-	Helianthus annuus	core promoter element around -30 of transcription start	Promoter related element
BvGT15	TATA-box	TATAA	411	5	-	Arabidopsis thaliana	core promoter element around -30 of transcription start	Promoter related element
BvGT15	TATA-box	TATA	412	4	+	Arabidopsis thaliana	core promoter element around -30 of transcription start	Promoter related element
BvGT15	TATA-box	TATA	541	4	+	Arabidopsis thaliana	core promoter element around -30 of transcription start	Promoter related element
BvGT15	TATA-box	TATAA	559	5	-	Arabidopsis thaliana	core promoter element around -30 of transcription start	Promoter related element
BvGT15	TATA-box	TATA	560	4	+	Arabidopsis thaliana	core promoter element around -30 of transcription start	Promoter related element
BvGT15	TATA-box	TATAAAA	617	7	-	Pisum sativum	core promoter element around -30 of transcription start	Promoter related element
BvGT15	TATA-box	TATAAA	618	6	-	Helianthus annuus	core promoter element around -30 of transcription start	Promoter related element
BvGT15	TATA-box	TATAA	619	5	-	Arabidopsis thaliana	core promoter element around -30 of transcription start	Promoter related element
BvGT15	TATA-box	TATA	620	4	+	Arabidopsis thaliana	core promoter element around -30 of transcription start	Promoter related element
BvGT15	TATA-box	TATA	833	4	+	Arabidopsis thaliana	core promoter element around -30 of transcription start	Promoter related element
BvGT15	TATA-box	TATAAAT	1011	7	-	Brassica juncea	core promoter element around -30 of transcription start	Promoter related element
BvGT15	TATA-box	TATAAA	1012	6	-	Helianthus annuus	core promoter element around -30 of transcription start	Promoter related element
BvGT15	TATA-box	TATAA	1013	5	-	Arabidopsis thaliana	core promoter element around -30 of transcription start	Promoter related element
BvGT15	TATA-box	TATA	1014	4	-	Arabidopsis thaliana	core promoter element around -30 of transcription start	Promoter related element
BvGT15	TATA-box	ATATAT	1351	6	-	Brassica napus	core promoter element around -30 of transcription start	Promoter related element
BvGT15	TATA-box	TATA	1352	4	-	Arabidopsis thaliana	core promoter element around -30 of transcription start	Promoter related element
BvGT15	TATA-box	ATATAT	1358	6	-	Brassica napus	core promoter element around -30 of transcription start	Promoter related element
BvGT15	TATA-box	TATA	1359	4	-	Arabidopsis thaliana	core promoter element around -30 of transcription start	Promoter related element
BvGT15	TATA-box	ATATAA	1401	6	+	Brassica oleracea	core promoter element around -30 of transcription start	Promoter related element
BvGT15	TATA-box	TATA	1402	4	-	Arabidopsis thaliana	core promoter element around -30 of transcription start	Promoter related element
BvGT15	TATA-box	ATATAA	1632	6	+	Brassica oleracea	core promoter element around -30 of transcription start	Promoter related element
BvGT15	TATA-box	TATA	1633	4	-	Arabidopsis thaliana	core promoter element around -30 of transcription start	Promoter related element
BvGT15	TATA-box	TATA	1639	4	-	Arabidopsis thaliana	core promoter element around -30 of transcription start	Promoter related element
BvGT15	TATA-box	TATA	1795	4	-	Arabidopsis thaliana	core promoter element around -30 of transcription start	Promoter related element
BvGT15	TATA-box	ATATAT	1823	6	-	Brassica napus	core promoter element around -30 of transcription start	Promoter related element
BvGT15	TATA-box	TATATA	1824	6	-	Arabidopsis thaliana	core promoter element around -30 of transcription start	Promoter related element
BvGT15	TATA-box	ATATAT	1825	6	-	Brassica napus	core promoter element around -30 of transcription start	Promoter related element
BvGT15	TATA-box	TATA	1826	4	-	Arabidopsis thaliana	core promoter element around -30 of transcription start	Promoter related element
BvGT15	MBS	CAACTG	683	6	-	Arabidopsis thaliana	MYB binding site involved in drought-inducibility	Environmental stress-related element
BvGT15	MBS	CAACTG	1722	6	+	Arabidopsis thaliana	MYB binding site involved in drought-inducibility	Environmental stress-related element
BvGT15	STRE	AGGGG	41	5	+	Arabidopsis thaliana	Stress response element	Environmental stress-related element
BvGT15	STRE	AGGGG	71	5	+	Arabidopsis thaliana	Stress response element	Environmental stress-related element
BvGT15	STRE	AGGGG	768	5	-	Arabidopsis thaliana	Stress response element	Environmental stress-related element
BvGT15	STRE	AGGGG	1540	5	-	Arabidopsis thaliana	Stress response element	Environmental stress-related element
BvGT15	GT1-motif	GGTTAA	280	6	-	Arabidopsis thaliana	light responsive element	Light responsive elements
BvGT15	GT1-motif	GGTTAA	653	6	-	Arabidopsis thaliana	light responsive element	Light responsive elements
BvGT15	GT1-motif	GGTTAAT	924	7	+	Avena sativa	light responsive element	Light responsive elements
BvGT15	CAAT-box	CAAT	228	4	-	Nicotiana glutinosa	common cis-acting element in promoter and enhancer regions	Site-binding related elements
BvGT15	CAAT-box	CAAT	314	4	-	Nicotiana glutinosa	common cis-acting element in promoter and enhancer regions	Site-binding related elements
BvGT15	CAAT-box	CAAT	325	4	+	Nicotiana glutinosa	common cis-acting element in promoter and enhancer regions	Site-binding related elements
BvGT15	CAAT-box	CAAAT	415	5	-	Pisum sativum	common cis-acting element in promoter and enhancer regions	Site-binding related elements
BvGT15	CAAT-box	CCAAT	426	5	+	Arabidopsis thaliana	common cis-acting element in promoter and enhancer regions	Site-binding related elements
BvGT15	CAAT-box	CAAT	427	4	+	Nicotiana glutinosa	common cis-acting element in promoter and enhancer regions	Site-binding related elements
BvGT15	CAAT-box	CCAAT	445	5	+	Arabidopsis thaliana	common cis-acting element in promoter and enhancer regions	Site-binding related elements
BvGT15	CAAT-box	CAAT	446	4	+	Nicotiana glutinosa	common cis-acting element in promoter and enhancer regions	Site-binding related elements
BvGT15	CAAT-box	CAAAT	451	5	+	Pisum sativum	common cis-acting element in promoter and enhancer regions	Site-binding related elements
BvGT15	CAAT-box	CCAAT	466	5	+	Arabidopsis thaliana	common cis-acting element in promoter and enhancer regions	Site-binding related elements
BvGT15	CAAT-box	CAAT	467	4	+	Nicotiana glutinosa	common cis-acting element in promoter and enhancer regions	Site-binding related elements
BvGT15	CAAT-box	CAAAT	481	5	-	Pisum sativum	common cis-acting element in promoter and enhancer regions	Site-binding related elements
BvGT15	CAAT-box	CAAT	489	4	+	Nicotiana glutinosa	common cis-acting element in promoter and enhancer regions	Site-binding related elements
BvGT15	CAAT-box	CAAT	546	4	-	Nicotiana glutinosa	common cis-acting element in promoter and enhancer regions	Site-binding related elements
BvGT15	CAAT-box	CAAT	572	4	+	Nicotiana glutinosa	common cis-acting element in promoter and enhancer regions	Site-binding related elements
BvGT15	CAAT-box	CAAAT	574	5	-	Pisum sativum	common cis-acting element in promoter and enhancer regions	Site-binding related elements
BvGT15	CAAT-box	CAAT	649	4	+	Nicotiana glutinosa	common cis-acting element in promoter and enhancer regions	Site-binding related elements
BvGT15	CAAT-box	CCCAATTT	740	8	+	Arabidopsis thaliana	common cis-acting element in promoter and enhancer regions	Site-binding related elements
BvGT15	CAAT-box	CCAAT	741	5	+	Arabidopsis thaliana	common cis-acting element in promoter and enhancer regions	Site-binding related elements
BvGT15	CAAT-box	CAAT	742	4	+	Nicotiana glutinosa	common cis-acting element in promoter and enhancer regions	Site-binding related elements
BvGT15	CAAT-box	CAAT	783	4	+	Nicotiana glutinosa	common cis-acting element in promoter and enhancer regions	Site-binding related elements
BvGT15	CAAT-box	CAAT	863	4	+	Nicotiana glutinosa	common cis-acting element in promoter and enhancer regions	Site-binding related elements
BvGT15	CAAT-box	CAAT	880	4	-	Nicotiana glutinosa	common cis-acting element in promoter and enhancer regions	Site-binding related elements
BvGT15	CAAT-box	CAAT	997	4	+	Nicotiana glutinosa	common cis-acting element in promoter and enhancer regions	Site-binding related elements
BvGT15	CAAT-box	CAAT	1021	4	-	Nicotiana glutinosa	common cis-acting element in promoter and enhancer regions	Site-binding related elements
BvGT15	CAAT-box	CAAT	1030	4	-	Nicotiana glutinosa	common cis-acting element in promoter and enhancer regions	Site-binding related elements
BvGT15	CAAT-box	CAAAT	1059	5	-	Pisum sativum	common cis-acting element in promoter and enhancer regions	Site-binding related elements
BvGT15	CAAT-box	CAAT	1079	4	-	Nicotiana glutinosa	common cis-acting element in promoter and enhancer regions	Site-binding related elements
BvGT15	CAAT-box	CAAT	1160	4	-	Nicotiana glutinosa	common cis-acting element in promoter and enhancer regions	Site-binding related elements
BvGT15	CAAT-box	CAAT	1182	4	-	Nicotiana glutinosa	common cis-acting element in promoter and enhancer regions	Site-binding related elements
BvGT15	CAAT-box	CAAAT	1197	5	-	Pisum sativum	common cis-acting element in promoter and enhancer regions	Site-binding related elements
BvGT15	CAAT-box	CAAT	1207	4	-	Nicotiana glutinosa	common cis-acting element in promoter and enhancer regions	Site-binding related elements
BvGT15	CAAT-box	CAAT	1304	4	+	Nicotiana glutinosa	common cis-acting element in promoter and enhancer regions	Site-binding related elements
BvGT15	CAAT-box	CAAT	1478	4	+	Nicotiana glutinosa	common cis-acting element in promoter and enhancer regions	Site-binding related elements
BvGT15	CAAT-box	CAAT	1485	4	+	Nicotiana glutinosa	common cis-acting element in promoter and enhancer regions	Site-binding related elements
BvGT15	CAAT-box	CAAT	1509	4	+	Nicotiana glutinosa	common cis-acting element in promoter and enhancer regions	Site-binding related elements
BvGT15	CAAT-box	CAAT	1523	4	+	Nicotiana glutinosa	common cis-acting element in promoter and enhancer regions	Site-binding related elements
BvGT15	CAAT-box	CAAT	1682	4	+	Nicotiana glutinosa	common cis-acting element in promoter and enhancer regions	Site-binding related elements
BvGT15	CAAT-box	CAAT	1715	4	-	Nicotiana glutinosa	common cis-acting element in promoter and enhancer regions	Site-binding related elements
BvGT15	CAAT-box	CAAT	1785	4	-	Nicotiana glutinosa	common cis-acting element in promoter and enhancer regions	Site-binding related elements
BvGT15	CAAT-box	CAAT	1914	4	+	Nicotiana glutinosa	common cis-acting element in promoter and enhancer regions	Site-binding related elements
BvGT15	CAAT-box	CAAT	1945	4	-	Nicotiana glutinosa	common cis-acting element in promoter and enhancer regions	Site-binding related elements
BvGT15	Myb-binding site	CAACAG	1105	6	-	Nicotiana tabacum		Site-binding related elements
BvGT15	Myb-binding site	CAACAG	1731	6	-	Nicotiana tabacum		Site-binding related elements
BvGT15	TGACG-motif	TGACG	848	5	+	Hordeum vulgare	cis-acting regulatory element involved in the MeJA-responsiveness	Hormone responsive elements
BvGT15	TGACG-motif	TGACG	994	5	-	Hordeum vulgare	cis-acting regulatory element involved in the MeJA-responsiveness	Hormone responsive elements
BvGT15	W box	TTGACC	1970	6	+	Arabidopsis thaliana		Environmental stress-related element
BvGT15	TCT-motif	TCTTAC	348	6	+	Arabidopsis thaliana	part of a light responsive element	Light responsive elements
BvGT15	TATA	TATAAAAT	408	8	-	Arabidopsis thaliana		Other elements
BvGT15	TATA	TATAAAAT	616	8	-	Arabidopsis thaliana		Other elements
BvGT15	I-box	cCATATCCAAT	735	10	+	Flaveria trinervia	part of a light responsive element	Light responsive elements
BvGT15	GA-motif	ATAGATAA	1760	8	-	Arabidopsis thaliana	part of a light responsive element	Light responsive elements
BvGT15	Myb	CAACTG	683	6	-	Arabidopsis thaliana		Other elements
BvGT15	Myb	CAACTG	1722	6	+	Arabidopsis thaliana		Other elements
BvGT15	AT~TATA-box	TATATA	1824	6	-	Arabidopsis thaliana	Site-binding related elements	Promoter related element
BvGT15		motif_sequence	176	4	+	organism	short_function	Other elements
BvGT15		motif_sequence	357	4	-	organism	short_function	Other elements
BvGT15		motif_sequence	495	4	-	organism	short_function	Other elements
BvGT15		motif_sequence	707	4	-	organism	short_function	Other elements
BvGT15		motif_sequence	713	4	-	organism	short_function	Other elements
BvGT15		motif_sequence	775	4	+	organism	short_function	Other elements
BvGT15		motif_sequence	1295	4	+	organism	short_function	Other elements
BvGT15		motif_sequence	1467	4	-	organism	short_function	Other elements
BvGT15		motif_sequence	1600	4	+	organism	short_function	Other elements
BvGT15		motif_sequence	1684	4	+	organism	short_function	Other elements
BvGT15		motif_sequence	1777	4	-	organism	short_function	Other elements
BvGT15		motif_sequence	1871	4	+	organism	short_function	Other elements
BvGT15		motif_sequence	1924	4	+	organism	short_function	Other elements
BvGT15	G-box	CACGAC	1527	6	-	Zea mays	cis-acting regulatory element involved in light responsiveness	Light responsive elements
BvGT15	as-1	TGACG	848	5	+	Arabidopsis thaliana		Site-binding related elements
BvGT15	as-1	TGACG	994	5	-	Arabidopsis thaliana		Site-binding related elements
BvGT15	CGTCA-motif	CGTCA	848	5	-	Hordeum vulgare	cis-acting regulatory element involved in the MeJA-responsiveness	Hormone responsive elements
BvGT15	CGTCA-motif	CGTCA	994	5	+	Hordeum vulgare	cis-acting regulatory element involved in the MeJA-responsiveness	Hormone responsive elements
BvGT15	GARE-motif	TCTGTTG	1104	7	+	Brassica oleracea	gibberellin-responsive element	Hormone responsive elements
BvGT15	MYC	CATGTG	167	6	-	Arabidopsis thaliana		Other elements
BvGT15	TCCC-motif	TCTCCCT	776	7	+	Spinacia oleracea	part of a light responsive element	Light responsive elements
BvGT15	Unnamed__1	CGTGG	1529	5	+	Zea mays	60K protein binding site	Other elements
BvGT15	MRE	AACCTAA	746	7	-	Petroselinum crispum	MYB binding site involved in light responsiveness	Light responsive elements
BvGT15	AAGAA-motif	GAAAGAA	439	7	-	Avena sativa	Relevant elements of Abscisic acid	Hormone responsive elements
BvGT15	AAGAA-motif	gGTAAAGAAA	814	9	-	Avena sativa	Relevant elements of Abscisic acid	Hormone responsive elements
BvGT15	AT-rich sequence	TAAAATACT	187	9	-	Pisum sativum	element for maximal elicitor-mediated activation (2copies)	Other elements
BvGT15	Box 4	ATTAAT	329	6	+	Petroselinum crispum	part of a conserved DNA module involved in light responsiveness	Light responsive elements
BvGT15	Box 4	ATTAAT	1369	6	-	Petroselinum crispum	part of a conserved DNA module involved in light responsiveness	Light responsive elements
BvGT15	Box 4	ATTAAT	1701	6	-	Petroselinum crispum	part of a conserved DNA module involved in light responsiveness	Light responsive elements
BvGT15	Box 4	ATTAAT	1829	6	-	Petroselinum crispum	part of a conserved DNA module involved in light responsiveness	Light responsive elements
BvGT16	GARE-motif	TCTGTTG	164	7	+	Brassica oleracea	gibberellin-responsive element	Hormone responsive elements
BvGT16		motif_sequence	280	4	-	organism	short_function	Other elements
BvGT16		motif_sequence	796	4	-	organism	short_function	Other elements
BvGT16		motif_sequence	906	4	-	organism	short_function	Other elements
BvGT16		motif_sequence	1012	4	+	organism	short_function	Other elements
BvGT16		motif_sequence	1053	4	-	organism	short_function	Other elements
BvGT16		motif_sequence	1091	4	+	organism	short_function	Other elements
BvGT16		motif_sequence	1514	4	+	organism	short_function	Other elements
BvGT16		motif_sequence	1654	4	+	organism	short_function	Other elements
BvGT16		motif_sequence	1697	4	+	organism	short_function	Other elements
BvGT16	CAT-box	GCCACT	772	6	-	Arabidopsis thaliana	cis-acting regulatory element related to meristem expression	development related elements
BvGT16	CAT-box	GCCACT	1356	6	-	Arabidopsis thaliana	cis-acting regulatory element related to meristem expression	development related elements
BvGT16	A-box	CCGTCC	235	6	+	Petroselinum crispum	cis-acting regulatory element	Promoter related element
BvGT16	MYC	CATTTG	105	6	-	Arabidopsis thaliana		Other elements
BvGT16	MYC	CATTTG	602	6	+	Arabidopsis thaliana		Other elements
BvGT16	MYC	CATTTG	1413	6	-	Arabidopsis thaliana		Other elements
BvGT16	MYC	CATTTG	1594	6	-	Arabidopsis thaliana		Other elements
BvGT16	AAGAA-motif	GAAAGAA	1339	7	+	Avena sativa	Relevant elements of Abscisic acid	Hormone responsive elements
BvGT16	AAGAA-motif	GAAAGAA	1343	7	+	Avena sativa	Relevant elements of Abscisic acid	Hormone responsive elements
BvGT16	CCGTCC-box	CCGTCC	235	6	+	Petroselinum hortense		development related elements
BvGT16	Box 4	ATTAAT	843	6	+	Petroselinum crispum	part of a conserved DNA module involved in light responsiveness	Light responsive elements
BvGT16	Box 4	ATTAAT	1273	6	-	Petroselinum crispum	part of a conserved DNA module involved in light responsiveness	Light responsive elements
BvGT16	Box 4	ATTAAT	1327	6	-	Petroselinum crispum	part of a conserved DNA module involved in light responsiveness	Light responsive elements
BvGT16	MYB	CAACAG	87	6	-	Arabidopsis thaliana		Other elements
BvGT16	MYB	CAACAG	165	6	-	Arabidopsis thaliana		Other elements
BvGT16	MYB	CAACCA	198	6	-	Arabidopsis thaliana		Other elements
BvGT16	MYB	TAACCA	594	6	+	Arabidopsis thaliana		Other elements
BvGT16	MYB	CAACCA	1225	6	+	Arabidopsis thaliana		Other elements
BvGT16	MYB	TAACCA	1825	6	+	Arabidopsis thaliana		Other elements
BvGT16	AT-rich element	ATAGAAATCAA	551	10	+	Glycine max	binding site of AT-rich DNA binding protein (ATBP-1)	Site-binding related elements
BvGT16	TCA-element	CCATCTTTTT	1553	10	+	Nicotiana tabacum	cis-acting element involved in salicylic acid responsiveness	Hormone responsive elements
BvGT16	TCA-element	CCATCTTTTT	1756	9	+	Nicotiana tabacum	cis-acting element involved in salicylic acid responsiveness	Hormone responsive elements
BvGT16	CCGTCC motif	CCGTCC	235	6	+	Nicotiana tabacum		development related elements
BvGT16	Unnamed__4	CTCC	421	4	-	Petroselinum hortense		Other elements
BvGT16	Unnamed__4	CTCC	1000	4	-	Petroselinum hortense		Other elements
BvGT16	Unnamed__4	CTCC	1053	4	-	Petroselinum hortense		Other elements
BvGT16	Unnamed__4	CTCC	1097	4	+	Petroselinum hortense		Other elements
BvGT16	Unnamed__4	CTCC	1377	4	-	Petroselinum hortense		Other elements
BvGT16	Unnamed__4	CTCC	1784	4	+	Petroselinum hortense		Other elements
BvGT16	MYB-like sequence	TAACCA	594	6	+	Arabidopsis thaliana		Other elements
BvGT16	MYB-like sequence	TAACCA	1825	6	+	Arabidopsis thaliana		Other elements
BvGT16	TC-rich repeats	ATTCTCTAAC	146	9	+	Nicotiana tabacum	cis-acting element involved in defense and stress responsiveness	Environmental stress-related element
BvGT16	TC-rich repeats	GTTTTCTTAC	1119	9	+	Nicotiana tabacum	cis-acting element involved in defense and stress responsiveness	Environmental stress-related element
BvGT16	TC-rich repeats	GTTTTCTTAC	1716	9	+	Nicotiana tabacum	cis-acting element involved in defense and stress responsiveness	Environmental stress-related element
BvGT16	GT1-motif	GGTTAAT	592	7	-	Avena sativa	light responsive element	Light responsive elements
BvGT16	GT1-motif	GGTTAA	593	6	-	Arabidopsis thaliana	light responsive element	Light responsive elements
BvGT16	MBS	CAACTG	194	6	+	Arabidopsis thaliana	MYB binding site involved in drought-inducibility	Environmental stress-related element
BvGT16	TATA-box	ATTATA	8	6	+	Brassica napus	core promoter element around -30 of transcription start	Promoter related element
BvGT16	TATA-box	TATAA	9	5	-	Arabidopsis thaliana	core promoter element around -30 of transcription start	Promoter related element
BvGT16	TATA-box	TATA	10	4	+	Arabidopsis thaliana	core promoter element around -30 of transcription start	Promoter related element
BvGT16	TATA-box	TATAA	45	5	-	Arabidopsis thaliana	core promoter element around -30 of transcription start	Promoter related element
BvGT16	TATA-box	TATA	46	4	+	Arabidopsis thaliana	core promoter element around -30 of transcription start	Promoter related element
BvGT16	TATA-box	ccTATAAAaa	354	9	+	Arabidopsis thaliana	core promoter element around -30 of transcription start	Promoter related element
BvGT16	TATA-box	TATAA	355	5	-	Arabidopsis thaliana	core promoter element around -30 of transcription start	Promoter related element
BvGT16	TATA-box	TATA	356	4	+	Arabidopsis thaliana	core promoter element around -30 of transcription start	Promoter related element
BvGT16	TATA-box	TATAAAA	470	7	-	Pisum sativum	core promoter element around -30 of transcription start	Promoter related element
BvGT16	TATA-box	TATAAA	471	6	-	Helianthus annuus	core promoter element around -30 of transcription start	Promoter related element
BvGT16	TATA-box	TATAA	472	5	-	Arabidopsis thaliana	core promoter element around -30 of transcription start	Promoter related element
BvGT16	TATA-box	TATA	473	4	+	Arabidopsis thaliana	core promoter element around -30 of transcription start	Promoter related element
BvGT16	TATA-box	TACATAAA	618	8	-	Oryza sativa	core promoter element around -30 of transcription start	Promoter related element
BvGT16	TATA-box	ATATAA	679	6	+	Brassica oleracea	core promoter element around -30 of transcription start	Promoter related element
BvGT16	TATA-box	TATA	680	4	+	Arabidopsis thaliana	core promoter element around -30 of transcription start	Promoter related element
BvGT16	TATA-box	ccTATAAAaa	720	9	+	Arabidopsis thaliana	core promoter element around -30 of transcription start	Promoter related element
BvGT16	TATA-box	ATATAA	721	6	+	Brassica oleracea	core promoter element around -30 of transcription start	Promoter related element
BvGT16	TATA-box	TATA	722	4	+	Arabidopsis thaliana	core promoter element around -30 of transcription start	Promoter related element
BvGT16	TATA-box	ATATAT	1057	6	-	Brassica napus	core promoter element around -30 of transcription start	Promoter related element
BvGT16	TATA-box	TATA	1058	4	-	Arabidopsis thaliana	core promoter element around -30 of transcription start	Promoter related element
BvGT16	TATA-box	TATA	1282	4	-	Arabidopsis thaliana	core promoter element around -30 of transcription start	Promoter related element
BvGT16	TATA-box	ATATAT	1311	6	-	Brassica napus	core promoter element around -30 of transcription start	Promoter related element
BvGT16	TATA-box	TATA	1312	4	-	Arabidopsis thaliana	core promoter element around -30 of transcription start	Promoter related element
BvGT16	TATA-box	TATA	1370	4	-	Arabidopsis thaliana	core promoter element around -30 of transcription start	Promoter related element
BvGT16	TATA-box	TATAAATA	1921	8	-	Daucus carota	core promoter element around -30 of transcription start	Promoter related element
BvGT16	TATA-box	TATAAAT	1922	7	-	Brassica juncea	core promoter element around -30 of transcription start	Promoter related element
BvGT16	TATA-box	TATAAA	1923	6	-	Helianthus annuus	core promoter element around -30 of transcription start	Promoter related element
BvGT16	TATA-box	TATAA	1924	5	-	Arabidopsis thaliana	core promoter element around -30 of transcription start	Promoter related element
BvGT16	TATA-box	TATA	1925	4	-	Arabidopsis thaliana	core promoter element around -30 of transcription start	Promoter related element
BvGT16	STRE	AGGGG	1770	5	-	Arabidopsis thaliana	Stress response element	Environmental stress-related element
BvGT16	STRE	AGGGG	1957	5	-	Arabidopsis thaliana	Stress response element	Environmental stress-related element
BvGT16	ARE	AAACCA	966	6	-	Zea mays	cis-acting regulatory element essential for the anaerobic induction	Environmental stress-related element
BvGT16	ARE	AAACCA	985	6	+	Zea mays	cis-acting regulatory element essential for the anaerobic induction	Environmental stress-related element
BvGT16	ARE	AAACCA	1028	6	+	Zea mays	cis-acting regulatory element essential for the anaerobic induction	Environmental stress-related element
BvGT16	ARE	AAACCA	1393	6	+	Zea mays	cis-acting regulatory element essential for the anaerobic induction	Environmental stress-related element
BvGT16	ARE	AAACCA	1643	6	+	Zea mays	cis-acting regulatory element essential for the anaerobic induction	Environmental stress-related element
BvGT16	AC-I	(T/C)C(T/C)(C/T)ACC(T/C)ACC	1099	9	+	Phaseolus vulgaris	MYB binding site element	Site-binding related elements
BvGT16	Myb-binding site	CAACAG	87	6	-	Nicotiana tabacum		Site-binding related elements
BvGT16	Myb-binding site	CAACAG	165	6	-	Nicotiana tabacum		Site-binding related elements
BvGT16	W box	TTGACC	1538	6	+	Arabidopsis thaliana		Environmental stress-related element
BvGT16	CAAT-box	CAAAT	5	5	+	Pisum sativum	common cis-acting element in promoter and enhancer regions	Site-binding related elements
BvGT16	CAAT-box	CAAT	25	4	+	Nicotiana glutinosa	common cis-acting element in promoter and enhancer regions	Site-binding related elements
BvGT16	CAAT-box	CAAT	98	4	+	Nicotiana glutinosa	common cis-acting element in promoter and enhancer regions	Site-binding related elements
BvGT16	CAAT-box	CAAAT	105	5	+	Pisum sativum	common cis-acting element in promoter and enhancer regions	Site-binding related elements
BvGT16	CAAT-box	CAAAT	174	5	+	Pisum sativum	common cis-acting element in promoter and enhancer regions	Site-binding related elements
BvGT16	CAAT-box	CAAT	177	4	-	Nicotiana glutinosa	common cis-acting element in promoter and enhancer regions	Site-binding related elements
BvGT16	CAAT-box	CCAAT	287	5	-	Arabidopsis thaliana	common cis-acting element in promoter and enhancer regions	Site-binding related elements
BvGT16	CAAT-box	CAAT	321	4	+	Nicotiana glutinosa	common cis-acting element in promoter and enhancer regions	Site-binding related elements
BvGT16	CAAT-box	CAAAT	340	5	+	Pisum sativum	common cis-acting element in promoter and enhancer regions	Site-binding related elements
BvGT16	CAAT-box	CCAAT	363	5	-	Arabidopsis thaliana	common cis-acting element in promoter and enhancer regions	Site-binding related elements
BvGT16	CAAT-box	CCAAT	440	5	+	Arabidopsis thaliana	common cis-acting element in promoter and enhancer regions	Site-binding related elements
BvGT16	CAAT-box	CAAT	441	4	+	Nicotiana glutinosa	common cis-acting element in promoter and enhancer regions	Site-binding related elements
BvGT16	CAAT-box	CAAAT	603	5	-	Pisum sativum	common cis-acting element in promoter and enhancer regions	Site-binding related elements
BvGT16	CAAT-box	CAAT	647	4	-	Nicotiana glutinosa	common cis-acting element in promoter and enhancer regions	Site-binding related elements
BvGT16	CAAT-box	CAAT	700	4	+	Nicotiana glutinosa	common cis-acting element in promoter and enhancer regions	Site-binding related elements
BvGT16	CAAT-box	CAAAT	753	5	+	Pisum sativum	common cis-acting element in promoter and enhancer regions	Site-binding related elements
BvGT16	CAAT-box	CAAT	759	4	-	Nicotiana glutinosa	common cis-acting element in promoter and enhancer regions	Site-binding related elements
BvGT16	CAAT-box	CAAAT	805	5	-	Pisum sativum	common cis-acting element in promoter and enhancer regions	Site-binding related elements
BvGT16	CAAT-box	CAAT	841	4	+	Nicotiana glutinosa	common cis-acting element in promoter and enhancer regions	Site-binding related elements
BvGT16	CAAT-box	TGCCAAC	852	7	-	Petunia hybrida	common cis-acting element in promoter and enhancer regions	Site-binding related elements
BvGT16	CAAT-box	CAAT	960	4	-	Nicotiana glutinosa	common cis-acting element in promoter and enhancer regions	Site-binding related elements
BvGT16	CAAT-box	CAAT	1008	4	-	Nicotiana glutinosa	common cis-acting element in promoter and enhancer regions	Site-binding related elements
BvGT16	CAAT-box	CCAAT	1017	5	+	Arabidopsis thaliana	common cis-acting element in promoter and enhancer regions	Site-binding related elements
BvGT16	CAAT-box	CAAT	1018	4	+	Nicotiana glutinosa	common cis-acting element in promoter and enhancer regions	Site-binding related elements
BvGT16	CAAT-box	CAAT	1180	4	-	Nicotiana glutinosa	common cis-acting element in promoter and enhancer regions	Site-binding related elements
BvGT16	CAAT-box	CAAT	1306	4	+	Nicotiana glutinosa	common cis-acting element in promoter and enhancer regions	Site-binding related elements
BvGT16	CAAT-box	CAAT	1318	4	-	Nicotiana glutinosa	common cis-acting element in promoter and enhancer regions	Site-binding related elements
BvGT16	CAAT-box	CAAAT	1324	5	+	Pisum sativum	common cis-acting element in promoter and enhancer regions	Site-binding related elements
BvGT16	CAAT-box	CAAT	1331	4	-	Nicotiana glutinosa	common cis-acting element in promoter and enhancer regions	Site-binding related elements
BvGT16	CAAT-box	CAAT	1405	4	+	Nicotiana glutinosa	common cis-acting element in promoter and enhancer regions	Site-binding related elements
BvGT16	CAAT-box	CAAAT	1413	5	+	Pisum sativum	common cis-acting element in promoter and enhancer regions	Site-binding related elements
BvGT16	CAAT-box	CCAAT	1542	5	+	Arabidopsis thaliana	common cis-acting element in promoter and enhancer regions	Site-binding related elements
BvGT16	CAAT-box	CAAT	1543	4	+	Nicotiana glutinosa	common cis-acting element in promoter and enhancer regions	Site-binding related elements
BvGT16	CAAT-box	CAAT	1549	4	+	Nicotiana glutinosa	common cis-acting element in promoter and enhancer regions	Site-binding related elements
BvGT16	CAAT-box	CAAAT	1594	5	+	Pisum sativum	common cis-acting element in promoter and enhancer regions	Site-binding related elements
BvGT16	CAAT-box	CAAT	1652	4	+	Nicotiana glutinosa	common cis-acting element in promoter and enhancer regions	Site-binding related elements
BvGT16	CAAT-box	CAAT	1889	4	+	Nicotiana glutinosa	common cis-acting element in promoter and enhancer regions	Site-binding related elements
BvGT16	CAAT-box	CAAT	1932	4	+	Nicotiana glutinosa	common cis-acting element in promoter and enhancer regions	Site-binding related elements
BvGT16	TCA	TCATCTTCAT	1695	10	+	Pisum sativum	Reverse transcription Transposable related elements	Site-binding related elements
BvGT16	Unnamed__6	taTAAATATct	1293	10	+	Zea mays		Other elements
BvGT16	Myb	CAACTG	194	6	+	Arabidopsis thaliana		Other elements
BvGT16	WUN-motif	CCATTTCAA	1646	9	+	Nicotiana glutinosa	wound-responsive element	wound-responsive element
BvGT16	TCT-motif	TCTTAC	34	6	-	Arabidopsis thaliana	part of a light responsive element	Light responsive elements
BvGT16	TCT-motif	TCTTAC	182	6	-	Arabidopsis thaliana	part of a light responsive element	Light responsive elements
BvGT16	TCT-motif	TCTTAC	1123	6	+	Arabidopsis thaliana	part of a light responsive element	Light responsive elements
BvGT16	TCT-motif	TCTTAC	1720	6	+	Arabidopsis thaliana	part of a light responsive element	Light responsive elements
BvGT16	I-box	AAGATAAGGCT	505	10	-	Gossypium hirsutum	part of a light responsive element	Light responsive elements
BvGT17	TCA-element	CCATCTTTTT	971	10	-	Nicotiana tabacum	cis-acting element involved in salicylic acid responsiveness	Hormone responsive elements
BvGT17	TCA-element	CCATCTTTTT	1130	9	-	Nicotiana tabacum	cis-acting element involved in salicylic acid responsiveness	Hormone responsive elements
BvGT17	MYB	TAACCA	1232	6	-	Arabidopsis thaliana		Other elements
BvGT17	MYB	CAACAG	1822	6	+	Arabidopsis thaliana		Other elements
BvGT17	MYB	TAACCA	1981	6	-	Arabidopsis thaliana		Other elements
BvGT17	MYB-like sequence	TAACCA	1232	6	-	Arabidopsis thaliana		Other elements
BvGT17	MYB-like sequence	TAACCA	1981	6	-	Arabidopsis thaliana		Other elements
BvGT17	Unnamed__4	CTCC	2	4	+	Petroselinum hortense		Other elements
BvGT17	Unnamed__4	CTCC	390	4	+	Petroselinum hortense		Other elements
BvGT17	Unnamed__4	CTCC	456	4	+	Petroselinum hortense		Other elements
BvGT17	Unnamed__4	CTCC	748	4	-	Petroselinum hortense		Other elements
BvGT17	Unnamed__4	CTCC	979	4	-	Petroselinum hortense		Other elements
BvGT17	Unnamed__4	CTCC	993	4	-	Petroselinum hortense		Other elements
BvGT17	Unnamed__4	CTCC	1004	4	+	Petroselinum hortense		Other elements
BvGT17	Unnamed__4	CTCC	1392	4	+	Petroselinum hortense		Other elements
BvGT17	Unnamed__4	CTCC	1410	4	+	Petroselinum hortense		Other elements
BvGT17	Unnamed__4	CTCC	1494	4	+	Petroselinum hortense		Other elements
BvGT17	Unnamed__4	CTCC	1652	4	+	Petroselinum hortense		Other elements
BvGT17	chs-CMA1a	TTACTTAA	1480	8	+	Daucus carota	part of a light responsive element	Light responsive elements
BvGT17	GT1-motif	GGTTAAT	1397	7	-	Avena sativa	light responsive element	Light responsive elements
BvGT17	GT1-motif	GGTTAA	1398	6	-	Arabidopsis thaliana	light responsive element	Light responsive elements
BvGT17	ARE	AAACCA	548	6	+	Zea mays	cis-acting regulatory element essential for the anaerobic induction	Environmental stress-related element
BvGT17	ARE	AAACCA	633	6	-	Zea mays	cis-acting regulatory element essential for the anaerobic induction	Environmental stress-related element
BvGT17	TATA-box	ATATAA	155	6	+	Brassica oleracea	core promoter element around -30 of transcription start	Promoter related element
BvGT17	TATA-box	TATA	156	4	+	Arabidopsis thaliana	core promoter element around -30 of transcription start	Promoter related element
BvGT17	TATA-box	TAAAGATT	158	8	+	Arabidopsis thaliana	core promoter element around -30 of transcription start	Promoter related element
BvGT17	TATA-box	ATTATA	317	6	+	Brassica napus	core promoter element around -30 of transcription start	Promoter related element
BvGT17	TATA-box	TATAA	318	5	-	Arabidopsis thaliana	core promoter element around -30 of transcription start	Promoter related element
BvGT17	TATA-box	TATA	319	4	+	Arabidopsis thaliana	core promoter element around -30 of transcription start	Promoter related element
BvGT17	TATA-box	ATATAT	347	6	+	Brassica napus	core promoter element around -30 of transcription start	Promoter related element
BvGT17	TATA-box	TATATA	348	6	+	Arabidopsis thaliana	core promoter element around -30 of transcription start	Promoter related element
BvGT17	TATA-box	ATATAT	349	6	+	Brassica napus	core promoter element around -30 of transcription start	Promoter related element
BvGT17	TATA-box	TATATA	350	6	+	Arabidopsis thaliana	core promoter element around -30 of transcription start	Promoter related element
BvGT17	TATA-box	ATATAT	351	6	+	Brassica napus	core promoter element around -30 of transcription start	Promoter related element
BvGT17	TATA-box	TATA	352	4	+	Arabidopsis thaliana	core promoter element around -30 of transcription start	Promoter related element
BvGT17	TATA-box	TATA	417	4	+	Arabidopsis thaliana	core promoter element around -30 of transcription start	Promoter related element
BvGT17	TATA-box	ATTATA	433	6	+	Brassica napus	core promoter element around -30 of transcription start	Promoter related element
BvGT17	TATA-box	TATATAA	434	7	-	Arabidopsis thaliana	core promoter element around -30 of transcription start	Promoter related element
BvGT17	TATA-box	TATATA	435	6	+	Arabidopsis thaliana	core promoter element around -30 of transcription start	Promoter related element
BvGT17	TATA-box	ATATAT	436	6	+	Brassica napus	core promoter element around -30 of transcription start	Promoter related element
BvGT17	TATA-box	TATA	437	4	+	Arabidopsis thaliana	core promoter element around -30 of transcription start	Promoter related element
BvGT17	TATA-box	ATATAA	786	6	+	Brassica oleracea	core promoter element around -30 of transcription start	Promoter related element
BvGT17	TATA-box	TATA	787	4	+	Arabidopsis thaliana	core promoter element around -30 of transcription start	Promoter related element
BvGT17	TATA-box	ATATAT	793	6	+	Brassica napus	core promoter element around -30 of transcription start	Promoter related element
BvGT17	TATA-box	TATATA	794	6	+	Arabidopsis thaliana	core promoter element around -30 of transcription start	Promoter related element
BvGT17	TATA-box	TATA	796	4	+	Arabidopsis thaliana	core promoter element around -30 of transcription start	Promoter related element
BvGT17	TATA-box	ATTATA	867	6	+	Brassica napus	core promoter element around -30 of transcription start	Promoter related element
BvGT17	TATA-box	TATAA	868	5	-	Arabidopsis thaliana	core promoter element around -30 of transcription start	Promoter related element
BvGT17	TATA-box	TATA	869	4	+	Arabidopsis thaliana	core promoter element around -30 of transcription start	Promoter related element
BvGT17	TATA-box	TATA	895	4	+	Arabidopsis thaliana	core promoter element around -30 of transcription start	Promoter related element
BvGT17	TATA-box	TACAAAA	968	7	+	Oryza sativa	core promoter element around -30 of transcription start	Promoter related element
BvGT17	TATA-box	TATAA	1067	5	-	Arabidopsis thaliana	core promoter element around -30 of transcription start	Promoter related element
BvGT17	TATA-box	TATA	1068	4	-	Arabidopsis thaliana	core promoter element around -30 of transcription start	Promoter related element
BvGT17	TATA-box	TATACA	1138	6	-	Helianthus annuus	core promoter element around -30 of transcription start	Promoter related element
BvGT17	TATA-box	TATATA	1140	6	-	Arabidopsis thaliana	core promoter element around -30 of transcription start	Promoter related element
BvGT17	TATA-box	TATA	1142	4	-	Arabidopsis thaliana	core promoter element around -30 of transcription start	Promoter related element
BvGT17	TATA-box	ATTATA	1204	6	+	Brassica napus	core promoter element around -30 of transcription start	Promoter related element
BvGT17	TATA-box	TATAA	1205	5	-	Arabidopsis thaliana	core promoter element around -30 of transcription start	Promoter related element
BvGT17	TATA-box	TATA	1206	4	-	Arabidopsis thaliana	core promoter element around -30 of transcription start	Promoter related element
BvGT17	TATA-box	TATAAATA	1286	8	-	Daucus carota	core promoter element around -30 of transcription start	Promoter related element
BvGT17	TATA-box	TATAAAT	1287	7	-	Brassica juncea	core promoter element around -30 of transcription start	Promoter related element
BvGT17	TATA-box	TATAAA	1288	6	-	Helianthus annuus	core promoter element around -30 of transcription start	Promoter related element
BvGT17	TATA-box	TATAA	1289	5	-	Arabidopsis thaliana	core promoter element around -30 of transcription start	Promoter related element
BvGT17	TATA-box	TATA	1290	4	-	Arabidopsis thaliana	core promoter element around -30 of transcription start	Promoter related element
BvGT17	TATA-box	ATATAT	1383	6	-	Brassica napus	core promoter element around -30 of transcription start	Promoter related element
BvGT17	TATA-box	TATATA	1384	6	-	Arabidopsis thaliana	core promoter element around -30 of transcription start	Promoter related element
BvGT17	TATA-box	ATATAT	1385	6	-	Brassica napus	core promoter element around -30 of transcription start	Promoter related element
BvGT17	TATA-box	TATA	1386	4	-	Arabidopsis thaliana	core promoter element around -30 of transcription start	Promoter related element
BvGT17	TATA-box	ATTATA	1560	6	+	Brassica napus	core promoter element around -30 of transcription start	Promoter related element
BvGT17	TATA-box	TATAA	1561	5	-	Arabidopsis thaliana	core promoter element around -30 of transcription start	Promoter related element
BvGT17	TATA-box	TATA	1562	4	-	Arabidopsis thaliana	core promoter element around -30 of transcription start	Promoter related element
BvGT17	TATA-box	ATTATA	1786	6	+	Brassica napus	core promoter element around -30 of transcription start	Promoter related element
BvGT17	TATA-box	TATAA	1787	5	-	Arabidopsis thaliana	core promoter element around -30 of transcription start	Promoter related element
BvGT17	TATA-box	TATA	1788	4	-	Arabidopsis thaliana	core promoter element around -30 of transcription start	Promoter related element
BvGT17	TATA-box	TATA	1828	4	-	Arabidopsis thaliana	core promoter element around -30 of transcription start	Promoter related element
BvGT17	TATA-box	TATAAAA	1967	7	-	Pisum sativum	core promoter element around -30 of transcription start	Promoter related element
BvGT17	TATA-box	TATAAA	1968	6	-	Helianthus annuus	core promoter element around -30 of transcription start	Promoter related element
BvGT17	TATA-box	TATAA	1969	5	-	Arabidopsis thaliana	core promoter element around -30 of transcription start	Promoter related element
BvGT17	TATA-box	TATA	1970	4	-	Arabidopsis thaliana	core promoter element around -30 of transcription start	Promoter related element
BvGT17	W box	TTGACC	844	6	+	Arabidopsis thaliana		Environmental stress-related element
BvGT17	W box	TTGACC	1501	6	+	Arabidopsis thaliana		Environmental stress-related element
BvGT17	W box	TTGACC	1633	6	+	Arabidopsis thaliana		Environmental stress-related element
BvGT17	TGACG-motif	TGACG	118	5	+	Hordeum vulgare	cis-acting regulatory element involved in the MeJA-responsiveness	Hormone responsive elements
BvGT17	Myb-binding site	CAACAG	1822	6	+	Nicotiana tabacum		Site-binding related elements
BvGT17	CAAT-box	CAAT	56	4	-	Nicotiana glutinosa	common cis-acting element in promoter and enhancer regions	Site-binding related elements
BvGT17	CAAT-box	CAAAT	85	5	-	Pisum sativum	common cis-acting element in promoter and enhancer regions	Site-binding related elements
BvGT17	CAAT-box	CAAT	94	4	+	Nicotiana glutinosa	common cis-acting element in promoter and enhancer regions	Site-binding related elements
BvGT17	CAAT-box	CAAAT	260	5	-	Pisum sativum	common cis-acting element in promoter and enhancer regions	Site-binding related elements
BvGT17	CAAT-box	CAAT	345	4	+	Nicotiana glutinosa	common cis-acting element in promoter and enhancer regions	Site-binding related elements
BvGT17	CAAT-box	CAAAT	362	5	+	Pisum sativum	common cis-acting element in promoter and enhancer regions	Site-binding related elements
BvGT17	CAAT-box	CAAAT	393	5	+	Pisum sativum	common cis-acting element in promoter and enhancer regions	Site-binding related elements
BvGT17	CAAT-box	CAAT	486	4	-	Nicotiana glutinosa	common cis-acting element in promoter and enhancer regions	Site-binding related elements
BvGT17	CAAT-box	CCAAT	510	5	-	Arabidopsis thaliana	common cis-acting element in promoter and enhancer regions	Site-binding related elements
BvGT17	CAAT-box	CAAT	538	4	+	Nicotiana glutinosa	common cis-acting element in promoter and enhancer regions	Site-binding related elements
BvGT17	CAAT-box	CAAT	585	4	-	Nicotiana glutinosa	common cis-acting element in promoter and enhancer regions	Site-binding related elements
BvGT17	CAAT-box	CAAT	596	4	-	Nicotiana glutinosa	common cis-acting element in promoter and enhancer regions	Site-binding related elements
BvGT17	CAAT-box	CAAAT	608	5	-	Pisum sativum	common cis-acting element in promoter and enhancer regions	Site-binding related elements
BvGT17	CAAT-box	CAAT	650	4	-	Nicotiana glutinosa	common cis-acting element in promoter and enhancer regions	Site-binding related elements
BvGT17	CAAT-box	CCAAT	681	5	-	Arabidopsis thaliana	common cis-acting element in promoter and enhancer regions	Site-binding related elements
BvGT17	CAAT-box	CAAAT	722	5	-	Pisum sativum	common cis-acting element in promoter and enhancer regions	Site-binding related elements
BvGT17	CAAT-box	CAAT	826	4	+	Nicotiana glutinosa	common cis-acting element in promoter and enhancer regions	Site-binding related elements
BvGT17	CAAT-box	CAAT	843	4	-	Nicotiana glutinosa	common cis-acting element in promoter and enhancer regions	Site-binding related elements
BvGT17	CAAT-box	CAAAT	851	5	-	Pisum sativum	common cis-acting element in promoter and enhancer regions	Site-binding related elements
BvGT17	CAAT-box	CAAT	874	4	-	Nicotiana glutinosa	common cis-acting element in promoter and enhancer regions	Site-binding related elements
BvGT17	CAAT-box	CCAAT	883	5	-	Arabidopsis thaliana	common cis-acting element in promoter and enhancer regions	Site-binding related elements
BvGT17	CAAT-box	CAAAT	910	5	+	Pisum sativum	common cis-acting element in promoter and enhancer regions	Site-binding related elements
BvGT17	CAAT-box	CAAT	1056	4	+	Nicotiana glutinosa	common cis-acting element in promoter and enhancer regions	Site-binding related elements
BvGT17	CAAT-box	CAAT	1078	4	+	Nicotiana glutinosa	common cis-acting element in promoter and enhancer regions	Site-binding related elements
BvGT17	CAAT-box	CAAT	1106	4	+	Nicotiana glutinosa	common cis-acting element in promoter and enhancer regions	Site-binding related elements
BvGT17	CAAT-box	CAAT	1136	4	-	Nicotiana glutinosa	common cis-acting element in promoter and enhancer regions	Site-binding related elements
BvGT17	CAAT-box	CAAT	1221	4	+	Nicotiana glutinosa	common cis-acting element in promoter and enhancer regions	Site-binding related elements
BvGT17	CAAT-box	CAAT	1241	4	+	Nicotiana glutinosa	common cis-acting element in promoter and enhancer regions	Site-binding related elements
BvGT17	CAAT-box	CAAT	1248	4	-	Nicotiana glutinosa	common cis-acting element in promoter and enhancer regions	Site-binding related elements
BvGT17	CAAT-box	CAAT	1261	4	-	Nicotiana glutinosa	common cis-acting element in promoter and enhancer regions	Site-binding related elements
BvGT17	CAAT-box	CAAAT	1315	5	-	Pisum sativum	common cis-acting element in promoter and enhancer regions	Site-binding related elements
BvGT17	CAAT-box	CAAAT	1327	5	+	Pisum sativum	common cis-acting element in promoter and enhancer regions	Site-binding related elements
BvGT17	CAAT-box	CAAT	1339	4	+	Nicotiana glutinosa	common cis-acting element in promoter and enhancer regions	Site-binding related elements
BvGT17	CAAT-box	CCAAT	1394	5	+	Arabidopsis thaliana	common cis-acting element in promoter and enhancer regions	Site-binding related elements
BvGT17	CAAT-box	CAAT	1395	4	+	Nicotiana glutinosa	common cis-acting element in promoter and enhancer regions	Site-binding related elements
BvGT17	CAAT-box	CAAT	1423	4	+	Nicotiana glutinosa	common cis-acting element in promoter and enhancer regions	Site-binding related elements
BvGT17	CAAT-box	CAAAT	1497	5	+	Pisum sativum	common cis-acting element in promoter and enhancer regions	Site-binding related elements
BvGT17	CAAT-box	CAAT	1500	4	-	Nicotiana glutinosa	common cis-acting element in promoter and enhancer regions	Site-binding related elements
BvGT17	CAAT-box	CCAAT	1505	5	+	Arabidopsis thaliana	common cis-acting element in promoter and enhancer regions	Site-binding related elements
BvGT17	CAAT-box	CAAT	1506	4	+	Nicotiana glutinosa	common cis-acting element in promoter and enhancer regions	Site-binding related elements
BvGT17	CAAT-box	CAAT	1592	4	+	Nicotiana glutinosa	common cis-acting element in promoter and enhancer regions	Site-binding related elements
BvGT17	CAAT-box	CAAT	1609	4	+	Nicotiana glutinosa	common cis-acting element in promoter and enhancer regions	Site-binding related elements
BvGT17	CAAT-box	CAAAT	1622	5	-	Pisum sativum	common cis-acting element in promoter and enhancer regions	Site-binding related elements
BvGT17	CAAT-box	CAAT	1630	4	+	Nicotiana glutinosa	common cis-acting element in promoter and enhancer regions	Site-binding related elements
BvGT17	CAAT-box	CAAT	1632	4	-	Nicotiana glutinosa	common cis-acting element in promoter and enhancer regions	Site-binding related elements
BvGT17	CAAT-box	CAAT	1908	4	+	Nicotiana glutinosa	common cis-acting element in promoter and enhancer regions	Site-binding related elements
BvGT17	CAAT-box	CAAT	1935	4	-	Nicotiana glutinosa	common cis-acting element in promoter and enhancer regions	Site-binding related elements
BvGT17	CAAT-box	CAAT	1946	4	+	Nicotiana glutinosa	common cis-acting element in promoter and enhancer regions	Site-binding related elements
BvGT17	AT~TATA-box	TATATA	348	6	+	Arabidopsis thaliana	Site-binding related elements	Promoter related element
BvGT17	AT~TATA-box	TATATA	350	6	+	Arabidopsis thaliana	Site-binding related elements	Promoter related element
BvGT17	AT~TATA-box	TATATA	435	6	+	Arabidopsis thaliana	Site-binding related elements	Promoter related element
BvGT17	AT~TATA-box	TATATA	794	6	+	Arabidopsis thaliana	Site-binding related elements	Promoter related element
BvGT17	AT~TATA-box	TATATA	1140	6	-	Arabidopsis thaliana	Site-binding related elements	Promoter related element
BvGT17	AT~TATA-box	TATATA	1384	6	-	Arabidopsis thaliana	Site-binding related elements	Promoter related element
BvGT17	TATA	TATAAAAT	1966	8	-	Arabidopsis thaliana		Other elements
BvGT17	WUN-motif	AAATTTCTT	394	9	+	Nicotiana glutinosa	wound-responsive element	wound-responsive element
BvGT17	WUN-motif	CAATTACAT	1106	9	+	Nicotiana glutinosa	wound-responsive element	wound-responsive element
BvGT17	CGTCA-motif	CGTCA	118	5	-	Hordeum vulgare	cis-acting regulatory element involved in the MeJA-responsiveness	Hormone responsive elements
BvGT17	as-1	TGACG	118	5	+	Arabidopsis thaliana		Site-binding related elements
BvGT17		motif_sequence	388	4	+	organism	short_function	Other elements
BvGT17		motif_sequence	489	4	-	organism	short_function	Other elements
BvGT17		motif_sequence	748	4	-	organism	short_function	Other elements
BvGT17		motif_sequence	821	4	+	organism	short_function	Other elements
BvGT17		motif_sequence	1002	4	+	organism	short_function	Other elements
BvGT17		motif_sequence	1071	4	+	organism	short_function	Other elements
BvGT17		motif_sequence	1093	4	-	organism	short_function	Other elements
BvGT17		motif_sequence	1150	4	-	organism	short_function	Other elements
BvGT17		motif_sequence	1183	4	-	organism	short_function	Other elements
BvGT17		motif_sequence	1341	4	+	organism	short_function	Other elements
BvGT17		motif_sequence	1650	4	+	organism	short_function	Other elements
BvGT17		motif_sequence	1876	4	+	organism	short_function	Other elements
BvGT17	TATC-box	TATCCCA	331	7	+	Oryza sativa	cis-acting element involved in gibberellin-responsiveness	Hormone responsive elements
BvGT17	AE-box	AGAAACAA	1921	8	-	Arabidopsis thaliana	part of a module for light response	Light responsive elements
BvGT17	MYC	CATTTG	910	6	-	Arabidopsis thaliana		Other elements
BvGT17	MYC	CAATTG	1630	6	-	Arabidopsis thaliana		Other elements
BvGT17	3-AF3 binding site	CACTATCTAAC	1775	10	+	Pisum sativum	part of a conserved DNA module array (CMA3)	Promoter related element
BvGT17	AAGAA-motif	GAAAGAA	779	7	+	Avena sativa	Relevant elements of Abscisic acid	Hormone responsive elements
BvGT17	AAGAA-motif	GAAAGAA	1443	7	-	Avena sativa	Relevant elements of Abscisic acid	Hormone responsive elements
BvGT17	AAGAA-motif	GAAAGAA	1761	7	-	Avena sativa	Relevant elements of Abscisic acid	Hormone responsive elements
BvGT17	Box 4	ATTAAT	198	6	+	Petroselinum crispum	part of a conserved DNA module involved in light responsiveness	Light responsive elements
BvGT17	Box 4	ATTAAT	1060	6	-	Petroselinum crispum	part of a conserved DNA module involved in light responsiveness	Light responsive elements
BvGT17	Box 4	ATTAAT	1508	6	-	Petroselinum crispum	part of a conserved DNA module involved in light responsiveness	Light responsive elements
BvGT17	Box 4	ATTAAT	1809	6	-	Petroselinum crispum	part of a conserved DNA module involved in light responsiveness	Light responsive elements
BvGT18	GT1-motif	GGTTAAT	179	7	-	Avena sativa	light responsive element	Light responsive elements
BvGT18	GT1-motif	GGTTAA	180	6	-	Arabidopsis thaliana	light responsive element	Light responsive elements
BvGT18	GT1-motif	GGTTAA	205	6	+	Arabidopsis thaliana	light responsive element	Light responsive elements
BvGT18	GT1-motif	GGTTAAT	1974	7	+	Avena sativa	light responsive element	Light responsive elements
BvGT18	MBS	CAACTG	1167	6	-	Arabidopsis thaliana	MYB binding site involved in drought-inducibility	Environmental stress-related element
BvGT18	MBS	CAACTG	1565	6	+	Arabidopsis thaliana	MYB binding site involved in drought-inducibility	Environmental stress-related element
BvGT18	ARE	AAACCA	1122	6	+	Zea mays	cis-acting regulatory element essential for the anaerobic induction	Environmental stress-related element
BvGT18	ARE	AAACCA	1430	6	-	Zea mays	cis-acting regulatory element essential for the anaerobic induction	Environmental stress-related element
BvGT18	ARE	AAACCA	1558	6	+	Zea mays	cis-acting regulatory element essential for the anaerobic induction	Environmental stress-related element
BvGT18	STRE	AGGGG	251	5	-	Arabidopsis thaliana	Stress response element	Environmental stress-related element
BvGT18	STRE	AGGGG	256	5	-	Arabidopsis thaliana	Stress response element	Environmental stress-related element
BvGT18	STRE	AGGGG	1266	5	+	Arabidopsis thaliana	Stress response element	Environmental stress-related element
BvGT18	STRE	AGGGG	1746	5	+	Arabidopsis thaliana	Stress response element	Environmental stress-related element
BvGT18	TATA-box	ATTATA	133	6	+	Brassica napus	core promoter element around -30 of transcription start	Promoter related element
BvGT18	TATA-box	TATAA	134	5	-	Arabidopsis thaliana	core promoter element around -30 of transcription start	Promoter related element
BvGT18	TATA-box	TATA	135	4	+	Arabidopsis thaliana	core promoter element around -30 of transcription start	Promoter related element
BvGT18	TATA-box	ATTATA	144	6	+	Brassica napus	core promoter element around -30 of transcription start	Promoter related element
BvGT18	TATA-box	TATAA	145	5	-	Arabidopsis thaliana	core promoter element around -30 of transcription start	Promoter related element
BvGT18	TATA-box	TATA	146	4	+	Arabidopsis thaliana	core promoter element around -30 of transcription start	Promoter related element
BvGT18	TATA-box	ATATAA	531	6	+	Brassica oleracea	core promoter element around -30 of transcription start	Promoter related element
BvGT18	TATA-box	TATA	532	4	+	Arabidopsis thaliana	core promoter element around -30 of transcription start	Promoter related element
BvGT18	TATA-box	TATA	540	4	+	Arabidopsis thaliana	core promoter element around -30 of transcription start	Promoter related element
BvGT18	TATA-box	TATA	628	4	+	Arabidopsis thaliana	core promoter element around -30 of transcription start	Promoter related element
BvGT18	TATA-box	TACAAAA	689	7	-	Oryza sativa	core promoter element around -30 of transcription start	Promoter related element
BvGT18	TATA-box	ATATAT	710	6	+	Brassica napus	core promoter element around -30 of transcription start	Promoter related element
BvGT18	TATA-box	TATATA	711	6	+	Arabidopsis thaliana	core promoter element around -30 of transcription start	Promoter related element
BvGT18	TATA-box	ATATAT	712	6	+	Brassica napus	core promoter element around -30 of transcription start	Promoter related element
BvGT18	TATA-box	TATA	713	4	+	Arabidopsis thaliana	core promoter element around -30 of transcription start	Promoter related element
BvGT18	TATA-box	TATA	827	4	+	Arabidopsis thaliana	core promoter element around -30 of transcription start	Promoter related element
BvGT18	TATA-box	ATATAT	870	6	+	Brassica napus	core promoter element around -30 of transcription start	Promoter related element
BvGT18	TATA-box	TATATA	871	6	+	Arabidopsis thaliana	core promoter element around -30 of transcription start	Promoter related element
BvGT18	TATA-box	ATATAA	872	6	+	Brassica oleracea	core promoter element around -30 of transcription start	Promoter related element
BvGT18	TATA-box	TATA	873	4	+	Arabidopsis thaliana	core promoter element around -30 of transcription start	Promoter related element
BvGT18	TATA-box	ccTATAAAaa	1014	9	+	Arabidopsis thaliana	core promoter element around -30 of transcription start	Promoter related element
BvGT18	TATA-box	ATATAT	1024	6	-	Brassica napus	core promoter element around -30 of transcription start	Promoter related element
BvGT18	TATA-box	TATATA	1025	6	-	Arabidopsis thaliana	core promoter element around -30 of transcription start	Promoter related element
BvGT18	TATA-box	TATA	1027	4	-	Arabidopsis thaliana	core promoter element around -30 of transcription start	Promoter related element
BvGT18	TATA-box	TATAA	1071	5	-	Arabidopsis thaliana	core promoter element around -30 of transcription start	Promoter related element
BvGT18	TATA-box	TATA	1072	4	-	Arabidopsis thaliana	core promoter element around -30 of transcription start	Promoter related element
BvGT18	TATA-box	TATAAAA	1194	7	-	Pisum sativum	core promoter element around -30 of transcription start	Promoter related element
BvGT18	TATA-box	TATAAA	1195	6	-	Helianthus annuus	core promoter element around -30 of transcription start	Promoter related element
BvGT18	TATA-box	TATAA	1196	5	-	Arabidopsis thaliana	core promoter element around -30 of transcription start	Promoter related element
BvGT18	TATA-box	TATA	1197	4	-	Arabidopsis thaliana	core promoter element around -30 of transcription start	Promoter related element
BvGT18	TATA-box	TATA	1445	4	-	Arabidopsis thaliana	core promoter element around -30 of transcription start	Promoter related element
BvGT18	TATA-box	TATA	1591	4	-	Arabidopsis thaliana	core promoter element around -30 of transcription start	Promoter related element
BvGT18	TATA-box	TATAAATA	1645	8	-	Daucus carota	core promoter element around -30 of transcription start	Promoter related element
BvGT18	TATA-box	TATAAAT	1646	7	-	Brassica juncea	core promoter element around -30 of transcription start	Promoter related element
BvGT18	TATA-box	TATAAA	1647	6	-	Helianthus annuus	core promoter element around -30 of transcription start	Promoter related element
BvGT18	TATA-box	TATAA	1648	5	-	Arabidopsis thaliana	core promoter element around -30 of transcription start	Promoter related element
BvGT18	TATA-box	TATA	1649	4	-	Arabidopsis thaliana	core promoter element around -30 of transcription start	Promoter related element
BvGT18	TATA-box	TATAA	1809	5	-	Arabidopsis thaliana	core promoter element around -30 of transcription start	Promoter related element
BvGT18	TATA-box	TATA	1810	4	-	Arabidopsis thaliana	core promoter element around -30 of transcription start	Promoter related element
BvGT18	TATA-box	TACAAAA	1859	7	-	Oryza sativa	core promoter element around -30 of transcription start	Promoter related element
BvGT18	TATA-box	TATACA	1862	6	-	Helianthus annuus	core promoter element around -30 of transcription start	Promoter related element
BvGT18	TATA-box	TATA	1864	4	-	Arabidopsis thaliana	core promoter element around -30 of transcription start	Promoter related element
BvGT18	AC-I	(T/C)C(T/C)(C/T)ACC(T/C)ACC	453	8.5	-	Phaseolus vulgaris	MYB binding site element	Site-binding related elements
BvGT18	MYB	TAACCA	181	6	+	Arabidopsis thaliana		Other elements
BvGT18	MYB	TAACCA	204	6	-	Arabidopsis thaliana		Other elements
BvGT18	MYB	CAACAG	1368	6	+	Arabidopsis thaliana		Other elements
BvGT18	MYB	CAACAG	1426	6	-	Arabidopsis thaliana		Other elements
BvGT18	MYB	CAACCA	1704	6	+	Arabidopsis thaliana		Other elements
BvGT18	MYB	TAACCA	1973	6	-	Arabidopsis thaliana		Other elements
BvGT18	MYB-like sequence	TAACCA	181	6	+	Arabidopsis thaliana		Other elements
BvGT18	MYB-like sequence	TAACCA	204	6	-	Arabidopsis thaliana		Other elements
BvGT18	MYB-like sequence	TAACCA	1973	6	-	Arabidopsis thaliana		Other elements
BvGT18	chs-CMA1a	TTACTTAA	97	8	+	Daucus carota	part of a light responsive element	Light responsive elements
BvGT18	Unnamed__4	CTCC	90	4	+	Petroselinum hortense		Other elements
BvGT18	Unnamed__4	CTCC	118	4	+	Petroselinum hortense		Other elements
BvGT18	Unnamed__4	CTCC	157	4	+	Petroselinum hortense		Other elements
BvGT18	Unnamed__4	CTCC	168	4	+	Petroselinum hortense		Other elements
BvGT18	Unnamed__4	CTCC	171	4	+	Petroselinum hortense		Other elements
BvGT18	Unnamed__4	CTCC	254	4	+	Petroselinum hortense		Other elements
BvGT18	Unnamed__4	CTCC	312	4	+	Petroselinum hortense		Other elements
BvGT18	Unnamed__4	CTCC	315	4	+	Petroselinum hortense		Other elements
BvGT18	Unnamed__4	CTCC	461	4	-	Petroselinum hortense		Other elements
BvGT18	Unnamed__4	CTCC	499	4	-	Petroselinum hortense		Other elements
BvGT18	Unnamed__4	CTCC	610	4	+	Petroselinum hortense		Other elements
BvGT18	Unnamed__4	CTCC	776	4	+	Petroselinum hortense		Other elements
BvGT18	Unnamed__4	CTCC	1035	4	+	Petroselinum hortense		Other elements
BvGT18	Unnamed__4	CTCC	1152	4	+	Petroselinum hortense		Other elements
BvGT18	Unnamed__4	CTCC	1324	4	+	Petroselinum hortense		Other elements
BvGT18	Unnamed__4	CTCC	1685	4	+	Petroselinum hortense		Other elements
BvGT18	Unnamed__4	CTCC	1931	4	-	Petroselinum hortense		Other elements
BvGT18	Myb	CAACTG	1167	6	-	Arabidopsis thaliana		Other elements
BvGT18	Myb	CAACTG	1565	6	+	Arabidopsis thaliana		Other elements
BvGT18	Myb	TAACTG	1988	6	-	Arabidopsis thaliana		Other elements
BvGT18	AT~TATA-box	TATATA	711	6	+	Arabidopsis thaliana	Site-binding related elements	Promoter related element
BvGT18	AT~TATA-box	TATATA	871	6	+	Arabidopsis thaliana	Site-binding related elements	Promoter related element
BvGT18	AT~TATA-box	TATATA	1025	6	-	Arabidopsis thaliana	Site-binding related elements	Promoter related element
BvGT18	WUN-motif	AAATTACT	94	8	+	Nicotiana glutinosa	wound-responsive element	wound-responsive element
BvGT18	TCT-motif	TCTTAC	38	6	-	Arabidopsis thaliana	part of a light responsive element	Light responsive elements
BvGT18	TGACG-motif	TGACG	661	5	-	Hordeum vulgare	cis-acting regulatory element involved in the MeJA-responsiveness	Hormone responsive elements
BvGT18	TGACG-motif	TGACG	1882	5	-	Hordeum vulgare	cis-acting regulatory element involved in the MeJA-responsiveness	Hormone responsive elements
BvGT18	ABRE	ACGTG	424	5	+	Arabidopsis thaliana	cis-acting element involved in the abscisic acid responsiveness	Hormone responsive elements
BvGT18	ABRE	ACGTG	436	5	-	Arabidopsis thaliana	cis-acting element involved in the abscisic acid responsiveness	Hormone responsive elements
BvGT18	ABRE	ACGTG	638	5	-	Arabidopsis thaliana	cis-acting element involved in the abscisic acid responsiveness	Hormone responsive elements
BvGT18	ABRE	ACGTG	1950	5	+	Arabidopsis thaliana	cis-acting element involved in the abscisic acid responsiveness	Hormone responsive elements
BvGT18	Myb-binding site	CAACAG	1368	6	+	Nicotiana tabacum		Site-binding related elements
BvGT18	Myb-binding site	CAACAG	1426	6	-	Nicotiana tabacum		Site-binding related elements
BvGT18	CAAT-box	CCAAT	7	5	-	Arabidopsis thaliana	common cis-acting element in promoter and enhancer regions	Site-binding related elements
BvGT18	CAAT-box	CAAAT	12	5	-	Pisum sativum	common cis-acting element in promoter and enhancer regions	Site-binding related elements
BvGT18	CAAT-box	CAAAT	17	5	+	Pisum sativum	common cis-acting element in promoter and enhancer regions	Site-binding related elements
BvGT18	CAAT-box	CAAT	75	4	-	Nicotiana glutinosa	common cis-acting element in promoter and enhancer regions	Site-binding related elements
BvGT18	CAAT-box	CAAAT	93	5	+	Pisum sativum	common cis-acting element in promoter and enhancer regions	Site-binding related elements
BvGT18	CAAT-box	CCAAT	112	5	+	Arabidopsis thaliana	common cis-acting element in promoter and enhancer regions	Site-binding related elements
BvGT18	CAAT-box	CAAT	113	4	+	Nicotiana glutinosa	common cis-acting element in promoter and enhancer regions	Site-binding related elements
BvGT18	CAAT-box	CAAT	212	4	-	Nicotiana glutinosa	common cis-acting element in promoter and enhancer regions	Site-binding related elements
BvGT18	CAAT-box	CAAT	275	4	-	Nicotiana glutinosa	common cis-acting element in promoter and enhancer regions	Site-binding related elements
BvGT18	CAAT-box	CAAT	441	4	-	Nicotiana glutinosa	common cis-acting element in promoter and enhancer regions	Site-binding related elements
BvGT18	CAAT-box	CCAAT	471	5	-	Arabidopsis thaliana	common cis-acting element in promoter and enhancer regions	Site-binding related elements
BvGT18	CAAT-box	CCAAT	525	5	+	Arabidopsis thaliana	common cis-acting element in promoter and enhancer regions	Site-binding related elements
BvGT18	CAAT-box	CAAT	526	4	+	Nicotiana glutinosa	common cis-acting element in promoter and enhancer regions	Site-binding related elements
BvGT18	CAAT-box	CAAT	589	4	-	Nicotiana glutinosa	common cis-acting element in promoter and enhancer regions	Site-binding related elements
BvGT18	CAAT-box	CAAT	622	4	+	Nicotiana glutinosa	common cis-acting element in promoter and enhancer regions	Site-binding related elements
BvGT18	CAAT-box	CAAT	652	4	-	Nicotiana glutinosa	common cis-acting element in promoter and enhancer regions	Site-binding related elements
BvGT18	CAAT-box	CAAT	698	4	-	Nicotiana glutinosa	common cis-acting element in promoter and enhancer regions	Site-binding related elements
BvGT18	CAAT-box	CAAT	708	4	+	Nicotiana glutinosa	common cis-acting element in promoter and enhancer regions	Site-binding related elements
BvGT18	CAAT-box	CAAAT	767	5	+	Pisum sativum	common cis-acting element in promoter and enhancer regions	Site-binding related elements
BvGT18	CAAT-box	CAAT	834	4	+	Nicotiana glutinosa	common cis-acting element in promoter and enhancer regions	Site-binding related elements
BvGT18	CAAT-box	CAAAT	844	5	+	Pisum sativum	common cis-acting element in promoter and enhancer regions	Site-binding related elements
BvGT18	CAAT-box	CAAAT	867	5	+	Pisum sativum	common cis-acting element in promoter and enhancer regions	Site-binding related elements
BvGT18	CAAT-box	CAAT	902	4	+	Nicotiana glutinosa	common cis-acting element in promoter and enhancer regions	Site-binding related elements
BvGT18	CAAT-box	CAAT	912	4	+	Nicotiana glutinosa	common cis-acting element in promoter and enhancer regions	Site-binding related elements
BvGT18	CAAT-box	CAAT	997	4	+	Nicotiana glutinosa	common cis-acting element in promoter and enhancer regions	Site-binding related elements
BvGT18	CAAT-box	CAAT	999	4	-	Nicotiana glutinosa	common cis-acting element in promoter and enhancer regions	Site-binding related elements
BvGT18	CAAT-box	CCAAT	1014	5	+	Arabidopsis thaliana	common cis-acting element in promoter and enhancer regions	Site-binding related elements
BvGT18	CAAT-box	CAAT	1015	4	+	Nicotiana glutinosa	common cis-acting element in promoter and enhancer regions	Site-binding related elements
BvGT18	CAAT-box	CAAT	1130	4	+	Nicotiana glutinosa	common cis-acting element in promoter and enhancer regions	Site-binding related elements
BvGT18	CAAT-box	CAAT	1315	4	+	Nicotiana glutinosa	common cis-acting element in promoter and enhancer regions	Site-binding related elements
BvGT18	CAAT-box	CAAAT	1338	5	-	Pisum sativum	common cis-acting element in promoter and enhancer regions	Site-binding related elements
BvGT18	CAAT-box	CAAT	1501	4	+	Nicotiana glutinosa	common cis-acting element in promoter and enhancer regions	Site-binding related elements
BvGT18	CAAT-box	CAAAT	1529	5	+	Pisum sativum	common cis-acting element in promoter and enhancer regions	Site-binding related elements
BvGT18	CAAT-box	CCCAATTT	1776	8	-	Arabidopsis thaliana	common cis-acting element in promoter and enhancer regions	Site-binding related elements
BvGT18	CAAT-box	CCAAT	1778	5	-	Arabidopsis thaliana	common cis-acting element in promoter and enhancer regions	Site-binding related elements
BvGT18	CAAT-box	CAAT	1795	4	-	Nicotiana glutinosa	common cis-acting element in promoter and enhancer regions	Site-binding related elements
BvGT18	CAAT-box	CAAAT	1822	5	-	Pisum sativum	common cis-acting element in promoter and enhancer regions	Site-binding related elements
BvGT18	CAAT-box	CAAAT	1834	5	-	Pisum sativum	common cis-acting element in promoter and enhancer regions	Site-binding related elements
BvGT18	CAAT-box	CAAT	1877	4	-	Nicotiana glutinosa	common cis-acting element in promoter and enhancer regions	Site-binding related elements
BvGT18	CAAT-box	CAAT	1885	4	+	Nicotiana glutinosa	common cis-acting element in promoter and enhancer regions	Site-binding related elements
BvGT18	CAAT-box	CAAT	1993	4	-	Nicotiana glutinosa	common cis-acting element in promoter and enhancer regions	Site-binding related elements
BvGT18	ABRE3a	TACGTG	436	6	-	Zea mays	Relevant elements of Abscisic acid	Hormone responsive elements
BvGT18	ABRE3a	TACGTG	1949	6	+	Zea mays	Relevant elements of Abscisic acid	Hormone responsive elements
BvGT18	Sp1	GGGCGG	107	6	-	Oryza sativa	light responsive element	Light responsive elements
BvGT18	MYC	CATTTG	767	6	-	Arabidopsis thaliana		Other elements
BvGT18	MYC	CATTTG	844	6	-	Arabidopsis thaliana		Other elements
BvGT18	MYC	CAATTG	997	6	+	Arabidopsis thaliana		Other elements
BvGT18	CGTCA-motif	CGTCA	661	5	+	Hordeum vulgare	cis-acting regulatory element involved in the MeJA-responsiveness	Hormone responsive elements
BvGT18	CGTCA-motif	CGTCA	1882	5	+	Hordeum vulgare	cis-acting regulatory element involved in the MeJA-responsiveness	Hormone responsive elements
BvGT18	GARE-motif	TCTGTTG	1368	7	-	Brassica oleracea	gibberellin-responsive element	Hormone responsive elements
BvGT18	as-1	TGACG	661	5	-	Arabidopsis thaliana		Site-binding related elements
BvGT18	as-1	TGACG	1882	5	-	Arabidopsis thaliana		Site-binding related elements
BvGT18	ABRE4	CACGTA	436	6	+	Zea mays	Relevant elements of Abscisic acid	Hormone responsive elements
BvGT18	ABRE4	CACGTA	1949	6	-	Zea mays	Relevant elements of Abscisic acid	Hormone responsive elements
BvGT18	G-box	TACGTG	436	6	-	Arabidopsis thaliana	cis-acting regulatory element involved in light responsiveness	Light responsive elements
BvGT18	G-box	CACGTC	638	6	+	Zea mays	cis-acting regulatory element involved in light responsiveness	Light responsive elements
BvGT18	G-box	TACGTG	1949	6	+	Arabidopsis thaliana	cis-acting regulatory element involved in light responsiveness	Light responsive elements
BvGT18		motif_sequence	216	4	+	organism	short_function	Other elements
BvGT18		motif_sequence	339	4	+	organism	short_function	Other elements
BvGT18		motif_sequence	499	4	-	organism	short_function	Other elements
BvGT18		motif_sequence	617	4	+	organism	short_function	Other elements
BvGT18		motif_sequence	1322	4	+	organism	short_function	Other elements
BvGT18		motif_sequence	1410	4	-	organism	short_function	Other elements
BvGT18		motif_sequence	1683	4	+	organism	short_function	Other elements
BvGT18	G-Box	CACGTT	423	6	-	Pisum sativum	cis-acting regulatory element involved in light responsiveness	Light responsive elements
BvGT18	Box 4	ATTAAT	1542	6	-	Petroselinum crispum	part of a conserved DNA module involved in light responsiveness	Light responsive elements
BvGT18	AAGAA-motif	GAAAGAA	1481	7	+	Avena sativa	Relevant elements of Abscisic acid	Hormone responsive elements
BvGT18	AAGAA-motif	GAAAGAA	1922	7	+	Avena sativa	Relevant elements of Abscisic acid	Hormone responsive elements
BvGT19	TCT-motif	TCTTAC	1917	6	+	Arabidopsis thaliana	part of a light responsive element	Light responsive elements
BvGT19	Myb	TAACTG	160	6	+	Arabidopsis thaliana		Other elements
BvGT19	Myb	TAACTG	1115	6	-	Arabidopsis thaliana		Other elements
BvGT19	AT~TATA-box	TATATA	252	6	+	Arabidopsis thaliana	Site-binding related elements	Promoter related element
BvGT19	AT~TATA-box	TATATA	1284	6	-	Arabidopsis thaliana	Site-binding related elements	Promoter related element
BvGT19	AT~TATA-box	TATATA	1286	6	-	Arabidopsis thaliana	Site-binding related elements	Promoter related element
BvGT19	F-box	CTATTCTCATT	1364	10	-	Lycopersicon esculentum	Elements related to flower development	development related elements
BvGT19	CAAT-box	CAAT	8	4	+	Nicotiana glutinosa	common cis-acting element in promoter and enhancer regions	Site-binding related elements
BvGT19	CAAT-box	CAAAT	56	5	+	Pisum sativum	common cis-acting element in promoter and enhancer regions	Site-binding related elements
BvGT19	CAAT-box	CAAAT	69	5	+	Pisum sativum	common cis-acting element in promoter and enhancer regions	Site-binding related elements
BvGT19	CAAT-box	CAAAT	77	5	+	Pisum sativum	common cis-acting element in promoter and enhancer regions	Site-binding related elements
BvGT19	CAAT-box	CAAT	85	4	+	Nicotiana glutinosa	common cis-acting element in promoter and enhancer regions	Site-binding related elements
BvGT19	CAAT-box	CAAT	107	4	+	Nicotiana glutinosa	common cis-acting element in promoter and enhancer regions	Site-binding related elements
BvGT19	CAAT-box	CAAAT	146	5	+	Pisum sativum	common cis-acting element in promoter and enhancer regions	Site-binding related elements
BvGT19	CAAT-box	CAAT	204	4	+	Nicotiana glutinosa	common cis-acting element in promoter and enhancer regions	Site-binding related elements
BvGT19	CAAT-box	CAAAT	545	5	+	Pisum sativum	common cis-acting element in promoter and enhancer regions	Site-binding related elements
BvGT19	CAAT-box	CAAAT	556	5	+	Pisum sativum	common cis-acting element in promoter and enhancer regions	Site-binding related elements
BvGT19	CAAT-box	CAAT	1141	4	+	Nicotiana glutinosa	common cis-acting element in promoter and enhancer regions	Site-binding related elements
BvGT19	CAAT-box	CAAT	1182	4	-	Nicotiana glutinosa	common cis-acting element in promoter and enhancer regions	Site-binding related elements
BvGT19	CAAT-box	CAAAT	1208	5	-	Pisum sativum	common cis-acting element in promoter and enhancer regions	Site-binding related elements
BvGT19	CAAT-box	CAAAT	1221	5	-	Pisum sativum	common cis-acting element in promoter and enhancer regions	Site-binding related elements
BvGT19	CAAT-box	CAAAT	1266	5	-	Pisum sativum	common cis-acting element in promoter and enhancer regions	Site-binding related elements
BvGT19	CAAT-box	CAAAT	1280	5	+	Pisum sativum	common cis-acting element in promoter and enhancer regions	Site-binding related elements
BvGT19	CAAT-box	CAAT	1317	4	+	Nicotiana glutinosa	common cis-acting element in promoter and enhancer regions	Site-binding related elements
BvGT19	CAAT-box	CAAT	1339	4	-	Nicotiana glutinosa	common cis-acting element in promoter and enhancer regions	Site-binding related elements
BvGT19	CAAT-box	CAAT	1379	4	+	Nicotiana glutinosa	common cis-acting element in promoter and enhancer regions	Site-binding related elements
BvGT19	CAAT-box	CAAT	1381	4	-	Nicotiana glutinosa	common cis-acting element in promoter and enhancer regions	Site-binding related elements
BvGT19	CAAT-box	CCAAT	1416	5	+	Arabidopsis thaliana	common cis-acting element in promoter and enhancer regions	Site-binding related elements
BvGT19	CAAT-box	CAAT	1417	4	+	Nicotiana glutinosa	common cis-acting element in promoter and enhancer regions	Site-binding related elements
BvGT19	CAAT-box	CAAAT	1428	5	+	Pisum sativum	common cis-acting element in promoter and enhancer regions	Site-binding related elements
BvGT19	CAAT-box	CAAT	1433	4	+	Nicotiana glutinosa	common cis-acting element in promoter and enhancer regions	Site-binding related elements
BvGT19	CAAT-box	CAAT	1601	4	-	Nicotiana glutinosa	common cis-acting element in promoter and enhancer regions	Site-binding related elements
BvGT19	CAAT-box	CAAT	1697	4	-	Nicotiana glutinosa	common cis-acting element in promoter and enhancer regions	Site-binding related elements
BvGT19	CAAT-box	CCAAT	1839	5	+	Arabidopsis thaliana	common cis-acting element in promoter and enhancer regions	Site-binding related elements
BvGT19	CAAT-box	CAAT	1840	4	+	Nicotiana glutinosa	common cis-acting element in promoter and enhancer regions	Site-binding related elements
BvGT19	CAAT-box	CAAAT	1855	5	+	Pisum sativum	common cis-acting element in promoter and enhancer regions	Site-binding related elements
BvGT19	CAAT-box	AGCTCAATTTCA	1883	11	+	Daucus carota	common cis-acting element in promoter and enhancer regions	Site-binding related elements
BvGT19	CAAT-box	CAAT	1887	4	+	Nicotiana glutinosa	common cis-acting element in promoter and enhancer regions	Site-binding related elements
BvGT19	CAAT-box	CAAAT	1898	5	+	Pisum sativum	common cis-acting element in promoter and enhancer regions	Site-binding related elements
BvGT19	CAAT-box	CCAAT	1946	5	+	Arabidopsis thaliana	common cis-acting element in promoter and enhancer regions	Site-binding related elements
BvGT19	CAAT-box	CAAT	1947	4	+	Nicotiana glutinosa	common cis-acting element in promoter and enhancer regions	Site-binding related elements
BvGT19	CAAT-box	CAAAT	1961	5	+	Pisum sativum	common cis-acting element in promoter and enhancer regions	Site-binding related elements
BvGT19	TCA	TCATCTTCAT	1349	9	+	Pisum sativum	Reverse transcription Transposable related elements	Site-binding related elements
BvGT19	TGA-element	AACGAC	698	6	-	Brassica oleracea	auxin-responsive element	Hormone responsive elements
BvGT19	TGA-element	AACGAC	879	6	-	Brassica oleracea	auxin-responsive element	Hormone responsive elements
BvGT19	TGA-element	AACGAC	1110	6	+	Brassica oleracea	auxin-responsive element	Hormone responsive elements
BvGT19	Unnamed__16	GCTGCCCGTC	585	9	+	Zea mays		Other elements
BvGT19	Unnamed__6	taTAAATATct	1284	10	+	Zea mays		Other elements
BvGT19	MBSI	aaaAaaC(G/C)GTTA	1229	10.5	+	Petunia hybrida	MYB binding site involved in flavonoid biosynthetic genes regulation	Site-binding related elements
BvGT19	ACE	GACACGTATG	1490	9	-	Petroselinum crispum	cis-acting element involved in light responsiveness	Light responsive elements
BvGT19	Myc	TCTCTTA	1915	7	+	Arabidopsis thaliana		Other elements
BvGT19	STRE	AGGGG	121	5	-	Arabidopsis thaliana	Stress response element	Environmental stress-related element
BvGT19	STRE	AGGGG	312	5	-	Arabidopsis thaliana	Stress response element	Environmental stress-related element
BvGT19	STRE	AGGGG	324	5	-	Arabidopsis thaliana	Stress response element	Environmental stress-related element
BvGT19	STRE	AGGGG	330	5	-	Arabidopsis thaliana	Stress response element	Environmental stress-related element
BvGT19	STRE	AGGGG	336	5	-	Arabidopsis thaliana	Stress response element	Environmental stress-related element
BvGT19	STRE	AGGGG	769	5	+	Arabidopsis thaliana	Stress response element	Environmental stress-related element
BvGT19	STRE	AGGGG	787	5	+	Arabidopsis thaliana	Stress response element	Environmental stress-related element
BvGT19	STRE	AGGGG	792	5	+	Arabidopsis thaliana	Stress response element	Environmental stress-related element
BvGT19	STRE	AGGGG	826	5	+	Arabidopsis thaliana	Stress response element	Environmental stress-related element
BvGT19	STRE	AGGGG	851	5	+	Arabidopsis thaliana	Stress response element	Environmental stress-related element
BvGT19	STRE	AGGGG	929	5	+	Arabidopsis thaliana	Stress response element	Environmental stress-related element
BvGT19	STRE	AGGGG	935	5	+	Arabidopsis thaliana	Stress response element	Environmental stress-related element
BvGT19	STRE	AGGGG	966	5	+	Arabidopsis thaliana	Stress response element	Environmental stress-related element
BvGT19	STRE	AGGGG	971	5	+	Arabidopsis thaliana	Stress response element	Environmental stress-related element
BvGT19	STRE	AGGGG	989	5	+	Arabidopsis thaliana	Stress response element	Environmental stress-related element
BvGT19	STRE	AGGGG	1007	5	+	Arabidopsis thaliana	Stress response element	Environmental stress-related element
BvGT19	STRE	AGGGG	1020	5	+	Arabidopsis thaliana	Stress response element	Environmental stress-related element
BvGT19	STRE	AGGGG	1691	5	-	Arabidopsis thaliana	Stress response element	Environmental stress-related element
BvGT19	TATA-box	ATATAA	26	6	+	Brassica oleracea	core promoter element around -30 of transcription start	Promoter related element
BvGT19	TATA-box	TATA	27	4	+	Arabidopsis thaliana	core promoter element around -30 of transcription start	Promoter related element
BvGT19	TATA-box	ATTATA	34	6	+	Brassica napus	core promoter element around -30 of transcription start	Promoter related element
BvGT19	TATA-box	TATAA	35	5	-	Arabidopsis thaliana	core promoter element around -30 of transcription start	Promoter related element
BvGT19	TATA-box	TATA	36	4	+	Arabidopsis thaliana	core promoter element around -30 of transcription start	Promoter related element
BvGT19	TATA-box	TATA	88	4	+	Arabidopsis thaliana	core promoter element around -30 of transcription start	Promoter related element
BvGT19	TATA-box	TATA	117	4	+	Arabidopsis thaliana	core promoter element around -30 of transcription start	Promoter related element
BvGT19	TATA-box	TATATA	252	6	+	Arabidopsis thaliana	core promoter element around -30 of transcription start	Promoter related element
BvGT19	TATA-box	TATA	254	4	+	Arabidopsis thaliana	core promoter element around -30 of transcription start	Promoter related element
BvGT19	TATA-box	taTATAAAtc	1088	9	+	Arabidopsis thaliana	core promoter element around -30 of transcription start	Promoter related element
BvGT19	TATA-box	TATA	1161	4	-	Arabidopsis thaliana	core promoter element around -30 of transcription start	Promoter related element
BvGT19	TATA-box	TATA	1190	4	-	Arabidopsis thaliana	core promoter element around -30 of transcription start	Promoter related element
BvGT19	TATA-box	TATAA	1238	5	-	Arabidopsis thaliana	core promoter element around -30 of transcription start	Promoter related element
BvGT19	TATA-box	TATA	1239	4	-	Arabidopsis thaliana	core promoter element around -30 of transcription start	Promoter related element
BvGT19	TATA-box	TACATAAA	1259	8	-	Oryza sativa	core promoter element around -30 of transcription start	Promoter related element
BvGT19	TATA-box	ATATAT	1283	6	-	Brassica napus	core promoter element around -30 of transcription start	Promoter related element
BvGT19	TATA-box	TATATA	1284	6	-	Arabidopsis thaliana	core promoter element around -30 of transcription start	Promoter related element
BvGT19	TATA-box	ATATAT	1285	6	-	Brassica napus	core promoter element around -30 of transcription start	Promoter related element
BvGT19	TATA-box	TATATA	1286	6	-	Arabidopsis thaliana	core promoter element around -30 of transcription start	Promoter related element
BvGT19	TATA-box	ATATAT	1287	6	-	Brassica napus	core promoter element around -30 of transcription start	Promoter related element
BvGT19	TATA-box	TATA	1288	4	-	Arabidopsis thaliana	core promoter element around -30 of transcription start	Promoter related element
BvGT19	TATA-box	ccTATAAAaa	1305	9	+	Arabidopsis thaliana	core promoter element around -30 of transcription start	Promoter related element
BvGT19	TATA-box	ATATAA	1306	6	+	Brassica oleracea	core promoter element around -30 of transcription start	Promoter related element
BvGT19	TATA-box	TATA	1307	4	-	Arabidopsis thaliana	core promoter element around -30 of transcription start	Promoter related element
BvGT19	TATA-box	ccTATAAAaa	1934	9	+	Arabidopsis thaliana	core promoter element around -30 of transcription start	Promoter related element
BvGT19	ARE	AAACCA	754	6	-	Zea mays	cis-acting regulatory element essential for the anaerobic induction	Environmental stress-related element
BvGT19	GT1-motif	GGTTAA	285	6	-	Arabidopsis thaliana	light responsive element	Light responsive elements
BvGT19	GT1-motif	GGTTAAT	1068	7	+	Avena sativa	light responsive element	Light responsive elements
BvGT19	GT1-motif	GGTTAA	1106	6	+	Arabidopsis thaliana	light responsive element	Light responsive elements
BvGT19	GT1-motif	GGTTAAT	1596	7	+	Avena sativa	light responsive element	Light responsive elements
BvGT19	Unnamed__4	CTCC	211	4	+	Petroselinum hortense		Other elements
BvGT19	Unnamed__4	CTCC	315	4	+	Petroselinum hortense		Other elements
BvGT19	Unnamed__4	CTCC	327	4	+	Petroselinum hortense		Other elements
BvGT19	Unnamed__4	CTCC	333	4	+	Petroselinum hortense		Other elements
BvGT19	Unnamed__4	CTCC	339	4	+	Petroselinum hortense		Other elements
BvGT19	Unnamed__4	CTCC	355	4	+	Petroselinum hortense		Other elements
BvGT19	Unnamed__4	CTCC	582	4	-	Petroselinum hortense		Other elements
BvGT19	Unnamed__4	CTCC	673	4	+	Petroselinum hortense		Other elements
BvGT19	Unnamed__4	CTCC	687	4	-	Petroselinum hortense		Other elements
BvGT19	Unnamed__4	CTCC	721	4	+	Petroselinum hortense		Other elements
BvGT19	Unnamed__4	CTCC	772	4	-	Petroselinum hortense		Other elements
BvGT19	Unnamed__4	CTCC	790	4	-	Petroselinum hortense		Other elements
BvGT19	Unnamed__4	CTCC	860	4	-	Petroselinum hortense		Other elements
BvGT19	Unnamed__4	CTCC	899	4	-	Petroselinum hortense		Other elements
BvGT19	Unnamed__4	CTCC	927	4	-	Petroselinum hortense		Other elements
BvGT19	Unnamed__4	CTCC	933	4	-	Petroselinum hortense		Other elements
BvGT19	Unnamed__4	CTCC	959	4	-	Petroselinum hortense		Other elements
BvGT19	Unnamed__4	CTCC	962	4	-	Petroselinum hortense		Other elements
BvGT19	Unnamed__4	CTCC	969	4	-	Petroselinum hortense		Other elements
BvGT19	Unnamed__4	CTCC	975	4	-	Petroselinum hortense		Other elements
BvGT19	Unnamed__4	CTCC	1611	4	-	Petroselinum hortense		Other elements
BvGT19	Unnamed__4	CTCC	1701	4	+	Petroselinum hortense		Other elements
BvGT19	Unnamed__4	CTCC	1731	4	-	Petroselinum hortense		Other elements
BvGT19	Unnamed__4	CTCC	1755	4	-	Petroselinum hortense		Other elements
BvGT19	Unnamed__4	CTCC	1759	4	-	Petroselinum hortense		Other elements
BvGT19	Unnamed__4	CTCC	1779	4	+	Petroselinum hortense		Other elements
BvGT19	Unnamed__4	CTCC	1789	4	+	Petroselinum hortense		Other elements
BvGT19	Unnamed__4	CTCC	1837	4	+	Petroselinum hortense		Other elements
BvGT19	MYB-like sequence	TAACCA	44	6	-	Arabidopsis thaliana		Other elements
BvGT19	MYB-like sequence	TAACCA	1595	6	-	Arabidopsis thaliana		Other elements
BvGT19	chs-Unit 1 m1	ACCTAACCCGC	747	10	-	Hordeum vulgare	part of a light responsive element	Light responsive elements
BvGT19	Unnamed__2	AACCTAACCT	1044	9	-	Petroselinum hortense		Other elements
BvGT19	MYB	TAACCA	44	6	-	Arabidopsis thaliana		Other elements
BvGT19	MYB	CAACCA	622	6	-	Arabidopsis thaliana		Other elements
BvGT19	MYB	TAACCA	1595	6	-	Arabidopsis thaliana		Other elements
BvGT19	CCGTCC motif	CCGTCC	1011	6	-	Nicotiana tabacum		development related elements
BvGT19	Box 4	ATTAAT	1438	6	-	Petroselinum crispum	part of a conserved DNA module involved in light responsiveness	Light responsive elements
BvGT19	AAGAA-motif	gGTAAAGAAA	185	9	-	Avena sativa	Relevant elements of Abscisic acid	Hormone responsive elements
BvGT19	CCGTCC-box	CCGTCC	1011	6	-	Petroselinum hortense		development related elements
BvGT19	GC-motif	CCCCCG	62	6	+	Zea mays	enhancer-like element involved in anoxic specific inducibility	Environmental stress-related element
BvGT19	GATA-motif	AAGGATAAGG	277	9	-	Solanum tuberosum	part of a light responsive element	Light responsive elements
BvGT19	A-box	CCGTCC	1011	6	-	Petroselinum crispum	cis-acting regulatory element	Promoter related element
BvGT19	MYC	CAATTG	1379	6	-	Arabidopsis thaliana		Other elements
BvGT19	re2f-1	GCGGGAAA	1532	8	+	Oryza sativa	Ethylene response factor	Hormone responsive elements
BvGT19	ATCT-motif	AATCTAATCC	230	9	+	Pisum sativum	part of a conserved DNA module involved in light responsiveness	Light responsive elements
BvGT19	ATCT-motif	AATCTAATCC	268	9	+	Pisum sativum	part of a conserved DNA module involved in light responsiveness	Light responsive elements
BvGT19	AE-box	AGAAACAA	1509	8	+	Arabidopsis thaliana	part of a module for light response	Light responsive elements
BvGT19	MRE	AACCTAA	230	7	+	Petroselinum crispum	MYB binding site involved in light responsiveness	Light responsive elements
BvGT19	MRE	AACCTAA	1047	7	-	Petroselinum crispum	MYB binding site involved in light responsiveness	Light responsive elements
BvGT19	TCCC-motif	TCTCCCT	1757	7	-	Spinacia oleracea	part of a light responsive element	Light responsive elements
BvGT19	Unnamed__1	CGTGG	563	5	-	Zea mays	60K protein binding site	Other elements
BvGT19	Unnamed__1	CGTGG	620	5	+	Zea mays	60K protein binding site	Other elements
BvGT19	circadian	CAAAGATATC	1288	9	-	Lycopersicon esculentum	cis-acting regulatory element involved in circadian control	development related elements
BvGT19		motif_sequence	359	4	+	organism	short_function	Other elements
BvGT19		motif_sequence	615	4	+	organism	short_function	Other elements
BvGT19		motif_sequence	671	4	+	organism	short_function	Other elements
BvGT19		motif_sequence	676	4	+	organism	short_function	Other elements
BvGT19		motif_sequence	779	4	+	organism	short_function	Other elements
BvGT19		motif_sequence	911	4	-	organism	short_function	Other elements
BvGT19		motif_sequence	962	4	-	organism	short_function	Other elements
BvGT19		motif_sequence	975	4	-	organism	short_function	Other elements
BvGT19		motif_sequence	1272	4	+	organism	short_function	Other elements
BvGT19		motif_sequence	1351	4	+	organism	short_function	Other elements
BvGT19		motif_sequence	1731	4	-	organism	short_function	Other elements
BvGT19		motif_sequence	1759	4	-	organism	short_function	Other elements
BvGT19		motif_sequence	1787	4	+	organism	short_function	Other elements
BvGT19		motif_sequence	1794	4	+	organism	short_function	Other elements
BvGT2	TATA	TATAAAAT	1118	8	-	Arabidopsis thaliana		Other elements
BvGT2	TCT-motif	TCTTAC	599	6	+	Arabidopsis thaliana	part of a light responsive element	Light responsive elements
BvGT2	TCT-motif	TCTTAC	1314	6	+	Arabidopsis thaliana	part of a light responsive element	Light responsive elements
BvGT2	TCT-motif	TCTTAC	1814	6	-	Arabidopsis thaliana	part of a light responsive element	Light responsive elements
BvGT2	AT~TATA-box	TATATA	170	6	+	Arabidopsis thaliana	Site-binding related elements	Promoter related element
BvGT2	AT~TATA-box	TATATAAA	461	8	-	Arabidopsis thaliana	Site-binding related elements	Promoter related element
BvGT2	AT~TATA-box	TATATA	463	6	+	Arabidopsis thaliana	Site-binding related elements	Promoter related element
BvGT2	AT~TATA-box	TATATAAA	1120	8	-	Arabidopsis thaliana	Site-binding related elements	Promoter related element
BvGT2	AT~TATA-box	TATATA	1122	6	-	Arabidopsis thaliana	Site-binding related elements	Promoter related element
BvGT2	AT~TATA-box	TATATA	1124	6	-	Arabidopsis thaliana	Site-binding related elements	Promoter related element
BvGT2	AT~TATA-box	TATATA	1369	6	-	Arabidopsis thaliana	Site-binding related elements	Promoter related element
BvGT2	AT~TATA-box	TATATA	1666	6	-	Arabidopsis thaliana	Site-binding related elements	Promoter related element
BvGT2	AT~TATA-box	TATATA	1668	6	-	Arabidopsis thaliana	Site-binding related elements	Promoter related element
BvGT2	AT~TATA-box	TATATA	1983	6	-	Arabidopsis thaliana	Site-binding related elements	Promoter related element
BvGT2	Myb	TAACTG	1350	6	+	Arabidopsis thaliana		Other elements
BvGT2	CAAT-box	CCAAT	126	5	+	Arabidopsis thaliana	common cis-acting element in promoter and enhancer regions	Site-binding related elements
BvGT2	CAAT-box	CAAT	127	4	+	Nicotiana glutinosa	common cis-acting element in promoter and enhancer regions	Site-binding related elements
BvGT2	CAAT-box	CAAT	298	4	+	Nicotiana glutinosa	common cis-acting element in promoter and enhancer regions	Site-binding related elements
BvGT2	CAAT-box	CAAAT	333	5	-	Pisum sativum	common cis-acting element in promoter and enhancer regions	Site-binding related elements
BvGT2	CAAT-box	CAAT	399	4	+	Nicotiana glutinosa	common cis-acting element in promoter and enhancer regions	Site-binding related elements
BvGT2	CAAT-box	CAAAT	417	5	+	Pisum sativum	common cis-acting element in promoter and enhancer regions	Site-binding related elements
BvGT2	CAAT-box	CAAT	429	4	-	Nicotiana glutinosa	common cis-acting element in promoter and enhancer regions	Site-binding related elements
BvGT2	CAAT-box	CAAT	446	4	-	Nicotiana glutinosa	common cis-acting element in promoter and enhancer regions	Site-binding related elements
BvGT2	CAAT-box	CAAT	452	4	-	Nicotiana glutinosa	common cis-acting element in promoter and enhancer regions	Site-binding related elements
BvGT2	CAAT-box	CAAT	487	4	+	Nicotiana glutinosa	common cis-acting element in promoter and enhancer regions	Site-binding related elements
BvGT2	CAAT-box	CAAT	498	4	-	Nicotiana glutinosa	common cis-acting element in promoter and enhancer regions	Site-binding related elements
BvGT2	CAAT-box	CAAT	662	4	-	Nicotiana glutinosa	common cis-acting element in promoter and enhancer regions	Site-binding related elements
BvGT2	CAAT-box	CAAAT	671	5	+	Pisum sativum	common cis-acting element in promoter and enhancer regions	Site-binding related elements
BvGT2	CAAT-box	CAAT	695	4	+	Nicotiana glutinosa	common cis-acting element in promoter and enhancer regions	Site-binding related elements
BvGT2	CAAT-box	CAAT	763	4	-	Nicotiana glutinosa	common cis-acting element in promoter and enhancer regions	Site-binding related elements
BvGT2	CAAT-box	CAAAT	798	5	-	Pisum sativum	common cis-acting element in promoter and enhancer regions	Site-binding related elements
BvGT2	CAAT-box	CCAAT	885	5	+	Arabidopsis thaliana	common cis-acting element in promoter and enhancer regions	Site-binding related elements
BvGT2	CAAT-box	CAAT	886	4	+	Nicotiana glutinosa	common cis-acting element in promoter and enhancer regions	Site-binding related elements
BvGT2	CAAT-box	CAAAT	944	5	-	Pisum sativum	common cis-acting element in promoter and enhancer regions	Site-binding related elements
BvGT2	CAAT-box	CAAAT	1008	5	+	Pisum sativum	common cis-acting element in promoter and enhancer regions	Site-binding related elements
BvGT2	CAAT-box	CAAT	1021	4	+	Nicotiana glutinosa	common cis-acting element in promoter and enhancer regions	Site-binding related elements
BvGT2	CAAT-box	CAAT	1040	4	+	Nicotiana glutinosa	common cis-acting element in promoter and enhancer regions	Site-binding related elements
BvGT2	CAAT-box	CAAAT	1064	5	-	Pisum sativum	common cis-acting element in promoter and enhancer regions	Site-binding related elements
BvGT2	CAAT-box	CAAAT	1196	5	-	Pisum sativum	common cis-acting element in promoter and enhancer regions	Site-binding related elements
BvGT2	CAAT-box	CAAT	1271	4	-	Nicotiana glutinosa	common cis-acting element in promoter and enhancer regions	Site-binding related elements
BvGT2	CAAT-box	CAAT	1381	4	-	Nicotiana glutinosa	common cis-acting element in promoter and enhancer regions	Site-binding related elements
BvGT2	CAAT-box	CAAT	1418	4	-	Nicotiana glutinosa	common cis-acting element in promoter and enhancer regions	Site-binding related elements
BvGT2	CAAT-box	CAAT	1695	4	+	Nicotiana glutinosa	common cis-acting element in promoter and enhancer regions	Site-binding related elements
BvGT2	CAAT-box	CAAT	1991	4	-	Nicotiana glutinosa	common cis-acting element in promoter and enhancer regions	Site-binding related elements
BvGT2	Myc	TCTCTTA	1222	7	+	Arabidopsis thaliana		Other elements
BvGT2	Myc	TCTCTTA	1305	7	+	Arabidopsis thaliana		Other elements
BvGT2	Myb-binding site	CAACAG	1587	6	+	Nicotiana tabacum		Site-binding related elements
BvGT2	ABRE	ACGTG	851	5	+	Arabidopsis thaliana	cis-acting element involved in the abscisic acid responsiveness	Hormone responsive elements
BvGT2	ARE	AAACCA	1606	6	+	Zea mays	cis-acting regulatory element essential for the anaerobic induction	Environmental stress-related element
BvGT2	STRE	AGGGG	1738	5	-	Arabidopsis thaliana	Stress response element	Environmental stress-related element
BvGT2	TATA-box	TATATTTATATTT	1	12	+	Avena sativa	core promoter element around -30 of transcription start	Promoter related element
BvGT2	TATA-box	TATAAAA	4	7	-	Pisum sativum	core promoter element around -30 of transcription start	Promoter related element
BvGT2	TATA-box	TATAAA	5	6	-	Helianthus annuus	core promoter element around -30 of transcription start	Promoter related element
BvGT2	TATA-box	TATAA	6	5	-	Arabidopsis thaliana	core promoter element around -30 of transcription start	Promoter related element
BvGT2	TATA-box	TATA	7	4	+	Arabidopsis thaliana	core promoter element around -30 of transcription start	Promoter related element
BvGT2	TATA-box	ATATAT	169	6	+	Brassica napus	core promoter element around -30 of transcription start	Promoter related element
BvGT2	TATA-box	TATATA	170	6	+	Arabidopsis thaliana	core promoter element around -30 of transcription start	Promoter related element
BvGT2	TATA-box	ATATAA	171	6	+	Brassica oleracea	core promoter element around -30 of transcription start	Promoter related element
BvGT2	TATA-box	TATA	172	4	+	Arabidopsis thaliana	core promoter element around -30 of transcription start	Promoter related element
BvGT2	TATA-box	TATA	218	4	+	Arabidopsis thaliana	core promoter element around -30 of transcription start	Promoter related element
BvGT2	TATA-box	ATTATA	231	6	+	Brassica napus	core promoter element around -30 of transcription start	Promoter related element
BvGT2	TATA-box	TATAA	232	5	-	Arabidopsis thaliana	core promoter element around -30 of transcription start	Promoter related element
BvGT2	TATA-box	TATA	233	4	+	Arabidopsis thaliana	core promoter element around -30 of transcription start	Promoter related element
BvGT2	TATA-box	TACAAAA	251	7	+	Oryza sativa	core promoter element around -30 of transcription start	Promoter related element
BvGT2	TATA-box	TATA	344	4	+	Arabidopsis thaliana	core promoter element around -30 of transcription start	Promoter related element
BvGT2	TATA-box	ATTATA	363	6	+	Brassica napus	core promoter element around -30 of transcription start	Promoter related element
BvGT2	TATA-box	TATAA	364	5	-	Arabidopsis thaliana	core promoter element around -30 of transcription start	Promoter related element
BvGT2	TATA-box	TATA	365	4	+	Arabidopsis thaliana	core promoter element around -30 of transcription start	Promoter related element
BvGT2	TATA-box	TATAAA	435	6	-	Helianthus annuus	core promoter element around -30 of transcription start	Promoter related element
BvGT2	TATA-box	TATAA	436	5	-	Arabidopsis thaliana	core promoter element around -30 of transcription start	Promoter related element
BvGT2	TATA-box	TATA	437	4	+	Arabidopsis thaliana	core promoter element around -30 of transcription start	Promoter related element
BvGT2	TATA-box	taTATAAAtc	459	9	-	Arabidopsis thaliana	core promoter element around -30 of transcription start	Promoter related element
BvGT2	TATA-box	TATAAAT	460	7	-	Brassica juncea	core promoter element around -30 of transcription start	Promoter related element
BvGT2	TATA-box	TATAAA	461	6	-	Helianthus annuus	core promoter element around -30 of transcription start	Promoter related element
BvGT2	TATA-box	TATATAA	462	7	-	Arabidopsis thaliana	core promoter element around -30 of transcription start	Promoter related element
BvGT2	TATA-box	TATATA	463	6	+	Arabidopsis thaliana	core promoter element around -30 of transcription start	Promoter related element
BvGT2	TATA-box	ATATAA	464	6	+	Brassica oleracea	core promoter element around -30 of transcription start	Promoter related element
BvGT2	TATA-box	TATA	465	4	+	Arabidopsis thaliana	core promoter element around -30 of transcription start	Promoter related element
BvGT2	TATA-box	TATAAA	525	6	-	Helianthus annuus	core promoter element around -30 of transcription start	Promoter related element
BvGT2	TATA-box	TATAA	526	5	-	Arabidopsis thaliana	core promoter element around -30 of transcription start	Promoter related element
BvGT2	TATA-box	TATA	527	4	+	Arabidopsis thaliana	core promoter element around -30 of transcription start	Promoter related element
BvGT2	TATA-box	TATAAAT	724	7	-	Brassica juncea	core promoter element around -30 of transcription start	Promoter related element
BvGT2	TATA-box	TATAAA	725	6	-	Helianthus annuus	core promoter element around -30 of transcription start	Promoter related element
BvGT2	TATA-box	TATAA	726	5	-	Arabidopsis thaliana	core promoter element around -30 of transcription start	Promoter related element
BvGT2	TATA-box	TATA	727	4	+	Arabidopsis thaliana	core promoter element around -30 of transcription start	Promoter related element
BvGT2	TATA-box	TATAA	758	5	-	Arabidopsis thaliana	core promoter element around -30 of transcription start	Promoter related element
BvGT2	TATA-box	TATA	759	4	+	Arabidopsis thaliana	core promoter element around -30 of transcription start	Promoter related element
BvGT2	TATA-box	ATATAA	778	6	+	Brassica oleracea	core promoter element around -30 of transcription start	Promoter related element
BvGT2	TATA-box	TATA	779	4	+	Arabidopsis thaliana	core promoter element around -30 of transcription start	Promoter related element
BvGT2	TATA-box	TATAAA	864	6	-	Helianthus annuus	core promoter element around -30 of transcription start	Promoter related element
BvGT2	TATA-box	TATAA	865	5	-	Arabidopsis thaliana	core promoter element around -30 of transcription start	Promoter related element
BvGT2	TATA-box	TATA	866	4	+	Arabidopsis thaliana	core promoter element around -30 of transcription start	Promoter related element
BvGT2	TATA-box	TATAAAT	1042	7	-	Brassica juncea	core promoter element around -30 of transcription start	Promoter related element
BvGT2	TATA-box	TATAAA	1043	6	-	Helianthus annuus	core promoter element around -30 of transcription start	Promoter related element
BvGT2	TATA-box	TATAA	1044	5	-	Arabidopsis thaliana	core promoter element around -30 of transcription start	Promoter related element
BvGT2	TATA-box	TATA	1045	4	-	Arabidopsis thaliana	core promoter element around -30 of transcription start	Promoter related element
BvGT2	TATA-box	TATAAAA	1119	7	-	Pisum sativum	core promoter element around -30 of transcription start	Promoter related element
BvGT2	TATA-box	TATAAA	1120	6	-	Helianthus annuus	core promoter element around -30 of transcription start	Promoter related element
BvGT2	TATA-box	TATATAA	1121	7	-	Arabidopsis thaliana	core promoter element around -30 of transcription start	Promoter related element
BvGT2	TATA-box	TATATA	1122	6	-	Arabidopsis thaliana	core promoter element around -30 of transcription start	Promoter related element
BvGT2	TATA-box	ATATAT	1123	6	-	Brassica napus	core promoter element around -30 of transcription start	Promoter related element
BvGT2	TATA-box	TATATA	1124	6	-	Arabidopsis thaliana	core promoter element around -30 of transcription start	Promoter related element
BvGT2	TATA-box	TATA	1126	4	-	Arabidopsis thaliana	core promoter element around -30 of transcription start	Promoter related element
BvGT2	TATA-box	ATATAT	1254	6	-	Brassica napus	core promoter element around -30 of transcription start	Promoter related element
BvGT2	TATA-box	TATA	1255	4	-	Arabidopsis thaliana	core promoter element around -30 of transcription start	Promoter related element
BvGT2	TATA-box	TATA	1326	4	-	Arabidopsis thaliana	core promoter element around -30 of transcription start	Promoter related element
BvGT2	TATA-box	ATATAT	1368	6	-	Brassica napus	core promoter element around -30 of transcription start	Promoter related element
BvGT2	TATA-box	TATATA	1369	6	-	Arabidopsis thaliana	core promoter element around -30 of transcription start	Promoter related element
BvGT2	TATA-box	ATATAT	1370	6	-	Brassica napus	core promoter element around -30 of transcription start	Promoter related element
BvGT2	TATA-box	TATA	1371	4	-	Arabidopsis thaliana	core promoter element around -30 of transcription start	Promoter related element
BvGT2	TATA-box	TATACA	1420	6	-	Helianthus annuus	core promoter element around -30 of transcription start	Promoter related element
BvGT2	TATA-box	TATA	1422	4	-	Arabidopsis thaliana	core promoter element around -30 of transcription start	Promoter related element
BvGT2	TATA-box	ATATAT	1665	6	-	Brassica napus	core promoter element around -30 of transcription start	Promoter related element
BvGT2	TATA-box	TATATA	1666	6	-	Arabidopsis thaliana	core promoter element around -30 of transcription start	Promoter related element
BvGT2	TATA-box	ATATAT	1667	6	-	Brassica napus	core promoter element around -30 of transcription start	Promoter related element
BvGT2	TATA-box	TATATA	1668	6	-	Arabidopsis thaliana	core promoter element around -30 of transcription start	Promoter related element
BvGT2	TATA-box	TATA	1670	4	-	Arabidopsis thaliana	core promoter element around -30 of transcription start	Promoter related element
BvGT2	TATA-box	ATATAA	1675	6	+	Brassica oleracea	core promoter element around -30 of transcription start	Promoter related element
BvGT2	TATA-box	TATA	1676	4	-	Arabidopsis thaliana	core promoter element around -30 of transcription start	Promoter related element
BvGT2	TATA-box	TAAAGATT	1696	8	-	Arabidopsis thaliana	core promoter element around -30 of transcription start	Promoter related element
BvGT2	TATA-box	TATAAA	1700	6	-	Helianthus annuus	core promoter element around -30 of transcription start	Promoter related element
BvGT2	TATA-box	TATAA	1701	5	-	Arabidopsis thaliana	core promoter element around -30 of transcription start	Promoter related element
BvGT2	TATA-box	TATA	1702	4	-	Arabidopsis thaliana	core promoter element around -30 of transcription start	Promoter related element
BvGT2	TATA-box	ATATAT	1770	6	-	Brassica napus	core promoter element around -30 of transcription start	Promoter related element
BvGT2	TATA-box	TATA	1771	4	-	Arabidopsis thaliana	core promoter element around -30 of transcription start	Promoter related element
BvGT2	TATA-box	ATATAT	1982	6	-	Brassica napus	core promoter element around -30 of transcription start	Promoter related element
BvGT2	TATA-box	TATATA	1983	6	-	Arabidopsis thaliana	core promoter element around -30 of transcription start	Promoter related element
BvGT2	TATA-box	ATATAT	1984	6	-	Brassica napus	core promoter element around -30 of transcription start	Promoter related element
BvGT2	TATA-box	TATA	1985	4	-	Arabidopsis thaliana	core promoter element around -30 of transcription start	Promoter related element
BvGT2	TATA-box	ATATAT	1995	6	-	Brassica napus	core promoter element around -30 of transcription start	Promoter related element
BvGT2	TATA-box	TATA	1996	4	-	Arabidopsis thaliana	core promoter element around -30 of transcription start	Promoter related element
BvGT2	CCAAT-box	CAACGG	560	6	+	Hordeum vulgare	MYBHv1 binding site	Site-binding related elements
BvGT2	GT1-motif	GGTTAA	179	6	-	Arabidopsis thaliana	light responsive element	Light responsive elements
BvGT2	GT1-motif	GGTTAAT	983	7	+	Avena sativa	light responsive element	Light responsive elements
BvGT2	MYB-like sequence	TAACCA	180	6	+	Arabidopsis thaliana		Other elements
BvGT2	MYB-like sequence	TAACCA	755	6	-	Arabidopsis thaliana		Other elements
BvGT2	MYB-like sequence	TAACCA	982	6	-	Arabidopsis thaliana		Other elements
BvGT2	MYB-like sequence	TAACCA	1075	6	-	Arabidopsis thaliana		Other elements
BvGT2	TC-rich repeats	GTTTTCTTAC	1814	9	-	Nicotiana tabacum	cis-acting element involved in defense and stress responsiveness	Environmental stress-related element
BvGT2	TC-rich repeats	GTTTTCTTAC	1822	9	-	Nicotiana tabacum	cis-acting element involved in defense and stress responsiveness	Environmental stress-related element
BvGT2	Unnamed__4	CTCC	245	4	+	Petroselinum hortense		Other elements
BvGT2	Unnamed__4	CTCC	624	4	+	Petroselinum hortense		Other elements
BvGT2	Unnamed__4	CTCC	1214	4	+	Petroselinum hortense		Other elements
BvGT2	Unnamed__4	CTCC	1570	4	-	Petroselinum hortense		Other elements
BvGT2	Unnamed__4	CTCC	1736	4	+	Petroselinum hortense		Other elements
BvGT2	Unnamed__4	CTCC	1743	4	+	Petroselinum hortense		Other elements
BvGT2	Unnamed__4	CTCC	1924	4	+	Petroselinum hortense		Other elements
BvGT2	chs-CMA1a	TTACTTAA	1316	8	+	Daucus carota	part of a light responsive element	Light responsive elements
BvGT2	ERE	ATTTCATA	84	8	-	Nicotiana glutinos	estrogen response element	Hormone responsive elements
BvGT2	MYB	TAACCA	180	6	+	Arabidopsis thaliana		Other elements
BvGT2	MYB	TAACCA	755	6	-	Arabidopsis thaliana		Other elements
BvGT2	MYB	TAACCA	982	6	-	Arabidopsis thaliana		Other elements
BvGT2	MYB	TAACCA	1075	6	-	Arabidopsis thaliana		Other elements
BvGT2	MYB	CAACAG	1587	6	+	Arabidopsis thaliana		Other elements
BvGT2	MYB	CAACCA	1636	6	+	Arabidopsis thaliana		Other elements
BvGT2	Box 4	ATTAAT	225	6	+	Petroselinum crispum	part of a conserved DNA module involved in light responsiveness	Light responsive elements
BvGT2	Box 4	ATTAAT	494	6	+	Petroselinum crispum	part of a conserved DNA module involved in light responsiveness	Light responsive elements
BvGT2	Box 4	ATTAAT	683	6	+	Petroselinum crispum	part of a conserved DNA module involved in light responsiveness	Light responsive elements
BvGT2	Box 4	ATTAAT	1145	6	-	Petroselinum crispum	part of a conserved DNA module involved in light responsiveness	Light responsive elements
BvGT2	WRE3	CCACCT	1931	6	+	Pisum sativum		Other elements
BvGT2	G-Box	CACGTT	850	6	-	Pisum sativum	cis-acting regulatory element involved in light responsiveness	Light responsive elements
BvGT2	MYB recognition site	CCGTTG	560	6	-	Arabidopsis thaliana		Site-binding related elements
BvGT2	3-AF1 binding site	TAAGAGAGGAA	1301	10	-	Solanum tuberosum	light responsive element	Light responsive elements
BvGT2	RY-element	CATGCATG	976	8	+	Helianthus annuus	cis-acting regulatory element involved in seed-specific regulation	development related elements
BvGT2	AAGAA-motif	gGTAAAGAAA	829	9	+	Avena sativa	Relevant elements of Abscisic acid	Hormone responsive elements
BvGT2	AAGAA-motif	GAAAGAA	1939	7	-	Avena sativa	Relevant elements of Abscisic acid	Hormone responsive elements
BvGT2	AAGAA-motif	GAAAGAA	1943	7	-	Avena sativa	Relevant elements of Abscisic acid	Hormone responsive elements
BvGT2	AAGAA-motif	GAAAGAA	1947	7	-	Avena sativa	Relevant elements of Abscisic acid	Hormone responsive elements
BvGT2	AAGAA-motif	GAAAGAA	1951	7	-	Avena sativa	Relevant elements of Abscisic acid	Hormone responsive elements
BvGT2	ATC-motif	AGTAATCT	1292	8	-	Spinacia oleracea	part of a conserved DNA module involved in light responsiveness	Light responsive elements
BvGT2	AE-box	AGAAACTT	268	8	-	Arabidopsis thaliana	part of a module for light response	Light responsive elements
BvGT2	AE-box	AGAAACAA	1162	8	-	Arabidopsis thaliana	part of a module for light response	Light responsive elements
BvGT2	AE-box	AGAAACAA	1198	8	-	Arabidopsis thaliana	part of a module for light response	Light responsive elements
BvGT2	Box II	TGGTAATAA	1031	9	-	Solanum tuberosum	part of a light responsive element	Light responsive elements
BvGT2	MYC	CATTTG	671	6	-	Arabidopsis thaliana		Other elements
BvGT2	MYC	CATTTG	1195	6	+	Arabidopsis thaliana		Other elements
BvGT2	circadian	CAAAGATATC	527	9	-	Lycopersicon esculentum	cis-acting regulatory element involved in circadian control	development related elements
BvGT2	G-box	CACGAC	549	6	+	Zea mays	cis-acting regulatory element involved in light responsiveness	Light responsive elements
BvGT2		motif_sequence	1003	4	+	organism	short_function	Other elements
BvGT2		motif_sequence	1362	4	+	organism	short_function	Other elements
BvGT2		motif_sequence	1364	4	-	organism	short_function	Other elements
BvGT2		motif_sequence	1537	4	-	organism	short_function	Other elements
BvGT2		motif_sequence	1579	4	-	organism	short_function	Other elements
BvGT2		motif_sequence	1734	4	+	organism	short_function	Other elements
BvGT2		motif_sequence	1741	4	+	organism	short_function	Other elements
BvGT2		motif_sequence	1906	4	+	organism	short_function	Other elements
BvGT2		motif_sequence	1922	4	+	organism	short_function	Other elements
BvGT2	O2-site	GATGACATGG	966	9	-	Zea mays	cis-acting regulatory element involved in zein metabolism regulation	development related elements
BvGT20	Box 4	ATTAAT	108	6	+	Petroselinum crispum	part of a conserved DNA module involved in light responsiveness	Light responsive elements
BvGT20	Box 4	ATTAAT	242	6	+	Petroselinum crispum	part of a conserved DNA module involved in light responsiveness	Light responsive elements
BvGT20	Box 4	ATTAAT	739	6	+	Petroselinum crispum	part of a conserved DNA module involved in light responsiveness	Light responsive elements
BvGT20	Box 4	ATTAAT	952	6	+	Petroselinum crispum	part of a conserved DNA module involved in light responsiveness	Light responsive elements
BvGT20	G-Box	TCCACATGGCA	20	10	-	Triticum aestivum	cis-acting regulatory element involved in light responsiveness	Light responsive elements
BvGT20	AAGAA-motif	GAAAGAA	364	7	-	Avena sativa	Relevant elements of Abscisic acid	Hormone responsive elements
BvGT20	AAGAA-motif	gGTAAAGAAA	575	9	+	Avena sativa	Relevant elements of Abscisic acid	Hormone responsive elements
BvGT20	AAGAA-motif	gGTAAAGAAA	620	9	+	Avena sativa	Relevant elements of Abscisic acid	Hormone responsive elements
BvGT20	AAGAA-motif	gGTAAAGAAA	667	9	+	Avena sativa	Relevant elements of Abscisic acid	Hormone responsive elements
BvGT20	AAGAA-motif	GAAAGAA	669	7	+	Avena sativa	Relevant elements of Abscisic acid	Hormone responsive elements
BvGT20	CCGTCC-box	CCGTCC	419	6	+	Petroselinum hortense		development related elements
BvGT20	ATC-motif	AGTAATCT	1248	8	+	Spinacia oleracea	part of a conserved DNA module involved in light responsiveness	Light responsive elements
BvGT20	GATA-motif	AAGGATAAGG	692	9	-	Solanum tuberosum	part of a light responsive element	Light responsive elements
BvGT20	GATA-motif	GATAGGG	1067	7	-	Pisum sativum	part of a light responsive element	Light responsive elements
BvGT20	MYC	CATGTG	23	6	+	Arabidopsis thaliana		Other elements
BvGT20	MYC	CATTTG	1131	6	+	Arabidopsis thaliana		Other elements
BvGT20	MYC	CATTTG	1166	6	+	Arabidopsis thaliana		Other elements
BvGT20	MYC	CAATTG	1524	6	-	Arabidopsis thaliana		Other elements
BvGT20	MYC	CAATTG	1652	6	-	Arabidopsis thaliana		Other elements
BvGT20	MYC	CATTTG	1911	6	-	Arabidopsis thaliana		Other elements
BvGT20	A-box	CCGTCC	419	6	+	Petroselinum crispum	cis-acting regulatory element	Promoter related element
BvGT20	TCCC-motif	TCTCCCT	818	7	+	Spinacia oleracea	part of a light responsive element	Light responsive elements
BvGT20	TATC-box	TATCCCA	1403	7	-	Oryza sativa	cis-acting element involved in gibberellin-responsiveness	Hormone responsive elements
BvGT20		motif_sequence	6	4	+	organism	short_function	Other elements
BvGT20		motif_sequence	384	4	+	organism	short_function	Other elements
BvGT20		motif_sequence	437	4	+	organism	short_function	Other elements
BvGT20		motif_sequence	512	4	+	organism	short_function	Other elements
BvGT20		motif_sequence	858	4	+	organism	short_function	Other elements
BvGT20		motif_sequence	1102	4	-	organism	short_function	Other elements
BvGT20		motif_sequence	1343	4	-	organism	short_function	Other elements
BvGT20		motif_sequence	1579	4	-	organism	short_function	Other elements
BvGT20		motif_sequence	1627	4	+	organism	short_function	Other elements
BvGT20		motif_sequence	1679	4	-	organism	short_function	Other elements
BvGT20		motif_sequence	1703	4	+	organism	short_function	Other elements
BvGT20		motif_sequence	1817	4	-	organism	short_function	Other elements
BvGT20		motif_sequence	1944	4	-	organism	short_function	Other elements
BvGT20	G-box	CACGAC	1665	6	+	Zea mays	cis-acting regulatory element involved in light responsiveness	Light responsive elements
BvGT20	CAT-box	GCCACT	1646	6	-	Arabidopsis thaliana	cis-acting regulatory element related to meristem expression	development related elements
BvGT20	O2-site	GATGATGTGG	89	10	-	Zea mays	cis-acting regulatory element involved in zein metabolism regulation	development related elements
[truncated: 3,821 more rows]
