# Supplementary material for: Genome-wide identification, expression profiles and phylogenetic analysis of Trihelix transcription factor family genes in sugar beet (Beta vulgaris L.) under abiotic stresses
Source: Research Square preprint supplement (doi:10.21203/rs.3.rs-7657378/v1), 2025-12-11
Supplement: Supplementary file 3 [file 86b5929ac4ff3b4f37eaa08b.xlsx]

## Sheet: The segmental duplicates.
Table S4. The one pair of segmental duplicates in BvGT genes.
BvGT Gene Name	BvGT Gene ID	Subfamily	Location		BvGT Gene Name	BvGT Gene ID	Subfamily	Location
BvGT30	transcript:KMT03044	SIP1	8	=	BvGT37	transcript:KMT00781	SIP1	9
