# Supplementary material for: Genome-wide identification, expression profiles and phylogenetic analysis of Trihelix transcription factor family genes in sugar beet (Beta vulgaris L.) under abiotic stresses
Source: Research Square preprint supplement (doi:10.21203/rs.3.rs-7657378/v1), 2025-12-11
Supplement: Supplementary file 4 [file ad036a8349d9987c7614bda1.xlsx]

## Sheet: Tajima's Neutrality Test.
Table S6. Results from Tajima's Neutrality Test.
m	S	ps	Θ	π	D
37	93	1	0.239546	0.854742	9.48654
NOTE.-- The analysis involved 37 amino acid sequences. All positions containing gaps and missing data were eliminated. There were a total of 93 positions in the final dataset. Evolutionary analyses were conducted in MEGA7 [2].
Abbreviations: m = number of sequences, n = total number of sites, S = Number of segregating sites, ps = S/n, Θ = ps/a1, π = nucleotide diversity, and D is the Tajima test statistic (see chapter 12 in ref. [3] for details).
1. Tajima F. (1989). Statistical methods to test for nucleotide mutation hypothesis by DNA polymorphism. Genetics 123:585-595.
2. Kumar S., Stecher G., and Tamura K. (2015). MEGA7: Molecular Evolutionary Genetics Analysis version 7.0 for bigger datasets.Molecular Biology and Evolution (submitted).
3. Nei M. and Kumar S. (2000). Molecular Evolution and Phylogenetics. Oxford University Press, New York.
Disclaimer: Although utmost care has been taken to ensure the correctness of the caption, the caption text is provided "as is" without any warranty of any kind. Authors advise the user to carefully check the caption prior to its use for any purpose and report any errors or problems to the authors immediately (www.megasoftware.net). In no event shall the authors and their employers be liable for a…
